# Supplementary material
Source: bioRxiv or medRxiv preprint supplement (https://www.biorxiv.org/highwire/filestream/72009/field_highwire_adjunct_files/0/235713-1.pdf)
Supplement: Supplementary file [file 235713-1.pdf]

## Supplementary figure legends:

**Figure S1. WAGO-4 is involved in RNAi targeting germline-expressed genes.** (a) Schematic of WAGO-4 and the *ust42* allele generated by CRISPR/Cas9 technology. (b) Feeding RNAi analysis of indicated animals. *pos-1* RNAi induces embryonic lethality; *lir-1* RNAi elicits growth arrest at the L2 stage; *lin-15b* RNAi results in the *muv* phenotype in F1 animals.  $n > 100$  animals. (c) Quantification of fluorescence density of indicated animals of F1 progeny at L4 stages, measured by ImageJ. Related to Figure 1A.  $n$  indicates the number of animals measured.  $***p < 0.001$ . (d, e) The indicated animals were treated with *pos-1* or *mex-5* dsRNA, and the phenotypes were scored.

**Figure S2. WAGO-4 is a germline-expressed Argonaute protein.** (a) Quantification of fluorescence density of *GFP::WAGO-4* animals, measured by ImageJ.  $n$  indicates the number of animals quantified.  $***p < 0.001$ ; ns, not significant. (b) Images of *GFP::WAGO-4* at indicated developmental stages.

**Figure S3. WAGO-4 promotes RNAi inheritance.** Images of indicated animals after *gfp* RNAi. F1 embryos were transferred to HT115 control bacteria in the absence of *gfp* dsRNA.

**Figure S4. WAGO-4 binds to 22G-RNAs.** (a) 3xFLAG::*GFP::WAGO-4* was immunoprecipitated from indicated animals and blotted by anti-FLAG antibody. (b) Distribution of the first two nucleotides of WAGO-4 siRNAs. (c) Brood size of indicated animals at 20°C.  $n$  indicates the number of animals scored.  $\text{mean} \pm \text{s.d.}$ . (d) Relative mRNA levels of endogenous WAGO-4 22G-RNA targets in *wago-4(ust42)* animals. Right panel indicates the ranking of WAGO-4 22G-RNA targets.  $n=3$ ,  $\text{mean} \pm \text{s.d.}$ .

**Figure S5. CDE-1 polyuridylylates WAGO-4 22G-RNAs.** (a) Nucleotide distribution

of WAGO-4 22G-RNAs in wild type animals (left panel) and in *cde-1* mutants (right panel). (b) Small RNA categories of WAGO-4 22G-RNA in wild type animals and *cde-1* mutants. (c) Images of indicated animals after *gfp* RNAi. F1 animals were incubated on HT115 control bacteria. The *gfp* levels were scored in the right panel.

**Table S1:** WAGO-4 22G-RNA-targeted genes. The targets were selected using a threshold of 25 reads per million total reads.

**Table S2:** The sequences of real-time PCR primers.

Figure S1

A

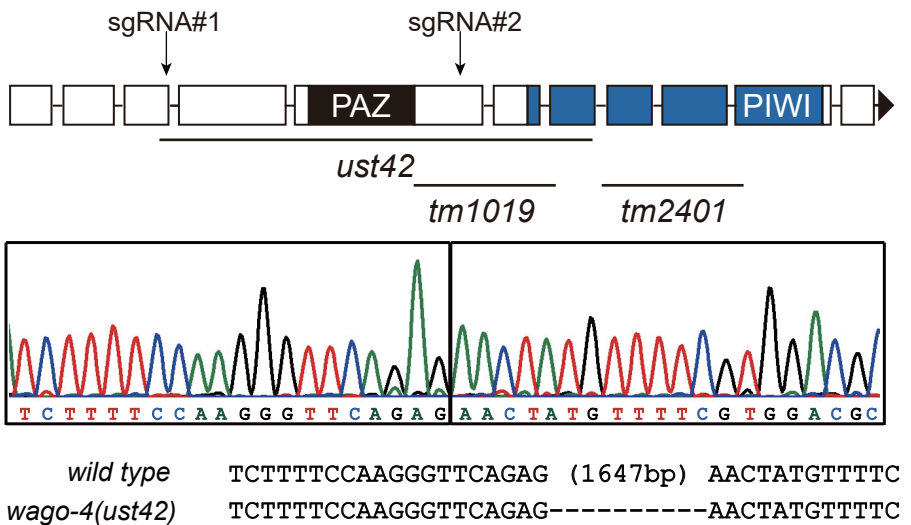

B

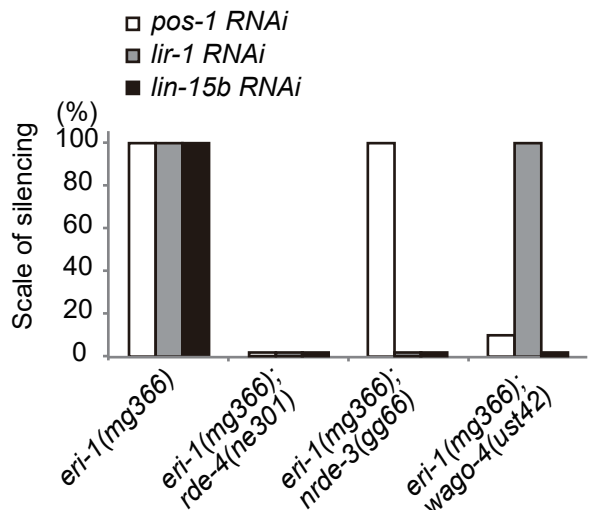

C

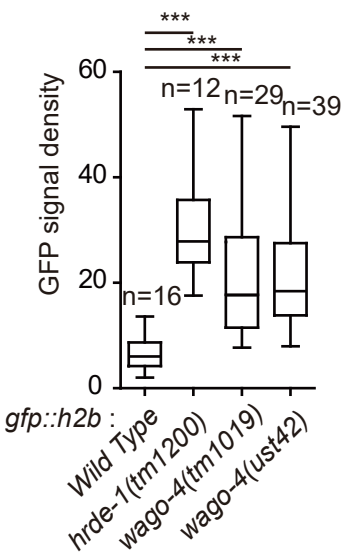

D

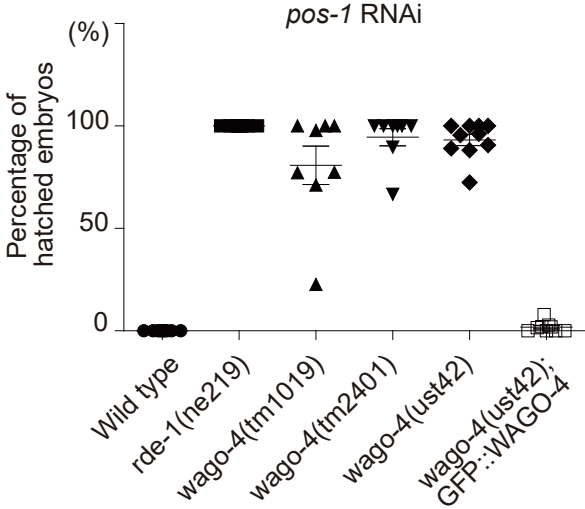

E

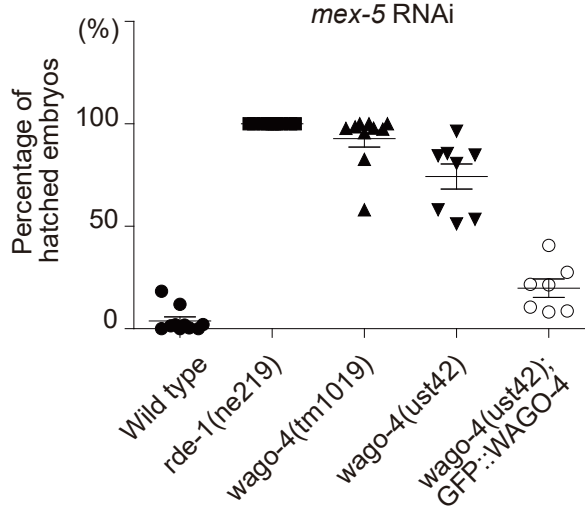

Figure S2

A

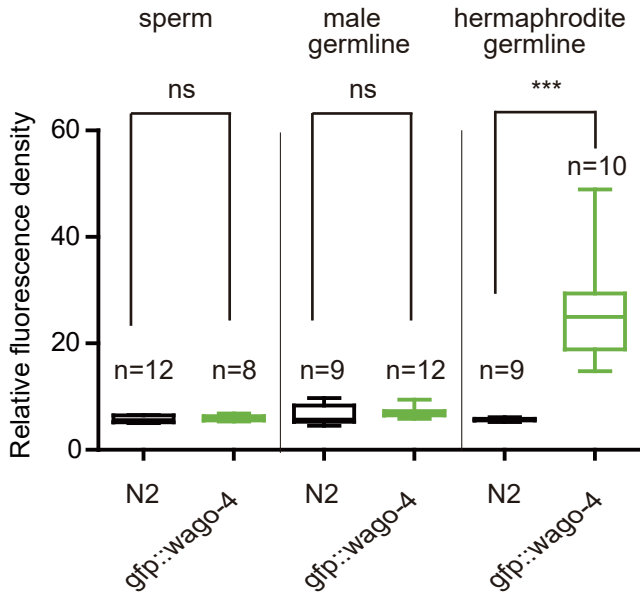

B

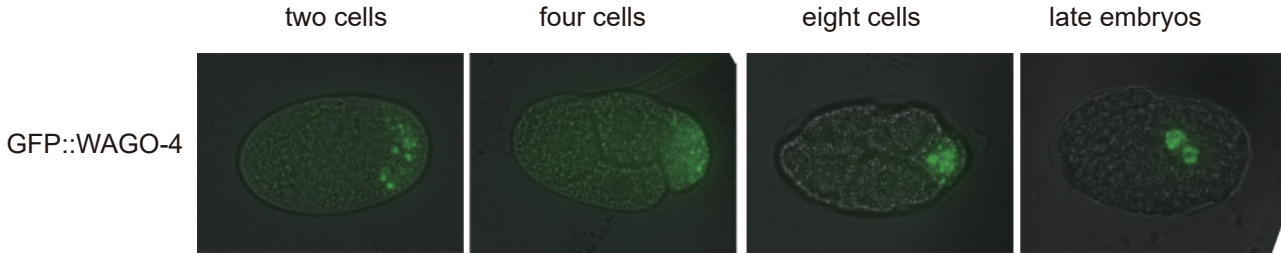

Figure S3

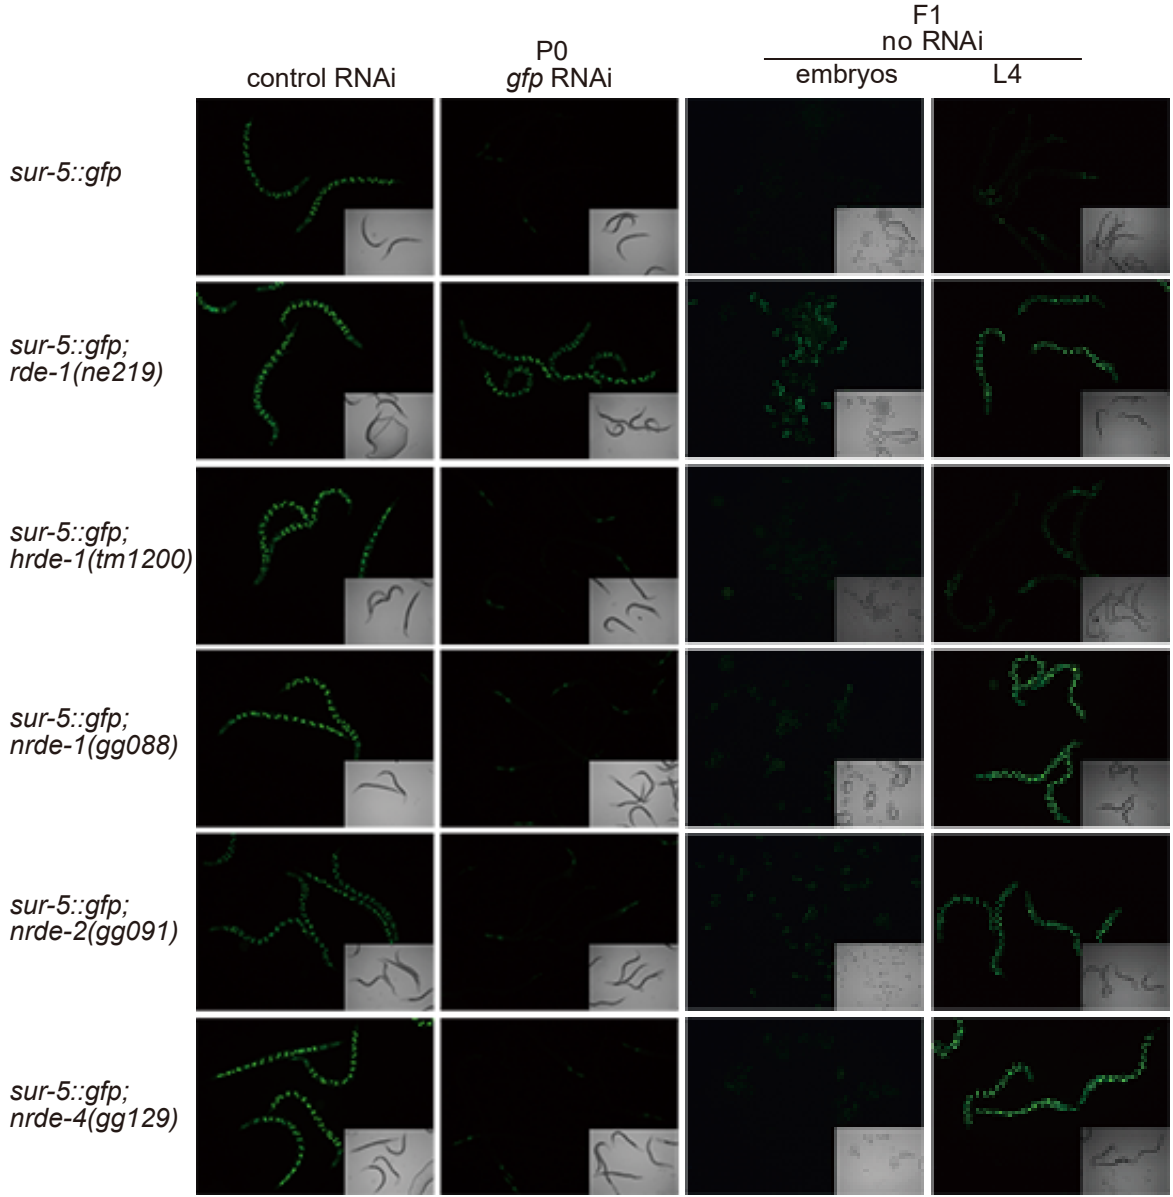

Figure S4

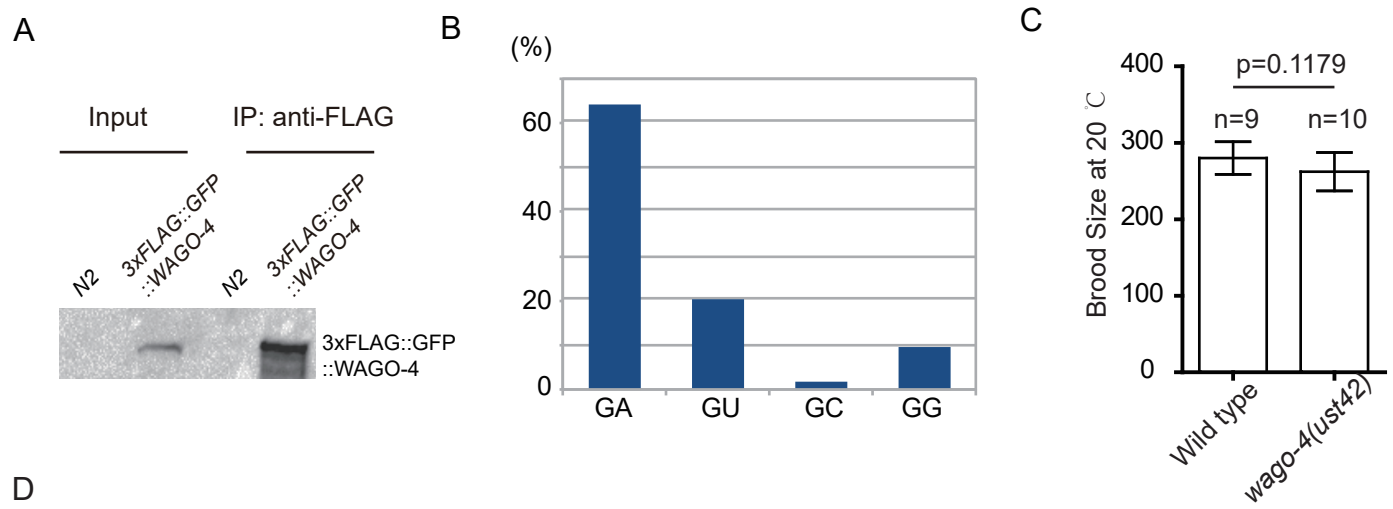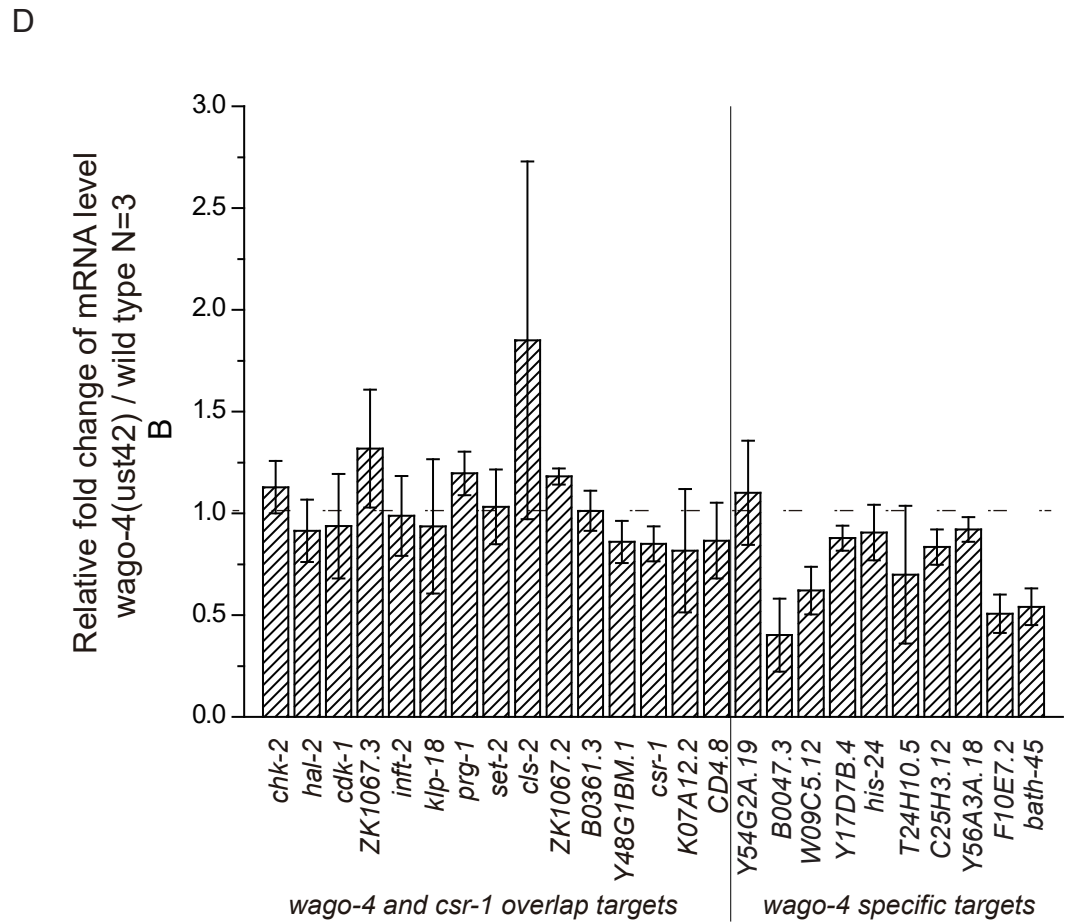

| Gene      | Ranking |
|-----------|---------|
| chk-2     | 1       |
| hal-2     | 8       |
| cdk-1     | 9       |
| ZK1067.3  | 13      |
| inft-2    | 14      |
| klp-18    | 21      |
| prg-1     | 24      |
| set-2     | 26      |
| cls-2     | 27      |
| ZK1067.2  | 28      |
| B0361.3   | 32      |
| Y48G1BM.1 | 47      |
| csr-1     | 205     |
| K07A12.2  | 254     |
| CD4.8     | 700     |
| Y54G2A.19 | 2       |
| B0047.3   | 6       |
| W09C5.12  | 10      |
| Y17D7B.4  | 15      |
| his-24    | 18      |
| T24H10.5  | 22      |
| C25H3.12  | 34      |
| Y56A3A.18 | 37      |
| F10E7.2   | 39      |
| bath-45   | 156     |

Figure S5

A

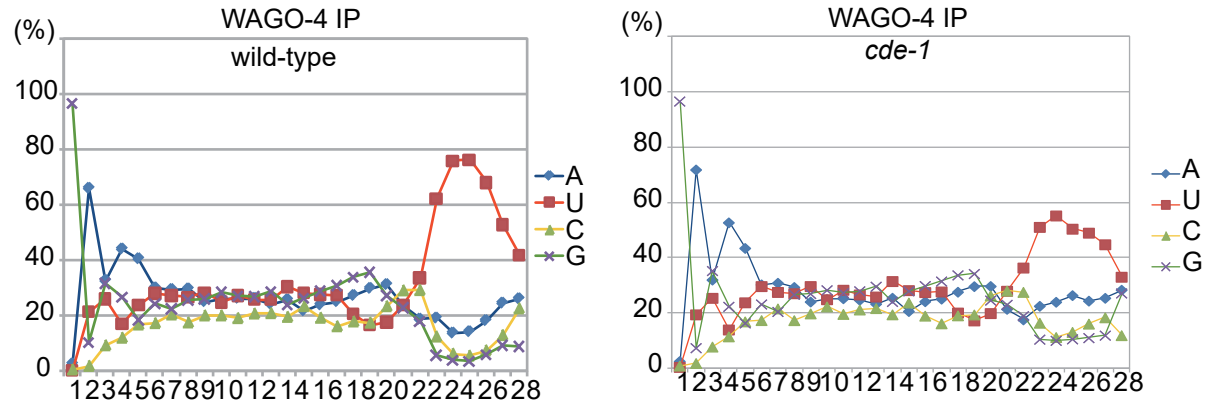

B

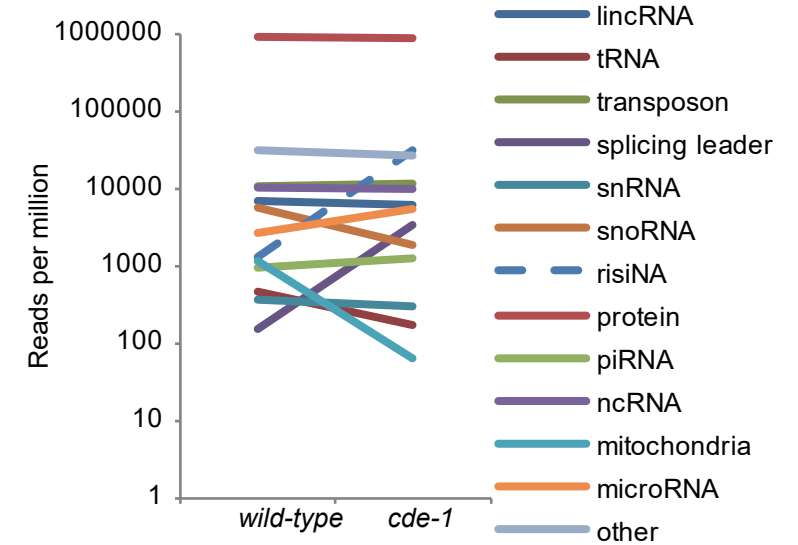

C

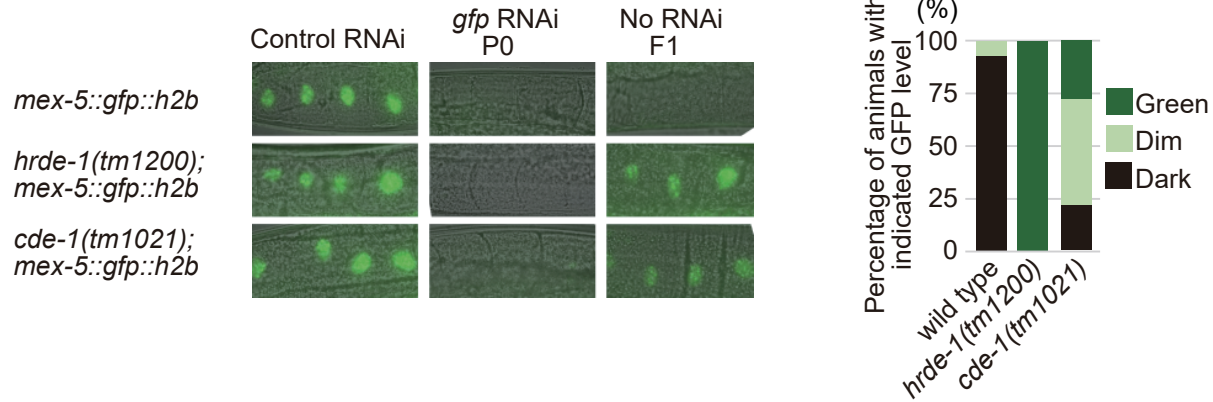

**Table S1: WAGO-4-siRNA targeted genes.**

| Gene ID    | #number of reads | #number of reads per million |
|------------|------------------|------------------------------|
| Y60A3A.12  | 68454            | 5814.489796                  |
| Y54G2A.19  | 58383            | 4959.058021                  |
| Y46G5A.4   | 54191            | 4602.98911                   |
| F32D1.1    | 53772            | 4567.399207                  |
| F07A5.1    | 48419            | 4112.714837                  |
| B0047.3    | 44266            | 3759.95859                   |
| Y106G6H.2  | 36218            | 3076.360643                  |
| T16H12.11  | 35436            | 3009.937482                  |
| T05G5.3    | 34791            | 2955.151116                  |
| W09C5.12   | 34590            | 2938.078155                  |
| F15D3.7    | 33119            | 2813.131264                  |
| F10G7.4    | 31380            | 2665.420425                  |
| ZK1067.3   | 28921            | 2456.552713                  |
| F15B9.4    | 24131            | 2049.68962                   |
| Y17D7B.4   | 23587            | 2003.482204                  |
| K11D9.1    | 21395            | 1817.293499                  |
| M01E11.6   | 20888            | 1774.228867                  |
| M163.3     | 20459            | 1737.789563                  |
| C47G2.8    | 20128            | 1709.674389                  |
| K11D12.2   | 19971            | 1696.338793                  |
| C06G3.2    | 19702            | 1673.489905                  |
| T24H10.5   | 18994            | 1613.352312                  |
| F46F11.9   | 18595            | 1579.461211                  |
| D2030.6    | 18445            | 1566.720196                  |
| Y46G5A.5   | 17970            | 1526.373647                  |
| C26E6.9    | 17899            | 1520.3429                    |
| R107.6     | 17828            | 1514.312152                  |
| ZK1067.2   | 17807            | 1512.52841                   |
| D2096.2    | 17675            | 1501.316317                  |
| F58G1.1    | 17044            | 1447.719112                  |
| K09H11.3   | 16949            | 1439.649802                  |
| B0361.3    | 16778            | 1425.125045                  |
| F58A4.10   | 16572            | 1407.627383                  |
| C25H3.12   | 16109            | 1368.300116                  |
| B0273.3    | 15774            | 1339.845181                  |
| ZK430.1    | 15634            | 1327.953567                  |
| Y56A3A.18  | 15386            | 1306.888421                  |
| T05H10.7   | 15276            | 1297.54501                   |
| F10E7.2    | 14846            | 1261.020766                  |
| B0250.8    | 14511            | 1232.565832                  |
| C36A4.5    | 14508            | 1232.311011                  |
| Y45G5AM.2  | 14428            | 1225.515803                  |
| R06F6.1    | 14411            | 1224.071821                  |
| D2045.2    | 14220            | 1207.848262                  |
| F36A4.7    | 14056            | 1193.918085                  |
| T01G9.2    | 13986            | 1187.972278                  |
| Y48G1BM.1  | 13763            | 1169.030635                  |
| Y55F3AM.10 | 13730            | 1166.227611                  |
| K12D12.5   | 13689            | 1162.745067                  |
| Y48B6A.3   | 13470            | 1144.143185                  |
| C14C11.6   | 13106            | 1113.224987                  |



|             |       |              |
|-------------|-------|--------------|
| F36D4. 3    | 13025 | 1106. 344839 |
| F15E6. 1    | 12862 | 1092. 499602 |
| Y73B6A. 5   | 12859 | 1092. 244782 |
| T01C3. 8    | 12386 | 1052. 068113 |
| Y24D9A. 1   | 12244 | 1040. 006619 |
| Y48G1BL. 2  | 12172 | 1033. 890931 |
| B0432. 2    | 12026 | 1021. 489676 |
| F11A10. 1   | 11930 | 1013. 335426 |
| ZK381. 4    | 11758 | 998. 7257286 |
| T12E12. 3   | 11717 | 995. 2431844 |
| F26D10. 3   | 11648 | 989. 3823173 |
| Y46H3C. 6   | 11627 | 987. 5985751 |
| T05H10. 1   | 11599 | 985. 2202522 |
| F09E5. 10   | 11569 | 982. 6720492 |
| D2096. 1    | 11560 | 981. 9075882 |
| C01G10. 11  | 11427 | 970. 6105546 |
| Y75B8A. 19  | 11422 | 970. 185854  |
| T12F5. 3    | 11373 | 966. 023789  |
| ZK1248. 14  | 11107 | 943. 4297217 |
| B0414. 5    | 11066 | 939. 9471774 |
| Y37A1C. 1   | 11020 | 936. 0399327 |
| Y34D9A. 4   | 11012 | 935. 3604119 |
| ZC317. 1    | 10945 | 929. 669425  |
| W02G9. 5    | 10895 | 925. 4224199 |
| Y43F4B. 6   | 10890 | 924. 9977194 |
| F37D6. 3    | 10812 | 918. 3723913 |
| Y67D8C. 5   | 10775 | 915. 2296075 |
| T05H10. 5   | 10728 | 911. 2374227 |
| C03B8. 4    | 10617 | 901. 8090713 |
| ZK1055. 1   | 10536 | 894. 928923  |
| Y71A12B. 10 | 10499 | 891. 7861392 |
| T05H4. 1    | 10498 | 891. 7011991 |
| Y53F4B. 9   | 10423 | 885. 3306914 |
| C26E6. 3    | 10395 | 882. 9523685 |
| ZK328. 2    | 10373 | 881. 0836862 |
| F34D10. 4   | 10328 | 877. 2613816 |
| F25D7. 4    | 10279 | 873. 0993166 |
| Y39G10AR. 7 | 10257 | 871. 2306343 |
| F29B9. 2    | 10131 | 860. 5281813 |
| F36H1. 2    | 10113 | 858. 9992595 |
| R07H5. 1    | 10057 | 854. 2426137 |
| T20D3. 11   | 9929  | 843. 3702806 |
| Y111B2A. 3  | 9909  | 841. 6714785 |
| Y53C10A. 12 | 9855  | 837. 084713  |
| Y37E3. 15   | 9750  | 828. 1660022 |
| C56C10. 3   | 9717  | 825. 3629788 |
| T09A5. 11   | 9604  | 815. 7647472 |
| Y51H4A. 12  | 9552  | 811. 3478618 |
| F10F2. 1    | 9470  | 804. 3827734 |
| T01E8. 5    | 9402  | 798. 6068464 |
| C03H5. 2    | 9400  | 798. 4369662 |
| Y60A3A. 13  | 9218  | 782. 9778675 |
| F59E12. 6   | 9172  | 779. 0706228 |
| Y49E10. 19  | 9011  | 765. 3952662 |

|            |      |             |
|------------|------|-------------|
| C47D12.6   | 9002 | 764.6308053 |
| C47B2.3    | 8978 | 762.5922428 |
| T08B2.9    | 8888 | 754.9476336 |
| F53F10.2   | 8855 | 752.1446102 |
| Y57G11C.51 | 8840 | 750.8705086 |
| Y54G11A.14 | 8809 | 748.2373655 |
| F22H10.4   | 8793 | 746.8783238 |
| Y48A5A.1   | 8793 | 746.8783238 |
| C41G7.2    | 8784 | 746.1138629 |
| T03F6.5    | 8776 | 745.4343421 |
| T05E7.3    | 8773 | 745.1795218 |
| F13H10.8   | 8719 | 740.5927562 |
| F20C5.3    | 8662 | 735.7511703 |
| F55F10.1   | 8616 | 731.8439256 |
| Y110A7A.18 | 8610 | 731.334285  |
| D1081.9    | 8567 | 727.6818606 |
| F13D12.5   | 8548 | 726.0679986 |
| F48E8.6    | 8484 | 720.6318321 |
| T12E12.2   | 8473 | 719.6974909 |
| T04A8.16   | 8472 | 719.6125508 |
| W03H9.2    | 8414 | 714.6860249 |
| B0228.7    | 8407 | 714.0914441 |
| F59E12.10  | 8396 | 713.157103  |
| Y110A7A.9  | 8361 | 710.1841994 |
| T05A7.4    | 8317 | 706.4468349 |
| T12G3.1    | 8315 | 706.2769547 |
| T19B4.7    | 8151 | 692.3467778 |
| T10G3.5    | 8131 | 690.6479758 |
| C38D4.9    | 8073 | 685.7214498 |
| C14B1.7    | 8068 | 685.2967493 |
| F28H1.3    | 8021 | 681.3045645 |
| C53D5.6    | 7987 | 678.416601  |
| Y81G3A.3   | 7930 | 673.5750151 |
| F02E9.4    | 7905 | 671.4515125 |
| F23B12.8   | 7853 | 667.0346272 |
| K12D12.1   | 7823 | 664.4864241 |
| F11H8.4    | 7799 | 662.4478616 |
| T21E12.4   | 7792 | 661.8532809 |
| C16C10.3   | 7788 | 661.5135205 |
| ZC155.3    | 7717 | 655.4827732 |
| C41D11.1   | 7711 | 654.9731326 |
| C10C5.1    | 7703 | 654.2936118 |
| T14G10.5   | 7688 | 653.0195102 |
| B0491.6    | 7616 | 646.9038228 |
| F37A4.9    | 7614 | 646.7339426 |
| W04B5.5    | 7525 | 639.1742735 |
| C16A11.4   | 7523 | 639.0043933 |
| C32F10.2   | 7503 | 637.3055912 |
| K01G5.7    | 7476 | 635.0122084 |
| T07C4.10   | 7399 | 628.4718205 |
| F29C12.5   | 7388 | 627.5374794 |
| C41C4.4    | 7364 | 625.4989169 |
| C07A9.3    | 7353 | 624.5645758 |
| W04C9.1    | 7351 | 624.3946956 |

|              |      |              |
|--------------|------|--------------|
| C06H2. 2     | 7290 | 619. 2133493 |
| Y48G1C. 1    | 7272 | 617. 6844275 |
| F18A1. 5     | 7225 | 613. 6922426 |
| K08E7. 3     | 7224 | 613. 6073025 |
| Y52B11A. 18  | 7179 | 609. 7849979 |
| Y18D10A. 25  | 7131 | 605. 707873  |
| Y44E3A. 6    | 7125 | 605. 1982324 |
| T01G5. 8     | 7094 | 602. 5650892 |
| F22B5. 7     | 7077 | 601. 1211074 |
| Y22D7AL. 5   | 7026 | 596. 7891622 |
| ZK370. 7     | 6987 | 593. 4764982 |
| C27A2. 2     | 6976 | 592. 542157  |
| F14B4. 3     | 6957 | 590. 9282951 |
| B0250. 5     | 6920 | 587. 7855113 |
| K12H4. 8     | 6920 | 587. 7855113 |
| R12C12. 2    | 6905 | 586. 5114097 |
| W09D10. 2    | 6858 | 582. 5192249 |
| Y56A3A. 5    | 6800 | 577. 592699  |
| F54B3. 1     | 6776 | 575. 5541365 |
| B0205. 9     | 6772 | 575. 2143761 |
| Y71G12B. 8   | 6755 | 573. 7703943 |
| C02F5. 7     | 6733 | 571. 9017121 |
| Y47G6A. 28   | 6730 | 571. 6468918 |
| M04B2. 1     | 6721 | 570. 8824308 |
| T04A11. 6    | 6709 | 569. 8631496 |
| ZK930. 1     | 6691 | 568. 3342278 |
| C04F5. 1     | 6686 | 567. 9095272 |
| Y54E2A. 4    | 6683 | 567. 6547069 |
| F28F8. 5     | 6669 | 566. 4655455 |
| C38D4. 3     | 6647 | 564. 5968632 |
| F26G5. 9     | 6633 | 563. 4077018 |
| T05A6. 2     | 6631 | 563. 2378216 |
| T12D8. 1     | 6621 | 562. 3884206 |
| F37A4. 8     | 6583 | 559. 1606967 |
| C01H6. 5     | 6569 | 557. 9715352 |
| C18G1. 4     | 6558 | 557. 0371941 |
| F57B9. 5     | 6551 | 556. 4426134 |
| ZK973. 2     | 6538 | 555. 338392  |
| Y73B6BL. 5   | 6526 | 554. 3191108 |
| Y110A7A. 1   | 6523 | 554. 0642905 |
| C14B9. 4     | 6474 | 549. 9022254 |
| C04G6. 3     | 6462 | 548. 8829442 |
| T20G5. 11    | 6458 | 548. 5431838 |
| Y48E1A. 1    | 6417 | 545. 0606396 |
| F23H11. 2    | 6372 | 541. 238335  |
| F20D12. 1    | 6358 | 540. 0491735 |
| Y43F11A. 5   | 6356 | 539. 8792933 |
| K10D2. 3     | 6333 | 537. 925671  |
| R05D11. 8    | 6325 | 537. 2461501 |
| Y40B10A. 8   | 6280 | 533. 4238455 |
| C33E10. 2    | 6250 | 530. 8756424 |
| F54C8. 4     | 6246 | 530. 535882  |
| F10G7. 3     | 6204 | 526. 9683977 |
| Y39G10AR. 18 | 6187 | 525. 5244159 |

|             |      |              |
|-------------|------|--------------|
| Y92H12BR. 3 | 6154 | 522. 7213926 |
| ZK945. 3    | 6145 | 521. 9569316 |
| C18A3. 5    | 6137 | 521. 2774108 |
| Y49E10. 17  | 6124 | 520. 1731895 |
| C09G5. 2    | 6119 | 519. 748489  |
| R01H2. 6    | 6100 | 518. 134627  |
| F37B12. 3   | 6069 | 515. 5014838 |
| F49E8. 3    | 6034 | 512. 5285802 |
| C49H3. 8    | 6033 | 512. 4436401 |
| C18H2. 2    | 6017 | 511. 0845985 |
| F54D7. 2    | 6011 | 510. 5749579 |
| R09B3. 5    | 6002 | 509. 8104969 |
| F55A3. 3    | 5993 | 509. 046036  |
| F56A3. 4    | 5976 | 507. 6020543 |
| C17E4. 3    | 5969 | 507. 0074735 |
| C02F5. 1    | 5962 | 506. 4128928 |
| C32B5. 6    | 5958 | 506. 0731324 |
| R06C7. 8    | 5950 | 505. 3936116 |
| Y75B8A. 13  | 5950 | 505. 3936116 |
| B0280. 9    | 5949 | 505. 3086715 |
| R151. 10    | 5946 | 505. 0538512 |
| Y71A12B. 17 | 5935 | 504. 11951   |
| T22F3. 4    | 5922 | 503. 0152887 |
| C16A11. 9   | 5870 | 498. 5984034 |
| F08D12. 1   | 5866 | 498. 258643  |
| Y71F9AL. 9  | 5825 | 494. 7760987 |
| K04C2. 3    | 5812 | 493. 6718774 |
| C47D12. 1   | 5811 | 493. 5869373 |
| F58G11. 3   | 5811 | 493. 5869373 |
| K08E5. 1    | 5810 | 493. 5019972 |
| C15H11. 5   | 5803 | 492. 9074165 |
| T19B10. 11  | 5795 | 492. 2278957 |
| F48C1. 6    | 5787 | 491. 5483748 |
| T26A5. 5    | 5764 | 489. 5947525 |
| C26H9A. 1   | 5758 | 489. 0851119 |
| C03C10. 1   | 5756 | 488. 9152316 |
| Y92H12A. 5  | 5751 | 488. 4905311 |
| B0035. 11   | 5746 | 488. 0658306 |
| Y113G7B. 17 | 5709 | 484. 9230468 |
| F25H5. 5    | 5700 | 484. 1585859 |
| K07A12. 2   | 5685 | 482. 8844843 |
| Y73B6BL. 23 | 5675 | 482. 0350833 |
| Y92H12BR. 2 | 5662 | 480. 930862  |
| H28016. 2   | 5629 | 478. 1278386 |
| R10E11. 1   | 5607 | 476. 2591563 |
| Y67D8C. 6   | 5595 | 475. 2398751 |
| B0336. 3    | 5588 | 474. 6452944 |
| T09A5. 10   | 5579 | 473. 8808335 |
| F17A9. 2    | 5567 | 472. 8615522 |
| R05F9. 11   | 5548 | 471. 2476903 |
| T28A8. 6    | 5539 | 470. 4832293 |
| Y41E3. 11   | 5527 | 469. 4639481 |
| Y48G1BM. 6  | 5503 | 467. 4253856 |
| C07A9. 7    | 5502 | 467. 3404455 |

|            |      |              |
|------------|------|--------------|
| ZK328. 1   | 5495 | 466. 7458648 |
| R07H5. 8   | 5493 | 466. 5759846 |
| C50C3. 6   | 5470 | 464. 6223622 |
| F58B6. 3   | 5457 | 463. 5181409 |
| F59A2. 1   | 5441 | 462. 1590993 |
| F41H10. 10 | 5438 | 461. 904279  |
| T22D1. 9   | 5436 | 461. 7343988 |
| K04D7. 1   | 5420 | 460. 3753571 |
| F55H2. 6   | 5416 | 460. 0355967 |
| Y38F2AR. 7 | 5411 | 459. 6108962 |
| T23H2. 1   | 5409 | 459. 441016  |
| C47D12. 2  | 5406 | 459. 1861957 |
| C14B9. 8   | 5382 | 457. 1476332 |
| K08E3. 3   | 5382 | 457. 1476332 |
| T08D2. 7   | 5370 | 456. 128352  |
| Y7A5A. 10  | 5367 | 455. 8735317 |
| W09H1. 5   | 5355 | 454. 8542504 |
| ZK1098. 8  | 5352 | 454. 5994301 |
| Y65B4BR. 4 | 5345 | 454. 0048494 |
| T21G5. 3   | 5335 | 453. 1554484 |
| F10C5. 2   | 5311 | 451. 1168859 |
| H04D03. 2  | 5288 | 449. 1632635 |
| Y92H12A. 4 | 5288 | 449. 1632635 |
| W05F2. 5   | 5274 | 447. 9741021 |
| F01G4. 6   | 5262 | 446. 9548209 |
| C28C12. 2  | 5250 | 445. 9355396 |
| H02I12. 1  | 5229 | 444. 1517975 |
| C24G6. 8   | 5225 | 443. 8120371 |
| D1054. 15  | 5194 | 441. 1788939 |
| F56A3. 3   | 5186 | 440. 4993731 |
| F10G7. 1   | 5185 | 440. 414433  |
| ZK177. 6   | 5174 | 439. 4800918 |
| C35D10. 7  | 5160 | 438. 2909304 |
| H20J04. 5  | 5159 | 438. 2059903 |
| C10C5. 6   | 5156 | 437. 95117   |
| R05D11. 3  | 5136 | 436. 2523679 |
| Y73B3A. 1  | 5131 | 435. 8276674 |
| F01G4. 4   | 5109 | 433. 9589851 |
| F32D1. 10  | 5109 | 433. 9589851 |
| F33A8. 4   | 5097 | 432. 9397039 |
| F59C12. 4  | 5091 | 432. 4300633 |
| Y102A5A. 1 | 5086 | 432. 0053628 |
| Y32F6A. 3  | 5086 | 432. 0053628 |
| F37H8. 2   | 5084 | 431. 8354826 |
| Y77E11A. 3 | 5084 | 431. 8354826 |
| C34D4. 14  | 5047 | 428. 6926988 |
| F01G10. 1  | 5041 | 428. 1830582 |
| Y55F3AR. 3 | 5033 | 427. 5035373 |
| T24C4. 7   | 5030 | 427. 248717  |
| ZK270. 2   | 5020 | 426. 399316  |
| DY3. 2     | 5016 | 426. 0595556 |
| W09C5. 2   | 5004 | 425. 0402743 |
| K10C3. 4   | 4996 | 424. 3607535 |
| R05D3. 2   | 4987 | 423. 5962926 |

|             |      |              |
|-------------|------|--------------|
| C44E4. 3    | 4971 | 422. 237251  |
| T23G5. 2    | 4965 | 421. 7276103 |
| F53C11. 5   | 4958 | 421. 1330296 |
| F01F1. 6    | 4948 | 420. 2836286 |
| F33G12. 4   | 4946 | 420. 1137484 |
| T23D8. 9    | 4940 | 419. 6041078 |
| C45G3. 1    | 4936 | 419. 2643474 |
| ZC404. 8    | 4924 | 418. 2450661 |
| T11G6. 5    | 4902 | 416. 3763839 |
| ZK328. 5    | 4890 | 415. 3571026 |
| B0432. 13   | 4876 | 414. 1679412 |
| C16A3. 1    | 4874 | 413. 998061  |
| F43E2. 1    | 4862 | 412. 9787798 |
| R166. 2     | 4849 | 411. 8745584 |
| K11H3. 1    | 4835 | 410. 685397  |
| F53A3. 4    | 4827 | 410. 0058762 |
| D1081. 7    | 4823 | 409. 6661157 |
| F58D5. 1    | 4818 | 409. 2414152 |
| C38C10. 5   | 4816 | 409. 071535  |
| C36A4. 11   | 4802 | 407. 8823736 |
| Y66H1B. 2   | 4801 | 407. 7974335 |
| Y87G2A. 17  | 4801 | 407. 7974335 |
| F57C2. 5    | 4799 | 407. 6275533 |
| M03D4. 1    | 4799 | 407. 6275533 |
| F59H6. 14   | 4790 | 406. 8630924 |
| C10H11. 10  | 4785 | 406. 4383918 |
| C04F12. 9   | 4780 | 406. 0136913 |
| K01G5. 2    | 4773 | 405. 4191106 |
| Y34D9A. 3   | 4772 | 405. 3341705 |
| B0511. 13   | 4768 | 404. 9944101 |
| C10H11. 9   | 4764 | 404. 6546497 |
| B0207. 4    | 4763 | 404. 5697096 |
| Y48G9A. 3   | 4752 | 403. 6353684 |
| EEED8. 10   | 4748 | 403. 295608  |
| C05C8. 4    | 4746 | 403. 1257278 |
| D2005. 4    | 4737 | 402. 3612669 |
| ZK1251. 9   | 4737 | 402. 3612669 |
| Y82E9BR. 18 | 4734 | 402. 1064466 |
| T24F1. 1    | 4733 | 402. 0215065 |
| K10B2. 5    | 4730 | 401. 7666862 |
| Y104H12D. 4 | 4725 | 401. 3419857 |
| F15B10. 1   | 4721 | 401. 0022253 |
| F38H4. 7    | 4721 | 401. 0022253 |
| F56D2. 6    | 4703 | 399. 4733034 |
| K10C8. 1    | 4693 | 398. 6239024 |
| Y73B6BL. 38 | 4685 | 397. 9443816 |
| F58E10. 3   | 4675 | 397. 0949805 |
| R10E4. 9    | 4669 | 396. 5853399 |
| Y119D3B. 16 | 4651 | 395. 0564181 |
| T09F5. 12   | 4623 | 392. 6780952 |
| T02G5. 13   | 4616 | 392. 0835145 |
| ZK1290. 4   | 4616 | 392. 0835145 |
| F54F2. 2    | 4609 | 391. 4889337 |
| E01A2. 2    | 4605 | 391. 1491733 |

|              |      |              |
|--------------|------|--------------|
| T19H12. 2    | 4605 | 391. 1491733 |
| T27E9. 1     | 4602 | 390. 894353  |
| Y65B4BL. 2   | 4591 | 389. 9600119 |
| R05G6. 7     | 4576 | 388. 6859104 |
| T14G10. 2    | 4555 | 386. 9021682 |
| W03G9. 3     | 4554 | 386. 8172281 |
| C34H4. 5     | 4548 | 386. 3075875 |
| T23G5. 6     | 4536 | 385. 2883062 |
| Y61A9LA. 8   | 4535 | 385. 2033661 |
| F09E8. 3     | 4526 | 384. 4389052 |
| C43E11. 4    | 4520 | 383. 9292646 |
| F32E10. 2    | 4520 | 383. 9292646 |
| B0414. 7     | 4518 | 383. 7593844 |
| T01C8. 5     | 4470 | 379. 6822595 |
| H27M09. 2    | 4460 | 378. 8328584 |
| T01G9. 4     | 4444 | 377. 4738168 |
| R11A8. 1     | 4443 | 377. 3888767 |
| C06A8. 5     | 4441 | 377. 2189965 |
| M18. 7       | 4436 | 376. 794296  |
| R06A4. 8     | 4424 | 375. 7750147 |
| K08A2. 5     | 4414 | 374. 9256137 |
| Y62E10A. 20  | 4413 | 374. 8406736 |
| Y110A7A. 17  | 4405 | 374. 1611528 |
| C26C6. 5     | 4395 | 373. 3117518 |
| ZK896. 9     | 4395 | 373. 3117518 |
| Y49E10. 20   | 4390 | 372. 8870512 |
| C04H5. 6     | 4376 | 371. 6978898 |
| R07B7. 2     | 4372 | 371. 3581294 |
| Y71A12B. 9   | 4364 | 370. 6786086 |
| F16A11. 3    | 4359 | 370. 2539081 |
| D2096. 8     | 4351 | 369. 5743872 |
| F53G12. 1    | 4346 | 369. 1496867 |
| F28D1. 10    | 4342 | 368. 8099263 |
| T06E4. 3     | 4339 | 368. 555106  |
| K07C5. 6     | 4329 | 367. 705705  |
| Y39G10AR. 21 | 4326 | 367. 4508847 |
| Y48G1A. 5    | 4318 | 366. 7713638 |
| C13B4. 1     | 4315 | 366. 5165435 |
| M01G5. 5     | 4313 | 366. 3466633 |
| R07B7. 1     | 4312 | 366. 2617232 |
| E04D5. 1     | 4303 | 365. 4972623 |
| W06H3. 2     | 4303 | 365. 4972623 |
| F10B5. 8     | 4296 | 364. 9026816 |
| C18E3. 6     | 4291 | 364. 4779811 |
| F31C3. 2     | 4288 | 364. 2231608 |
| C26D10. 1    | 4277 | 363. 2888196 |
| C44E4. 1     | 4260 | 361. 8448379 |
| C33H5. 11    | 4244 | 360. 4857962 |
| T19A5. 2     | 4232 | 359. 466515  |
| Y102E9. 2    | 4223 | 358. 7020541 |
| C12D8. 11    | 4200 | 356. 7484317 |
| C46F11. 5    | 4196 | 356. 4086713 |
| T18H9. 7     | 4188 | 355. 7291505 |
| F10E7. 8     | 4185 | 355. 4743302 |

|              |      |              |
|--------------|------|--------------|
| F20G4. 3     | 4173 | 354. 4550489 |
| T03F1. 9     | 4173 | 354. 4550489 |
| R11A8. 6     | 4171 | 354. 2851687 |
| F40F11. 2    | 4170 | 354. 2002286 |
| Y14H12B. 2   | 4170 | 354. 2002286 |
| Y39A3CL. 1   | 4158 | 353. 1809474 |
| F55F8. 9     | 4154 | 352. 841187  |
| T05F1. 1     | 4153 | 352. 7562469 |
| T22F3. 3     | 4134 | 351. 1423849 |
| Y57A10A. 4   | 4132 | 350. 9725047 |
| R05D3. 7     | 4126 | 350. 4628641 |
| C14A4. 5     | 4125 | 350. 377924  |
| Y59E9AL. 36  | 4112 | 349. 2737027 |
| Y43H11AL. 3  | 4100 | 348. 2544214 |
| T05E11. 6    | 4091 | 347. 4899605 |
| W02D3. 1     | 4090 | 347. 4050204 |
| F44B9. 3     | 4077 | 346. 3007991 |
| C27B7. 4     | 4069 | 345. 6212782 |
| B0365. 3     | 4068 | 345. 5363381 |
| Y18D10A. 9   | 4061 | 344. 9417574 |
| F56C9. 3     | 4060 | 344. 8568173 |
| B0464. 5     | 4059 | 344. 7718772 |
| F38E11. 5    | 4048 | 343. 8375361 |
| T24H7. 1     | 4046 | 343. 6676559 |
| B0047. 1     | 4029 | 342. 2236741 |
| JC8. 6       | 4029 | 342. 2236741 |
| F36F2. 3     | 4006 | 340. 2700518 |
| Y2H9A. 1     | 3993 | 339. 1658304 |
| Y37H9A. 2    | 3989 | 338. 82607   |
| F58A4. 3     | 3988 | 338. 7411299 |
| M7. 2        | 3976 | 337. 7218487 |
| Y57G11C. 499 | 3961 | 336. 4477471 |
| F26A3. 3     | 3947 | 335. 2585857 |
| R11A8. 7     | 3940 | 334. 664005  |
| C26B2. 1     | 3928 | 333. 6447238 |
| F32E10. 4    | 3913 | 332. 3706222 |
| F25D1. 1     | 3910 | 332. 1158019 |
| T13F2. 3     | 3904 | 331. 6061613 |
| Y59A8A. 2    | 3897 | 331. 0115806 |
| K07C5. 3     | 3889 | 330. 3320597 |
| F54E12. 2    | 3886 | 330. 0772394 |
| T23B12. 2    | 3869 | 328. 6332577 |
| W02B12. 9    | 3869 | 328. 6332577 |
| F55G1. 8     | 3864 | 328. 2085572 |
| C25D7. 6     | 3862 | 328. 038677  |
| F20H11. 2    | 3851 | 327. 1043358 |
| F21H12. 5    | 3847 | 326. 7645754 |
| Y110A7A. 21  | 3837 | 325. 9151744 |
| C38D4. 5     | 3835 | 325. 7452942 |
| M03C11. 8    | 3823 | 324. 726013  |
| F46F3. 4     | 3821 | 324. 5561328 |
| Y6D1A. 1     | 3821 | 324. 5561328 |
| R01H10. 7    | 3804 | 323. 112151  |
| B0334. 15    | 3790 | 321. 9229896 |



|              |      |              |
|--------------|------|--------------|
| F12F6. 6     | 3787 | 321. 6681693 |
| B0250. 7     | 3785 | 321. 4982891 |
| Y54E2A. 12   | 3785 | 321. 4982891 |
| Y55D5A. 5    | 3784 | 321. 4133489 |
| K05C4. 2     | 3771 | 320. 3091276 |
| F35G12. 8    | 3767 | 319. 9693672 |
| C52E12. 4    | 3765 | 319. 799487  |
| T27C4. 4     | 3764 | 319. 7145469 |
| K02F2. 4     | 3759 | 319. 2898464 |
| T25G3. 2     | 3755 | 318. 950086  |
| Y57G11C. 43  | 3748 | 318. 3555052 |
| C47E8. 8     | 3743 | 317. 9308047 |
| Y18D10A. 17  | 3740 | 317. 6759844 |
| Y113G7A. 3   | 3733 | 317. 0814037 |
| H28O16. 1    | 3731 | 316. 9115235 |
| T28A8. 7     | 3730 | 316. 8265834 |
| Y71G12B. 13  | 3730 | 316. 8265834 |
| C23G10. 4    | 3723 | 316. 2320027 |
| Y71G12A. 2   | 3722 | 316. 1470626 |
| C25A1. 1     | 3715 | 315. 5524819 |
| C56G2. 7     | 3715 | 315. 5524819 |
| T07G12. 12   | 3711 | 315. 2127214 |
| F28F8. 9     | 3707 | 314. 872961  |
| Y73E7A. 2    | 3692 | 313. 5988595 |
| D2005. 7     | 3690 | 313. 4289793 |
| F46B6. 4     | 3685 | 313. 0042788 |
| ZK1236. 6    | 3684 | 312. 9193387 |
| F26E4. 8     | 3682 | 312. 7494585 |
| W03G1. 6     | 3681 | 312. 6645184 |
| Y95B8A. 5    | 3681 | 312. 6645184 |
| F26H11. 2    | 3680 | 312. 5795783 |
| ZK856. 12    | 3678 | 312. 4096981 |
| C28A5. 2     | 3677 | 312. 324758  |
| F55A3. 6     | 3663 | 311. 1355965 |
| ZK370. 3     | 3648 | 309. 861495  |
| C38D4. 4     | 3645 | 309. 6066747 |
| T10B11. 7    | 3642 | 309. 3518544 |
| K09B11. 9    | 3637 | 308. 9271538 |
| T24B8. 7     | 3637 | 308. 9271538 |
| F52B5. 3     | 3633 | 308. 5873934 |
| LLC1. 3      | 3633 | 308. 5873934 |
| F53H1. 4     | 3631 | 308. 4175132 |
| Y39G10AR. 13 | 3628 | 308. 1626929 |
| Y54E5B. 1    | 3622 | 307. 6530523 |
| F28D9. 4     | 3613 | 306. 8885914 |
| Y57A10A. 1   | 3613 | 306. 8885914 |
| ZK593. 5     | 3613 | 306. 8885914 |
| F33A8. 1     | 3606 | 306. 2940107 |
| C13F10. 4    | 3605 | 306. 2090705 |
| B0336. 1     | 3601 | 305. 8693101 |
| C07E3. 2     | 3601 | 305. 8693101 |
| M18. 5       | 3591 | 305. 0199091 |
| C48B4. 4     | 3590 | 304. 934969  |
| C02F4. 1     | 3583 | 304. 3403883 |

|             |      |              |
|-------------|------|--------------|
| T26C5. 3    | 3574 | 303. 5759274 |
| F26A3. 8    | 3572 | 303. 4060472 |
| W02A11. 1   | 3566 | 302. 8964065 |
| C17H12. 2   | 3559 | 302. 3018258 |
| Y37E3. 1    | 3559 | 302. 3018258 |
| K07C5. 4    | 3558 | 302. 2168857 |
| Y47G6A. 12  | 3552 | 301. 7072451 |
| W08F4. 3    | 3548 | 301. 3674847 |
| C03D6. 4    | 3539 | 300. 6030238 |
| C16A3. 10   | 3538 | 300. 5180837 |
| R12E2. 10   | 3536 | 300. 3482035 |
| F15D4. 5    | 3531 | 299. 9235029 |
| H12I13. 4   | 3529 | 299. 7536227 |
| C28A5. 1    | 3526 | 299. 4988024 |
| M01G5. 1    | 3520 | 298. 9891618 |
| C04G2. 10   | 3511 | 298. 2247009 |
| Y71G10AL. 1 | 3511 | 298. 2247009 |
| Y67H2A. 7   | 3508 | 297. 9698806 |
| C05D2. 5    | 3506 | 297. 8000004 |
| C37A2. 4    | 3505 | 297. 7150603 |
| Y20F4. 4    | 3505 | 297. 7150603 |
| Y71F9B. 7   | 3505 | 297. 7150603 |
| Y105E8A. 28 | 3503 | 297. 5451801 |
| W01B11. 3   | 3498 | 297. 1204796 |
| C54G10. 3   | 3491 | 296. 5258988 |
| F18A1. 3    | 3490 | 296. 4409587 |
| F33H2. 5    | 3489 | 296. 3560186 |
| W09D10. 1   | 3489 | 296. 3560186 |
| T27E9. 4    | 3481 | 295. 6764978 |
| B0001. 3    | 3468 | 294. 5722765 |
| B0334. 5    | 3468 | 294. 5722765 |
| F08G5. 1    | 3468 | 294. 5722765 |
| K07C5. 8    | 3464 | 294. 2325161 |
| ZK856. 13   | 3460 | 293. 8927556 |
| F54F2. 7    | 3458 | 293. 7228754 |
| T20D3. 8    | 3455 | 293. 4680551 |
| T07E3. 3    | 3452 | 293. 2132348 |
| C38C10. 4   | 3450 | 293. 0433546 |
| F57B9. 6    | 3450 | 293. 0433546 |
| F25B5. 2    | 3440 | 292. 1939536 |
| ZK973. 1    | 3437 | 291. 9391333 |
| C43E11. 3   | 3433 | 291. 5993729 |
| C18G1. 5    | 3416 | 290. 1553911 |
| F22B3. 4    | 3408 | 289. 4758703 |
| M110. 4     | 3406 | 289. 3059901 |
| C16C10. 1   | 3399 | 288. 7114094 |
| ZK112. 2    | 3398 | 288. 6264693 |
| Y38H8A. 12  | 3397 | 288. 5415292 |
| R74. 8      | 3396 | 288. 4565891 |
| Y38F1A. 10  | 3396 | 288. 4565891 |
| Y77E11A. 13 | 3394 | 288. 2867089 |
| F36H2. 1    | 3393 | 288. 2017688 |
| Y48G1BL. 1  | 3393 | 288. 2017688 |
| F09G2. 2    | 3391 | 288. 0318886 |

|             |      |              |
|-------------|------|--------------|
| Y38C9A. 1   | 3389 | 287. 8620083 |
| R05D3. 4    | 3387 | 287. 6921281 |
| T17E9. 2    | 3385 | 287. 5222479 |
| B0414. 8    | 3384 | 287. 4373078 |
| T07A9. 9    | 3384 | 287. 4373078 |
| K04G7. 3    | 3383 | 287. 3523677 |
| F54E7. 3    | 3380 | 287. 0975474 |
| F09G2. 4    | 3375 | 286. 6728469 |
| C04G6. 6    | 3371 | 286. 3330865 |
| R12B2. 5    | 3371 | 286. 3330865 |
| F52A8. 6    | 3359 | 285. 3138053 |
| Y53C12A. 10 | 3355 | 284. 9740449 |
| Y39E4B. 3   | 3344 | 284. 0397037 |
| T23D8. 4    | 3334 | 283. 1903027 |
| C05D11. 11  | 3329 | 282. 7656022 |
| Y42H9B. 2   | 3327 | 282. 595722  |
| F52C12. 6   | 3326 | 282. 5107819 |
| W02B8. 2    | 3325 | 282. 4258418 |
| B0361. 6    | 3324 | 282. 3409017 |
| K01G5. 6    | 3322 | 282. 1710215 |
| Y54F10AL. 2 | 3312 | 281. 3216204 |
| C27D9. 1    | 3308 | 280. 98186   |
| T23F6. 4    | 3305 | 280. 7270397 |
| F56G4. 6    | 3299 | 280. 2173991 |
| Y111B2A. 18 | 3297 | 280. 0475189 |
| F26G1. 1    | 3294 | 279. 7926986 |
| Y41D4B. 13  | 3294 | 279. 7926986 |
| T06E4. 1    | 3290 | 279. 4529382 |
| K07D4. 3    | 3288 | 279. 283058  |
| T26A8. 4    | 3288 | 279. 283058  |
| K07F5. 15   | 3287 | 279. 1981179 |
| Y37E11B. 2  | 3286 | 279. 1131778 |
| C01F6. 4    | 3282 | 278. 7734173 |
| F25H5. 4    | 3281 | 278. 6884772 |
| W09B6. 1    | 3278 | 278. 4336569 |
| B0280. 10   | 3273 | 278. 0089564 |
| B0001. 5    | 3270 | 277. 7541361 |
| C42C1. 10   | 3268 | 277. 5842559 |
| VF13D12L. 1 | 3256 | 276. 5649747 |
| C17G10. 9   | 3253 | 276. 3101544 |
| F21D5. 6    | 3248 | 275. 8854539 |
| F55A3. 7    | 3247 | 275. 8005138 |
| Y57G11C. 15 | 3247 | 275. 8005138 |
| C01G5. 2    | 3246 | 275. 7155736 |
| C29E4. 4    | 3246 | 275. 7155736 |
| Y17G7B. 5   | 3237 | 274. 9511127 |
| T11F8. 3    | 3236 | 274. 8661726 |
| R144. 9     | 3235 | 274. 7812325 |
| F26F12. 7   | 3226 | 274. 0167716 |
| R06F6. 2    | 3226 | 274. 0167716 |
| C01H6. 9    | 3224 | 273. 8468914 |
| T12A2. 7    | 3224 | 273. 8468914 |
| F49F1. 8    | 3220 | 273. 507131  |
| R151. 2     | 3215 | 273. 0824305 |

|             |      |              |
|-------------|------|--------------|
| ZK688. 5    | 3208 | 272. 4878497 |
| T20B12. 1   | 3207 | 272. 4029096 |
| B0001. 7    | 3202 | 271. 9782091 |
| W03H9. 4    | 3199 | 271. 7233888 |
| Y48B6A. 2   | 3194 | 271. 2986883 |
| B0280. 1    | 3192 | 271. 1288081 |
| Y37E11B. 4  | 3192 | 271. 1288081 |
| Y73B6BL. 6  | 3191 | 271. 043868  |
| Y71H2B. 6   | 3189 | 270. 8739878 |
| Y48A6B. 11  | 3188 | 270. 7890477 |
| F19F10. 12  | 3186 | 270. 6191675 |
| Y37D8A. 12  | 3183 | 270. 3643472 |
| Y71D11A. 2  | 3178 | 269. 9396467 |
| D2089. 1    | 3177 | 269. 8547066 |
| Y71H2B. 10  | 3172 | 269. 430006  |
| F52C6. 2    | 3169 | 269. 1751857 |
| C06A1. 1    | 3166 | 268. 9203654 |
| C06A5. 1    | 3164 | 268. 7504852 |
| K08F11. 3   | 3158 | 268. 2408446 |
| F45E12. 3   | 3153 | 267. 8161441 |
| C25H3. 8    | 3152 | 267. 731204  |
| C36A4. 8    | 3152 | 267. 731204  |
| F53G12. 10  | 3146 | 267. 2215634 |
| K04D7. 5    | 3144 | 267. 0516832 |
| F59A6. 5    | 3141 | 266. 7968629 |
| R05G6. 8    | 3140 | 266. 7119228 |
| R11A8. 4    | 3139 | 266. 6269827 |
| Y48G1C. 2   | 3132 | 266. 0324019 |
| C30C11. 4   | 3126 | 265. 5227613 |
| K06B9. 6    | 3122 | 265. 1830009 |
| C15F1. 3    | 3119 | 264. 9281806 |
| C13B4. 2    | 3115 | 264. 5884202 |
| F13G3. 7    | 3113 | 264. 41854   |
| Y46G5A. 31  | 3108 | 263. 9938395 |
| Y75B8A. 22  | 3106 | 263. 8239593 |
| T23B12. 4   | 3103 | 263. 569139  |
| F28D9. 1    | 3094 | 262. 804678  |
| C47E8. 5    | 3092 | 262. 6347978 |
| T05C12. 6   | 3092 | 262. 6347978 |
| F56F11. 3   | 3089 | 262. 3799775 |
| T05G5. 10   | 3079 | 261. 5305765 |
| F13A7. 11   | 3078 | 261. 4456364 |
| M02B7. 3    | 3078 | 261. 4456364 |
| F15D4. 1    | 3074 | 261. 105876  |
| C16A3. 3    | 3069 | 260. 6811755 |
| F22B7. 13   | 3066 | 260. 4263551 |
| W08A12. 1   | 3065 | 260. 341415  |
| F57B10. 10  | 3061 | 260. 0016546 |
| F02A9. 6    | 3060 | 259. 9167145 |
| F19F10. 10  | 3058 | 259. 7468343 |
| F28B12. 3   | 3058 | 259. 7468343 |
| Y46E12BL. 2 | 3058 | 259. 7468343 |
| W02B12. 3   | 3057 | 259. 6618942 |
| C01F6. 14   | 3055 | 259. 492014  |

|             |      |              |
|-------------|------|--------------|
| CD4. 8      | 3051 | 259. 1522536 |
| T04C9. 1    | 3045 | 258. 642613  |
| Y54F10BM. 9 | 3045 | 258. 642613  |
| ZC395. 8    | 3043 | 258. 4727328 |
| F57C9. 4    | 3042 | 258. 3877927 |
| C16A3. 7    | 3038 | 258. 0480323 |
| K05C4. 5    | 3038 | 258. 0480323 |
| W10C6. 1    | 3038 | 258. 0480323 |
| Y53C12B. 1  | 3038 | 258. 0480323 |
| C27F2. 8    | 3037 | 257. 9630922 |
| F42A9. 1    | 3032 | 257. 5383917 |
| Y116A8C. 9  | 3025 | 256. 9438109 |
| C37H5. 8    | 3024 | 256. 8588708 |
| Y37E11AM. 1 | 3018 | 256. 3492302 |
| C39E9. 14   | 3016 | 256. 17935   |
| C07H6. 5    | 3012 | 255. 8395896 |
| F42A6. 7    | 3006 | 255. 329949  |
| T20G5. 1    | 3002 | 254. 9901886 |
| K09H9. 6    | 3000 | 254. 8203084 |
| F38A5. 1    | 2998 | 254. 6504282 |
| F40F9. 6    | 2997 | 254. 5654881 |
| F55C5. 8    | 2997 | 254. 5654881 |
| ZK507. 6    | 2995 | 254. 3956078 |
| F01G4. 1    | 2994 | 254. 3106677 |
| Y56A3A. 11  | 2983 | 253. 3763266 |
| T01H8. 1    | 2982 | 253. 2913865 |
| B0414. 3    | 2981 | 253. 2064464 |
| C40H1. 1    | 2980 | 253. 1215063 |
| K08D12. 1   | 2980 | 253. 1215063 |
| Y39A1B. 3   | 2980 | 253. 1215063 |
| T09F3. 4    | 2978 | 252. 9516261 |
| VW02B12L. 3 | 2978 | 252. 9516261 |
| C14C10. 5   | 2977 | 252. 866686  |
| R06C7. 9    | 2977 | 252. 866686  |
| K07C5. 2    | 2969 | 252. 1871652 |
| F42A9. 2    | 2965 | 251. 8474048 |
| C37H5. 5    | 2959 | 251. 3377641 |
| C08H9. 2    | 2957 | 251. 1678839 |
| C06A5. 6    | 2956 | 251. 0829438 |
| K12D12. 2   | 2956 | 251. 0829438 |
| Y48G1C. 8   | 2955 | 250. 9980037 |
| F59E12. 13  | 2954 | 250. 9130636 |
| Y37E11AL. 8 | 2953 | 250. 8281235 |
| C09D4. 4    | 2946 | 250. 2335428 |
| T05F1. 3    | 2946 | 250. 2335428 |
| ZK632. 13   | 2942 | 249. 8937824 |
| T24A6. 17   | 2941 | 249. 8088423 |
| C53B4. 4    | 2940 | 249. 7239022 |
| D2030. 7    | 2939 | 249. 6389621 |
| Y76B12C. 6  | 2938 | 249. 554022  |
| ZC308. 1    | 2937 | 249. 4690819 |
| C03D6. 5    | 2933 | 249. 1293215 |
| C29H12. 2   | 2928 | 248. 704621  |
| Y119C1B. 8  | 2925 | 248. 4498007 |

|             |      |              |
|-------------|------|--------------|
| F55G1. 4    | 2923 | 248. 2799204 |
| F20G4. 1    | 2920 | 248. 0251001 |
| B0495. 2    | 2915 | 247. 6003996 |
| Y40G12A. 2  | 2913 | 247. 4305194 |
| C32E8. 8    | 2907 | 246. 9208788 |
| H27M09. 3   | 2907 | 246. 9208788 |
| F49E11. 1   | 2903 | 246. 5811184 |
| K01C8. 9    | 2903 | 246. 5811184 |
| F19F10. 11  | 2902 | 246. 4961783 |
| C10F3. 1    | 2899 | 246. 241358  |
| Y39B6A. 37  | 2894 | 245. 8166575 |
| F57C9. 5    | 2893 | 245. 7317174 |
| F21G4. 2    | 2892 | 245. 6467773 |
| F54C9. 8    | 2890 | 245. 4768971 |
| R02D3. 2    | 2890 | 245. 4768971 |
| T23D8. 7    | 2890 | 245. 4768971 |
| B0035. 6    | 2889 | 245. 391957  |
| R05D11. 9   | 2883 | 244. 8823163 |
| M106. 4     | 2882 | 244. 7973762 |
| ZK632. 5    | 2880 | 244. 627496  |
| R01H10. 8   | 2879 | 244. 5425559 |
| F41E6. 4    | 2877 | 244. 3726757 |
| F55A12. 8   | 2877 | 244. 3726757 |
| Y57G11C. 10 | 2876 | 244. 2877356 |
| Y39E4B. 2   | 2873 | 244. 0329153 |
| Y40D12A. 1  | 2865 | 243. 3533945 |
| T09A5. 7    | 2860 | 242. 928694  |
| F57G4. 8    | 2859 | 242. 8437539 |
| W02D3. 8    | 2858 | 242. 7588138 |
| Y18D10A. 13 | 2857 | 242. 6738737 |
| C35B1. 1    | 2853 | 242. 3341133 |
| F52G2. 2    | 2852 | 242. 2491732 |
| M88. 6      | 2847 | 241. 8244726 |
| F35G2. 1    | 2846 | 241. 7395325 |
| M117. 3     | 2845 | 241. 6545924 |
| W02B12. 2   | 2844 | 241. 5696523 |
| Y43F4B. 4   | 2839 | 241. 1449518 |
| C01B10. 8   | 2838 | 241. 0600117 |
| R06A4. 4    | 2836 | 240. 8901315 |
| F29C12. 4   | 2835 | 240. 8051914 |
| Y48G8AL. 1  | 2835 | 240. 8051914 |
| Y106G6H. 7  | 2834 | 240. 7202513 |
| Y43F4B. 3   | 2834 | 240. 7202513 |
| ZK973. 8    | 2834 | 240. 7202513 |
| F59A2. 3    | 2832 | 240. 5503711 |
| Y71G12B. 9  | 2821 | 239. 61603   |
| F44A2. 1    | 2819 | 239. 4461498 |
| C10C6. 1    | 2818 | 239. 3612097 |
| Y110A7A. 19 | 2817 | 239. 2762696 |
| F38B7. 5    | 2815 | 239. 1063893 |
| C53A5. 3    | 2812 | 238. 851569  |
| F35H10. 7   | 2811 | 238. 7666289 |
| Y17G7A. 1   | 2810 | 238. 6816888 |
| C08C3. 2    | 2809 | 238. 5967487 |

|              |      |              |
|--------------|------|--------------|
| C50B8. 1     | 2808 | 238. 5118086 |
| C27B7. 5     | 2806 | 238. 3419284 |
| Y113G7B. 23  | 2806 | 238. 3419284 |
| EEED8. 16    | 2800 | 237. 8322878 |
| F23F12. 6    | 2799 | 237. 7473477 |
| Y71H2B. 11   | 2799 | 237. 7473477 |
| F09F7. 3     | 2783 | 236. 3883061 |
| K02D10. 1    | 2782 | 236. 303366  |
| T10B5. 3     | 2774 | 235. 6238451 |
| C47E12. 5    | 2771 | 235. 3690248 |
| F07F6. 4     | 2767 | 235. 0292644 |
| C02B10. 1    | 2759 | 234. 3497436 |
| C44B9. 4     | 2755 | 234. 0099832 |
| Y18D10A. 1   | 2755 | 234. 0099832 |
| Y61A9LA. 3   | 2750 | 233. 5852827 |
| T20F5. 6     | 2749 | 233. 5003426 |
| Y49E10. 11   | 2749 | 233. 5003426 |
| K10D2. 1     | 2747 | 233. 3304624 |
| F52C12. 4    | 2742 | 232. 9057618 |
| C34B4. 2     | 2740 | 232. 7358816 |
| Y105E8A. 13  | 2739 | 232. 6509415 |
| K03H1. 7     | 2733 | 232. 1413009 |
| ZK1127. 11   | 2732 | 232. 0563608 |
| F26F4. 6     | 2731 | 231. 9714207 |
| Y116F11B. 12 | 2727 | 231. 6316603 |
| Y41D4B. 19   | 2727 | 231. 6316603 |
| T19E10. 1    | 2713 | 230. 4424989 |
| F25G6. 2     | 2711 | 230. 2726187 |
| F52B5. 1     | 2711 | 230. 2726187 |
| R144. 7      | 2711 | 230. 2726187 |
| E01B7. 1     | 2710 | 230. 1876786 |
| C32D5. 8     | 2709 | 230. 1027385 |
| Y67H2A. 5    | 2709 | 230. 1027385 |
| C04F5. 9     | 2706 | 229. 8479181 |
| C42D4. 8     | 2703 | 229. 5930978 |
| F54D11. 2    | 2702 | 229. 5081577 |
| H21P03. 3    | 2701 | 229. 4232176 |
| F36A2. 13    | 2698 | 229. 1683973 |
| F44E7. 4     | 2698 | 229. 1683973 |
| T06D8. 8     | 2698 | 229. 1683973 |
| F53H10. 2    | 2697 | 229. 0834572 |
| F52G2. 1     | 2693 | 228. 7436968 |
| Y39E4B. 1    | 2692 | 228. 6587567 |
| F46F11. 2    | 2689 | 228. 4039364 |
| F57B10. 6    | 2687 | 228. 2340562 |
| B0041. 2     | 2685 | 228. 064176  |
| W04A8. 6     | 2684 | 227. 9792359 |
| K07G5. 2     | 2682 | 227. 8093557 |
| F53H1. 3     | 2680 | 227. 6394755 |
| F11E6. 7     | 2676 | 227. 2997151 |
| F28B3. 9     | 2673 | 227. 0448948 |
| T26A5. 3     | 2671 | 226. 8750145 |
| Y37A1B. 1    | 2671 | 226. 8750145 |
| Y79H2A. 11   | 2665 | 226. 3653739 |

|             |      |              |
|-------------|------|--------------|
| T14G10. 6   | 2663 | 226. 1954937 |
| Y47G6A. 29  | 2661 | 226. 0256135 |
| Y82E9BR. 16 | 2660 | 225. 9406734 |
| M01F1. 8    | 2656 | 225. 600913  |
| F45E12. 1   | 2653 | 225. 3460927 |
| Y116A8C. 26 | 2652 | 225. 2611526 |
| C47D12. 7   | 2649 | 225. 0063323 |
| C10G11. 7   | 2645 | 224. 6665719 |
| C16A3. 8    | 2640 | 224. 2418714 |
| F17C11. 8   | 2640 | 224. 2418714 |
| T05C3. 5    | 2638 | 224. 0719912 |
| C04G6. 4    | 2635 | 223. 8171708 |
| F07A11. 2   | 2635 | 223. 8171708 |
| T09A12. 4   | 2635 | 223. 8171708 |
| C17G10. 4   | 2630 | 223. 3924703 |
| T07A9. 14   | 2628 | 223. 2225901 |
| F09E5. 5    | 2627 | 223. 13765   |
| F20H11. 1   | 2627 | 223. 13765   |
| F53G2. 6    | 2627 | 223. 13765   |
| M106. 1     | 2621 | 222. 6280094 |
| T22D1. 4    | 2617 | 222. 288249  |
| Y47D3A. 29  | 2617 | 222. 288249  |
| Y75B8A. 25  | 2616 | 222. 2033089 |
| W03F8. 3    | 2609 | 221. 6087282 |
| C23G10. 8   | 2607 | 221. 438848  |
| Y47D3A. 16  | 2606 | 221. 3539079 |
| F33H1. 4    | 2604 | 221. 1840277 |
| F20D12. 2   | 2603 | 221. 0990876 |
| K02B12. 3   | 2601 | 220. 9292074 |
| T05H4. 10   | 2597 | 220. 5894469 |
| K04F10. 7   | 2596 | 220. 5045068 |
| ZK688. 8    | 2592 | 220. 1647464 |
| F41H10. 11  | 2591 | 220. 0798063 |
| F25G6. 9    | 2583 | 219. 4002855 |
| Y54E10BR. 4 | 2582 | 219. 3153454 |
| F52E1. 13   | 2581 | 219. 2304053 |
| Y39A1A. 1   | 2581 | 219. 2304053 |
| T04A8. 14   | 2577 | 218. 8906449 |
| B0564. 11   | 2573 | 218. 5508845 |
| F59B2. 2    | 2573 | 218. 5508845 |
| ZK381. 1    | 2573 | 218. 5508845 |
| F59E12. 2   | 2572 | 218. 4659444 |
| Y45F10C. 3  | 2572 | 218. 4659444 |
| R74. 4      | 2571 | 218. 3810043 |
| B0041. 7    | 2568 | 218. 126184  |
| C50E3. 5    | 2566 | 217. 9563038 |
| W02B9. 1    | 2564 | 217. 7864235 |
| Y105E8A. 9  | 2563 | 217. 7014834 |
| F12A10. 8   | 2560 | 217. 4466631 |
| R05D3. 11   | 2554 | 216. 9370225 |
| Y75B7AL. 4  | 2553 | 216. 8520824 |
| M02B7. 5    | 2552 | 216. 7671423 |
| C09G9. 1    | 2550 | 216. 5972621 |
| Y57A10A. 18 | 2549 | 216. 512322  |



|              |      |              |
|--------------|------|--------------|
| Y48G9A. 4    | 2546 | 216. 2575017 |
| Y53F4B. 22   | 2545 | 216. 1725616 |
| C35A5. 8     | 2540 | 215. 7478611 |
| T24F1. 2     | 2540 | 215. 7478611 |
| Y34D9A. 1    | 2538 | 215. 5779809 |
| T24A11. 1    | 2537 | 215. 4930408 |
| C32E8. 11    | 2535 | 215. 3231606 |
| T01G1. 3     | 2535 | 215. 3231606 |
| ZK484. 3     | 2535 | 215. 3231606 |
| F35G12. 5    | 2529 | 214. 81352   |
| F58G11. 2    | 2527 | 214. 6436397 |
| Y67D8A. 2    | 2526 | 214. 5586996 |
| K11H3. 6     | 2524 | 214. 3888194 |
| T25E12. 4    | 2523 | 214. 3038793 |
| C43H8. 2     | 2522 | 214. 2189392 |
| Y61A9LA. 10  | 2522 | 214. 2189392 |
| C53H9. 2     | 2519 | 213. 9641189 |
| D2045. 6     | 2519 | 213. 9641189 |
| F57B9. 2     | 2517 | 213. 7942387 |
| D2013. 5     | 2516 | 213. 7092986 |
| F18C12. 3    | 2514 | 213. 5394184 |
| F58H1. 8     | 2509 | 213. 1147179 |
| K01C8. 5     | 2509 | 213. 1147179 |
| C47G2. 5     | 2508 | 213. 0297778 |
| C27H6. 2     | 2506 | 212. 8598976 |
| Y45G12B. 2   | 2505 | 212. 7749575 |
| Y37H2A. 4    | 2504 | 212. 6900174 |
| F41H10. 6    | 2502 | 212. 5201372 |
| H39E23. 1    | 2502 | 212. 5201372 |
| C09H10. 7    | 2498 | 212. 1803768 |
| F10G7. 9     | 2495 | 211. 9255565 |
| F32A7. 5     | 2493 | 211. 7556762 |
| C46C2. 1     | 2490 | 211. 5008559 |
| R06C7. 1     | 2488 | 211. 3309757 |
| B0379. 3     | 2485 | 211. 0761554 |
| Y48A6B. 13   | 2482 | 210. 8213351 |
| Y57A10A. 31  | 2481 | 210. 736395  |
| E02H9. 3     | 2474 | 210. 1418143 |
| B0238. 9     | 2473 | 210. 0568742 |
| C47E12. 4    | 2471 | 209. 886994  |
| C48G7. 3     | 2470 | 209. 8020539 |
| C25H3. 9     | 2466 | 209. 4622935 |
| Y39G10AR. 14 | 2464 | 209. 2924133 |
| F25H2. 8     | 2461 | 209. 037593  |
| M01E5. 3     | 2460 | 208. 9526529 |
| ZK1098. 10   | 2457 | 208. 6978325 |
| ZK637. 8     | 2452 | 208. 273132  |
| F44E2. 8     | 2451 | 208. 1881919 |
| T21E3. 1     | 2451 | 208. 1881919 |
| ZC410. 2     | 2450 | 208. 1032518 |
| F59H6. 1     | 2445 | 207. 6785513 |
| B0432. 7     | 2443 | 207. 5086711 |
| F37H8. 7     | 2440 | 207. 2538508 |
| Y95B8A. 8    | 2438 | 207. 0839706 |

|             |      |              |
|-------------|------|--------------|
| T06A10. 1   | 2436 | 206. 9140904 |
| C07H4. 2    | 2435 | 206. 8291503 |
| K10G6. 3    | 2433 | 206. 6592701 |
| ZK632. 7    | 2429 | 206. 3195097 |
| F56F3. 1    | 2428 | 206. 2345696 |
| Y47G6A. 6   | 2428 | 206. 2345696 |
| Y54G11A. 8  | 2421 | 205. 6399888 |
| C34E10. 5   | 2418 | 205. 3851685 |
| Y38F2AL. 4  | 2417 | 205. 3002284 |
| C28H8. 3    | 2416 | 205. 2152883 |
| R08D7. 3    | 2414 | 205. 0454081 |
| T19B4. 2    | 2409 | 204. 6207076 |
| B0035. 5    | 2407 | 204. 4508274 |
| Y22D7AL. 10 | 2405 | 204. 2809472 |
| ZK675. 1    | 2404 | 204. 1960071 |
| W01G7. 5    | 2400 | 203. 8562467 |
| Y53C12B. 3  | 2400 | 203. 8562467 |
| W07E6. 2    | 2399 | 203. 7713066 |
| Y43F8C. 12  | 2394 | 203. 3466061 |
| K10D2. 6    | 2390 | 203. 0068457 |
| Y76B12C. 7  | 2390 | 203. 0068457 |
| F54D5. 14   | 2388 | 202. 8369655 |
| B0495. 7    | 2385 | 202. 5821451 |
| T12A2. 2    | 2380 | 202. 1574446 |
| H37A05. 1   | 2378 | 201. 9875644 |
| T23D8. 1    | 2377 | 201. 9026243 |
| ZK353. 1    | 2375 | 201. 7327441 |
| H26D21. 2   | 2374 | 201. 647804  |
| ZK1248. 13  | 2373 | 201. 5628639 |
| ZK742. 1    | 2373 | 201. 5628639 |
| C08B11. 1   | 2369 | 201. 2231035 |
| F43G6. 9    | 2366 | 200. 9682832 |
| T12D8. 6    | 2365 | 200. 8833431 |
| F25B5. 6    | 2363 | 200. 7134629 |
| F48E8. 5    | 2363 | 200. 7134629 |
| C28C12. 10  | 2362 | 200. 6285228 |
| H06001. 1   | 2360 | 200. 4586426 |
| K01G5. 3    | 2354 | 199. 949002  |
| ZC155. 1    | 2352 | 199. 7791218 |
| R06A4. 7    | 2351 | 199. 6941817 |
| F42A10. 4   | 2350 | 199. 6092416 |
| Y111B2A. 11 | 2349 | 199. 5243014 |
| C06G3. 7    | 2347 | 199. 3544212 |
| F52C9. 8    | 2346 | 199. 2694811 |
| ZK673. 3    | 2346 | 199. 2694811 |
| Y50D4C. 5   | 2344 | 199. 0996009 |
| F55A11. 3   | 2340 | 198. 7598405 |
| C25H3. 6    | 2336 | 198. 4200801 |
| D1007. 10   | 2336 | 198. 4200801 |
| C34E10. 3   | 2332 | 198. 0803197 |
| R13H8. 1    | 2330 | 197. 9104395 |
| C18E3. 9    | 2329 | 197. 8254994 |
| Y47G6A. 11  | 2329 | 197. 8254994 |
| Y39G8C. 1   | 2328 | 197. 7405593 |

|             |      |              |
|-------------|------|--------------|
| ZK265. 9    | 2328 | 197. 7405593 |
| B0240. 4    | 2322 | 197. 2309187 |
| K03H1. 2    | 2322 | 197. 2309187 |
| Y79H2A. 3   | 2322 | 197. 2309187 |
| R03D7. 1    | 2317 | 196. 8062182 |
| K08E3. 6    | 2316 | 196. 7212781 |
| F49D11. 9   | 2315 | 196. 636338  |
| F53A3. 3    | 2315 | 196. 636338  |
| ZC376. 5    | 2313 | 196. 4664577 |
| F29G9. 2    | 2311 | 196. 2965775 |
| F31E3. 4    | 2311 | 196. 2965775 |
| ZK520. 4    | 2310 | 196. 2116374 |
| Y71F9AL. 1  | 2308 | 196. 0417572 |
| R12E2. 12   | 2307 | 195. 9568171 |
| F38A5. 2    | 2306 | 195. 871877  |
| Y55F3BR. 2  | 2302 | 195. 5321166 |
| F56D2. 1    | 2301 | 195. 4471765 |
| F22G12. 5   | 2299 | 195. 2772963 |
| Y43B11AR. 4 | 2297 | 195. 1074161 |
| T20F5. 7    | 2294 | 194. 8525958 |
| Y48C3A. 11  | 2293 | 194. 7676557 |
| D1043. 1    | 2290 | 194. 5128354 |
| F57C9. 7    | 2286 | 194. 173075  |
| ZK632. 1    | 2285 | 194. 0881349 |
| Y92H12BL. 1 | 2284 | 194. 0031948 |
| Y106G6A. 5  | 2283 | 193. 9182547 |
| F35G12. 3   | 2282 | 193. 8333146 |
| F36A2. 3    | 2280 | 193. 6634344 |
| B0511. 10   | 2279 | 193. 5784943 |
| ZK1010. 2   | 2277 | 193. 408614  |
| ZK1248. 10  | 2275 | 193. 2387338 |
| C30G12. 7   | 2273 | 193. 0688536 |
| W07E6. 4    | 2272 | 192. 9839135 |
| Y60A3A. 10  | 2272 | 192. 9839135 |
| R119. 4     | 2271 | 192. 8989734 |
| K01D12. 6   | 2268 | 192. 6441531 |
| Y97E10AL. 2 | 2267 | 192. 559213  |
| Y40B1B. 8   | 2266 | 192. 4742729 |
| Y54E2A. 11  | 2265 | 192. 3893328 |
| Y113G7A. 9  | 2263 | 192. 2194526 |
| R09B3. 3    | 2262 | 192. 1345125 |
| C04D8. 1    | 2257 | 191. 709812  |
| W07B3. 2    | 2257 | 191. 709812  |
| T06D8. 6    | 2252 | 191. 2851115 |
| M01G5. 3    | 2251 | 191. 2001714 |
| Y73B6BL. 9  | 2251 | 191. 2001714 |
| R06F6. 8    | 2249 | 191. 0302912 |
| D1044. 6    | 2248 | 190. 9453511 |
| F18H3. 3    | 2247 | 190. 860411  |
| F26F4. 12   | 2246 | 190. 7754709 |
| H34C03. 2   | 2246 | 190. 7754709 |
| C04A2. 7    | 2242 | 190. 4357105 |
| Y24D9A. 2   | 2240 | 190. 2658302 |
| C43E11. 10  | 2239 | 190. 1808901 |

|             |      |              |
|-------------|------|--------------|
| F46C5. 9    | 2236 | 189. 9260698 |
| Y69A2AR. 31 | 2236 | 189. 9260698 |
| Y54E10A. 4  | 2235 | 189. 8411297 |
| Y74C10AR. 1 | 2233 | 189. 6712495 |
| Y55B1BR. 5  | 2232 | 189. 5863094 |
| Y67H2A. 10  | 2231 | 189. 5013693 |
| Y54E2A. 8   | 2228 | 189. 246549  |
| C07D10. 2   | 2227 | 189. 1616089 |
| F23A7. 4    | 2227 | 189. 1616089 |
| F14D2. 13   | 2225 | 188. 9917287 |
| F07C6. 4    | 2224 | 188. 9067886 |
| T10B5. 5    | 2224 | 188. 9067886 |
| F25H8. 1    | 2222 | 188. 7369084 |
| C36B1. 12   | 2221 | 188. 6519683 |
| F57C2. 6    | 2220 | 188. 5670282 |
| R07E5. 3    | 2219 | 188. 4820881 |
| F15B10. 2   | 2217 | 188. 3122079 |
| F22F1. 1    | 2217 | 188. 3122079 |
| Y119C1A. 1  | 2217 | 188. 3122079 |
| Y54E5A. 6   | 2216 | 188. 2272678 |
| F56A8. 3    | 2215 | 188. 1423277 |
| C09H6. 1    | 2214 | 188. 0573876 |
| K08F11. 5   | 2214 | 188. 0573876 |
| F55F8. 3    | 2212 | 187. 8875074 |
| ZK637. 7    | 2211 | 187. 8025673 |
| T26E3. 7    | 2210 | 187. 7176272 |
| R07E5. 7    | 2209 | 187. 6326871 |
| Y67H2A. 8   | 2209 | 187. 6326871 |
| R05D11. 5   | 2207 | 187. 4628069 |
| T20G5. 2    | 2206 | 187. 3778667 |
| Y67D2. 4    | 2206 | 187. 3778667 |
| F28F8. 2    | 2204 | 187. 2079865 |
| Y56A3A. 20  | 2203 | 187. 1230464 |
| F28B3. 8    | 2202 | 187. 0381063 |
| R53. 4      | 2201 | 186. 9531662 |
| F53F8. 5    | 2197 | 186. 6134058 |
| K08B4. 1    | 2197 | 186. 6134058 |
| B0336. 9    | 2194 | 186. 3585855 |
| VW02B12L. 4 | 2194 | 186. 3585855 |
| F08H9. 1    | 2192 | 186. 1887053 |
| Y59C2A. 2   | 2192 | 186. 1887053 |
| K02F3. 4    | 2190 | 186. 0188251 |
| Y73B6BL. 2  | 2190 | 186. 0188251 |
| K02F2. 3    | 2189 | 185. 933885  |
| C47B2. 8    | 2188 | 185. 8489449 |
| F11A10. 4   | 2188 | 185. 8489449 |
| F38H4. 9    | 2186 | 185. 6790647 |
| F57B10. 4   | 2186 | 185. 6790647 |
| R53. 7      | 2185 | 185. 5941246 |
| T03F6. 1    | 2183 | 185. 4242444 |
| H02I12. 5   | 2181 | 185. 2543642 |
| C24A11. 9   | 2173 | 184. 5748434 |
| F44E2. 10   | 2171 | 184. 4049632 |
| F49C12. 12  | 2171 | 184. 4049632 |

|             |      |              |
|-------------|------|--------------|
| F55B12. 3   | 2171 | 184. 4049632 |
| Y54E5B. 2   | 2171 | 184. 4049632 |
| Y116A8C. 16 | 2164 | 183. 8103824 |
| C26E6. 4    | 2163 | 183. 7254423 |
| C27D8. 3    | 2161 | 183. 5555621 |
| F17C11. 9   | 2161 | 183. 5555621 |
| Y51H1A. 4   | 2156 | 183. 1308616 |
| C32D5. 11   | 2155 | 183. 0459215 |
| B0464. 2    | 2153 | 182. 8760413 |
| F44B9. 8    | 2152 | 182. 7911012 |
| R07E5. 2    | 2150 | 182. 621221  |
| Y38A8. 3    | 2148 | 182. 4513408 |
| Y54G2A. 73  | 2148 | 182. 4513408 |
| K07H8. 10   | 2144 | 182. 1115804 |
| ZK856. 16   | 2142 | 181. 9417002 |
| F55A11. 7   | 2141 | 181. 8567601 |
| F59E12. 11  | 2140 | 181. 77182   |
| Y66D12A. 10 | 2140 | 181. 77182   |
| F22D3. 2    | 2139 | 181. 6868799 |
| R148. 3     | 2137 | 181. 5169997 |
| Y49F6B. 1   | 2137 | 181. 5169997 |
| F47G9. 1    | 2134 | 181. 2621793 |
| T10B5. 6    | 2132 | 181. 0922991 |
| T20B12. 8   | 2129 | 180. 8374788 |
| Y76B12C. 2  | 2129 | 180. 8374788 |
| F38A5. 13   | 2128 | 180. 7525387 |
| F55A12. 1   | 2127 | 180. 6675986 |
| Y43F4B. 7   | 2126 | 180. 5826585 |
| Y87G2A. 5   | 2125 | 180. 4977184 |
| C06G4. 2    | 2124 | 180. 4127783 |
| Y63D3A. 5   | 2124 | 180. 4127783 |
| H15N14. 1   | 2122 | 180. 2428981 |
| ZK1098. 2   | 2121 | 180. 157958  |
| Y48G10A. 1  | 2120 | 180. 0730179 |
| F31C3. 3    | 2119 | 179. 9880778 |
| F01F1. 1    | 2114 | 179. 5633773 |
| Y73B6BL. 18 | 2114 | 179. 5633773 |
| T01C3. 7    | 2113 | 179. 4784372 |
| M01A10. 1   | 2109 | 179. 1386768 |
| F53A2. 4    | 2108 | 179. 0537367 |
| M03C11. 5   | 2108 | 179. 0537367 |
| T28D9. 4    | 2106 | 178. 8838565 |
| T26A8. 1    | 2105 | 178. 7989164 |
| Y48A6B. 3   | 2105 | 178. 7989164 |
| C06E1. 9    | 2104 | 178. 7139763 |
| C56C10. 11  | 2104 | 178. 7139763 |
| C15H11. 3   | 2103 | 178. 6290362 |
| D2013. 8    | 2103 | 178. 6290362 |
| T05C12. 7   | 2100 | 178. 3742159 |
| C25G4. 5    | 2099 | 178. 2892758 |
| Y6B3A. 1    | 2098 | 178. 2043356 |
| T13F2. 6    | 2097 | 178. 1193955 |
| D1022. 7    | 2095 | 177. 9495153 |
| F46F11. 4   | 2092 | 177. 694695  |

|              |      |              |
|--------------|------|--------------|
| F40F8. 9     | 2089 | 177. 4398747 |
| C30F8. 2     | 2087 | 177. 2699945 |
| Y32G9A. 8    | 2087 | 177. 2699945 |
| B0336. 5     | 2085 | 177. 1001143 |
| F18C12. 2    | 2082 | 176. 845294  |
| T11F9. 10    | 2082 | 176. 845294  |
| F57B1. 2     | 2080 | 176. 6754138 |
| Y17G7B. 13   | 2080 | 176. 6754138 |
| Y37E3. 9     | 2080 | 176. 6754138 |
| ZC434. 8     | 2080 | 176. 6754138 |
| F39B2. 4     | 2078 | 176. 5055336 |
| R10D12. 13   | 2076 | 176. 3356534 |
| F32A5. 1     | 2074 | 176. 1657732 |
| F44B9. 6     | 2073 | 176. 0808331 |
| Y47A7. 1     | 2073 | 176. 0808331 |
| T16G12. 4    | 2071 | 175. 9109529 |
| Y48C3A. 8    | 2068 | 175. 6561326 |
| T06E8. 1     | 2066 | 175. 4862524 |
| T12E12. 4    | 2066 | 175. 4862524 |
| Y38F2AR. 12  | 2066 | 175. 4862524 |
| C48B4. 9     | 2065 | 175. 4013123 |
| Y113G7A. 8   | 2065 | 175. 4013123 |
| Y39G10AR. 12 | 2065 | 175. 4013123 |
| F33E11. 1    | 2064 | 175. 3163722 |
| C29E4. 3     | 2063 | 175. 2314321 |
| Y53F4B. 5    | 2062 | 175. 1464919 |
| C16A11. 10   | 2061 | 175. 0615518 |
| D2085. 6     | 2061 | 175. 0615518 |
| Y111B2A. 4   | 2061 | 175. 0615518 |
| Y39A3CL. 7   | 2056 | 174. 6368513 |
| F57C9. 2     | 2055 | 174. 5519112 |
| F58F6. 4     | 2055 | 174. 5519112 |
| M01E5. 4     | 2053 | 174. 382031  |
| Y80D4G. 1    | 2053 | 174. 382031  |
| T12G3. 7     | 2051 | 174. 2121508 |
| C06G4. 1     | 2050 | 174. 1272107 |
| F43G6. 1     | 2048 | 173. 9573305 |
| T24D1. 3     | 2046 | 173. 7874503 |
| F55G1. 6     | 2044 | 173. 6175701 |
| T19A5. 1     | 2043 | 173. 53263   |
| F46F11. 8    | 2040 | 173. 2778097 |
| B0464. 1     | 2039 | 173. 1928696 |
| W08D2. 5     | 2038 | 173. 1079295 |
| Y75B8A. 24   | 2038 | 173. 1079295 |
| H14A12. 2    | 2036 | 172. 9380493 |
| W09G3. 6     | 2032 | 172. 5982889 |
| K08D12. 2    | 2031 | 172. 5133488 |
| T14B4. 1     | 2031 | 172. 5133488 |
| Y56A3A. 33   | 2031 | 172. 5133488 |
| C01B10. 9    | 2029 | 172. 3434686 |
| C46A5. 5     | 2029 | 172. 3434686 |
| Y54F10AM. 11 | 2029 | 172. 3434686 |
| Y57A10A. 27  | 2028 | 172. 2585285 |
| Y38C1AA. 3   | 2026 | 172. 0886482 |

|             |      |              |
|-------------|------|--------------|
| C56E6. 3    | 2025 | 172. 0037081 |
| M4. 1       | 2025 | 172. 0037081 |
| C17E4. 5    | 2022 | 171. 7488878 |
| R05H5. 3    | 2022 | 171. 7488878 |
| Y71F9AL. 17 | 2022 | 171. 7488878 |
| ZK637. 9    | 2022 | 171. 7488878 |
| M03C11. 4   | 2021 | 171. 6639477 |
| C26C6. 1    | 2018 | 171. 4091274 |
| Y69A2AR. 28 | 2017 | 171. 3241873 |
| C24H12. 5   | 2016 | 171. 2392472 |
| C10C6. 6    | 2015 | 171. 1543071 |
| C50F4. 11   | 2015 | 171. 1543071 |
| R11E3. 8    | 2015 | 171. 1543071 |
| R107. 5     | 2013 | 170. 9844269 |
| C18F3. 2    | 2012 | 170. 8994868 |
| K07A1. 2    | 2011 | 170. 8145467 |
| B0001. 8    | 2010 | 170. 7296066 |
| F09C8. 2    | 2008 | 170. 5597264 |
| F49D11. 10  | 2007 | 170. 4747863 |
| K11D9. 2    | 2007 | 170. 4747863 |
| Y37E3. 17   | 2004 | 170. 219966  |
| Y39G10AR. 8 | 2001 | 169. 9651457 |
| F08F3. 2    | 1999 | 169. 7952655 |
| T28A8. 3    | 1999 | 169. 7952655 |
| F33H2. 2    | 1995 | 169. 4555051 |
| C06E7. 1    | 1994 | 169. 370565  |
| Y102E9. 1   | 1994 | 169. 370565  |
| D2092. 2    | 1991 | 169. 1157447 |
| Y38F2AR. 5  | 1989 | 168. 9458644 |
| W01A11. 2   | 1988 | 168. 8609243 |
| F55G1. 3    | 1987 | 168. 7759842 |
| C14C11. 2   | 1986 | 168. 6910441 |
| T22H9. 2    | 1983 | 168. 4362238 |
| T22D1. 5    | 1980 | 168. 1814035 |
| F10D11. 2   | 1979 | 168. 0964634 |
| T01G1. 1    | 1977 | 167. 9265832 |
| Y67H2A. 6   | 1974 | 167. 6717629 |
| C29H12. 5   | 1973 | 167. 5868228 |
| ZC376. 6    | 1968 | 167. 1621223 |
| ZC518. 2    | 1968 | 167. 1621223 |
| H20J04. 8   | 1967 | 167. 0771822 |
| K08F9. 4    | 1964 | 166. 8223619 |
| Y66D12A. 23 | 1964 | 166. 8223619 |
| C50F2. 2    | 1963 | 166. 7374218 |
| C16A11. 3   | 1961 | 166. 5675416 |
| F59B8. 2    | 1959 | 166. 3976614 |
| F41H10. 3   | 1958 | 166. 3127213 |
| Y48A6B. 6   | 1956 | 166. 1428411 |
| F53E4. 1    | 1955 | 166. 057901  |
| F13H10. 4   | 1952 | 165. 8030806 |
| R05D11. 4   | 1952 | 165. 8030806 |
| T01C3. 1    | 1951 | 165. 7181405 |
| B0250. 2    | 1949 | 165. 5482603 |
| F43E2. 4    | 1949 | 165. 5482603 |

|             |      |              |
|-------------|------|--------------|
| C39E9. 12   | 1948 | 165. 4633202 |
| F01F1. 4    | 1948 | 165. 4633202 |
| C06A5. 3    | 1947 | 165. 3783801 |
| C01A2. 3    | 1946 | 165. 29344   |
| F55A12. 5   | 1944 | 165. 1235598 |
| T09E8. 3    | 1944 | 165. 1235598 |
| F22D3. 1    | 1943 | 165. 0386197 |
| F37D6. 1    | 1943 | 165. 0386197 |
| Y38C1AA. 12 | 1943 | 165. 0386197 |
| F10C2. 4    | 1942 | 164. 9536796 |
| F59A6. 6    | 1942 | 164. 9536796 |
| C18D11. 2   | 1941 | 164. 8687395 |
| C34B2. 6    | 1941 | 164. 8687395 |
| F56D1. 1    | 1941 | 164. 8687395 |
| F35D6. 1    | 1938 | 164. 6139192 |
| F55A11. 4   | 1936 | 164. 444039  |
| C08B11. 3   | 1934 | 164. 2741588 |
| W02B12. 6   | 1931 | 164. 0193385 |
| D1007. 7    | 1930 | 163. 9343984 |
| ZK662. 4    | 1930 | 163. 9343984 |
| C54G4. 7    | 1929 | 163. 8494583 |
| F39C12. 1   | 1928 | 163. 7645182 |
| B0261. 7    | 1922 | 163. 2548776 |
| C12D8. 1    | 1921 | 163. 1699375 |
| F20H11. 3   | 1921 | 163. 1699375 |
| F57B9. 10   | 1919 | 163. 0000572 |
| Y48G8AL. 6  | 1919 | 163. 0000572 |
| D2085. 3    | 1916 | 162. 7452369 |
| Y105E8B. 2  | 1916 | 162. 7452369 |
| Y47G6A. 2   | 1915 | 162. 6602968 |
| Y62F5A. 1   | 1915 | 162. 6602968 |
| C34E10. 6   | 1914 | 162. 5753567 |
| F37E3. 1    | 1914 | 162. 5753567 |
| F56A3. 2    | 1912 | 162. 4054765 |
| K04G7. 4    | 1911 | 162. 3205364 |
| C04G2. 6    | 1909 | 162. 1506562 |
| DY3. 7      | 1909 | 162. 1506562 |
| Y75B12B. 1  | 1908 | 162. 0657161 |
| B0416. 6    | 1906 | 161. 8958359 |
| F55C5. 7    | 1906 | 161. 8958359 |
| C49H3. 10   | 1905 | 161. 8108958 |
| Y110A7A. 6  | 1903 | 161. 6410156 |
| C48D1. 2    | 1902 | 161. 5560755 |
| K04G2. 6    | 1902 | 161. 5560755 |
| W03F11. 6   | 1902 | 161. 5560755 |
| F18E2. 3    | 1898 | 161. 2163151 |
| K08E3. 7    | 1897 | 161. 131375  |
| T02H6. 2    | 1897 | 161. 131375  |
| Y54E5A. 7   | 1897 | 161. 131375  |
| T23G7. 3    | 1895 | 160. 9614948 |
| Y54E2A. 3   | 1895 | 160. 9614948 |
| T08G11. 1   | 1894 | 160. 8765547 |
| C42C1. 4    | 1892 | 160. 7066745 |
| F40C5. 2    | 1891 | 160. 6217344 |



|             |      |              |
|-------------|------|--------------|
| K05C4. 4    | 1889 | 160. 4518542 |
| Y48A6A. 1   | 1887 | 160. 281974  |
| W02G9. 1    | 1886 | 160. 1970339 |
| Y37D8A. 1   | 1886 | 160. 1970339 |
| ZC395. 3    | 1886 | 160. 1970339 |
| F42A6. 6    | 1885 | 160. 1120938 |
| T24C4. 6    | 1885 | 160. 1120938 |
| T21B10. 7   | 1884 | 160. 0271537 |
| Y106G6H. 12 | 1884 | 160. 0271537 |
| F17C11. 10  | 1882 | 159. 8572734 |
| C14B1. 1    | 1881 | 159. 7723333 |
| Y54E10A. 9  | 1880 | 159. 6873932 |
| F58E10. 1   | 1879 | 159. 6024531 |
| T05E8. 3    | 1879 | 159. 6024531 |
| Y42H9AR. 1  | 1878 | 159. 517513  |
| C07G1. 3    | 1877 | 159. 4325729 |
| ZK593. 4    | 1877 | 159. 4325729 |
| Y111B2A. 24 | 1875 | 159. 2626927 |
| W09G3. 2    | 1873 | 159. 0928125 |
| F53A2. 8    | 1871 | 158. 9229323 |
| C30G12. 6   | 1870 | 158. 8379922 |
| F44E2. 2    | 1870 | 158. 8379922 |
| K02C4. 3    | 1870 | 158. 8379922 |
| R08D7. 6    | 1870 | 158. 8379922 |
| T04H1. 4    | 1870 | 158. 8379922 |
| Y56A3A. 17  | 1870 | 158. 8379922 |
| F29D10. 4   | 1868 | 158. 668112  |
| F30H5. 1    | 1868 | 158. 668112  |
| Y119D3B. 11 | 1868 | 158. 668112  |
| C05C8. 9    | 1865 | 158. 4132917 |
| F23C8. 4    | 1865 | 158. 4132917 |
| Y59A8B. 6   | 1862 | 158. 1584714 |
| T07C4. 3    | 1860 | 157. 9885912 |
| T08A11. 1   | 1860 | 157. 9885912 |
| R53. 1      | 1856 | 157. 6488308 |
| Y54G9A. 5   | 1855 | 157. 5638907 |
| Y75B12B. 2  | 1854 | 157. 4789506 |
| T07A9. 13   | 1851 | 157. 2241303 |
| C24H11. 7   | 1848 | 156. 96931   |
| K05C4. 1    | 1848 | 156. 96931   |
| C52E4. 2    | 1846 | 156. 7994297 |
| F39H11. 2   | 1846 | 156. 7994297 |
| M117. 2     | 1845 | 156. 7144896 |
| H19N07. 2   | 1844 | 156. 6295495 |
| Y53G8AM. 8  | 1844 | 156. 6295495 |
| F21A3. 6    | 1841 | 156. 3747292 |
| F30F8. 1    | 1836 | 155. 9500287 |
| T04H1. 2    | 1836 | 155. 9500287 |
| Y54G2A. 26  | 1832 | 155. 6102683 |
| Y24F12A. 2  | 1830 | 155. 4403881 |
| H12C20. 2   | 1829 | 155. 355448  |
| T08B2. 5    | 1828 | 155. 2705079 |
| F13D12. 7   | 1826 | 155. 1006277 |
| F56C9. 10   | 1825 | 155. 0156876 |

|             |      |              |
|-------------|------|--------------|
| R31. 2      | 1824 | 154. 9307475 |
| F28C6. 6    | 1823 | 154. 8458074 |
| F54D5. 8    | 1823 | 154. 8458074 |
| F54C8. 3    | 1822 | 154. 7608673 |
| Y45F10A. 2  | 1822 | 154. 7608673 |
| F10G7. 2    | 1817 | 154. 3361668 |
| T05G5. 1    | 1814 | 154. 0813465 |
| T23B5. 1    | 1814 | 154. 0813465 |
| Y51H1A. 2   | 1814 | 154. 0813465 |
| F32A7. 4    | 1813 | 153. 9964064 |
| C36B1. 4    | 1810 | 153. 741586  |
| M01A10. 2   | 1810 | 153. 741586  |
| T25B9. 8    | 1807 | 153. 4867657 |
| R144. 4     | 1804 | 153. 2319454 |
| T09F3. 3    | 1803 | 153. 1470053 |
| W03F8. 4    | 1802 | 153. 0620652 |
| B0035. 12   | 1801 | 152. 9771251 |
| H24K24. 4   | 1801 | 152. 9771251 |
| K07F5. 13   | 1801 | 152. 9771251 |
| Y34D9A. 7   | 1801 | 152. 9771251 |
| T11G6. 8    | 1800 | 152. 892185  |
| T23H2. 3    | 1798 | 152. 7223048 |
| Y37D8A. 9   | 1797 | 152. 6373647 |
| Y38C1AA. 1  | 1796 | 152. 5524246 |
| Y54E1OBL. 6 | 1796 | 152. 5524246 |
| C13B9. 4    | 1795 | 152. 4674845 |
| F10B5. 7    | 1793 | 152. 2976043 |
| ZK792. 5    | 1793 | 152. 2976043 |
| H25P06. 2   | 1792 | 152. 2126642 |
| C18E3. 2    | 1791 | 152. 1277241 |
| C46F11. 2   | 1791 | 152. 1277241 |
| T07A9. 6    | 1791 | 152. 1277241 |
| ZC404. 9    | 1791 | 152. 1277241 |
| ZK652. 6    | 1791 | 152. 1277241 |
| R10H10. 7   | 1790 | 152. 042784  |
| C52E2. 6    | 1789 | 151. 9578439 |
| Y54H5A. 4   | 1788 | 151. 8729038 |
| C48B4. 10   | 1785 | 151. 6180835 |
| Y102A5C. 1  | 1785 | 151. 6180835 |
| Y105E8A. 21 | 1784 | 151. 5331434 |
| C27H6. 8    | 1783 | 151. 4482033 |
| F52F12. 4   | 1783 | 151. 4482033 |
| C01G8. 6    | 1782 | 151. 3632632 |
| C32D5. 5    | 1782 | 151. 3632632 |
| H14A12. 3   | 1777 | 150. 9385627 |
| W09H1. 3    | 1777 | 150. 9385627 |
| Y73B3A. 11  | 1777 | 150. 9385627 |
| Y23H5A. 3   | 1776 | 150. 8536226 |
| F33A8. 3    | 1775 | 150. 7686824 |
| F55A12. 3   | 1775 | 150. 7686824 |
| Y54G11A. 11 | 1774 | 150. 6837423 |
| C08B6. 7    | 1773 | 150. 5988022 |
| C14B1. 4    | 1773 | 150. 5988022 |
| ZK616. 5    | 1773 | 150. 5988022 |

|             |      |              |
|-------------|------|--------------|
| C50A2. 2    | 1772 | 150. 5138621 |
| T10F2. 1    | 1772 | 150. 5138621 |
| T02H6. 1    | 1771 | 150. 428922  |
| Y37E11AL. 7 | 1766 | 150. 0042215 |
| ZK512. 5    | 1766 | 150. 0042215 |
| F25B4. 5    | 1765 | 149. 9192814 |
| T28A8. 5    | 1765 | 149. 9192814 |
| T19E7. 2    | 1764 | 149. 8343413 |
| B0273. 2    | 1762 | 149. 6644611 |
| Y32B12B. 4  | 1762 | 149. 6644611 |
| Y54G2A. 31  | 1759 | 149. 4096408 |
| C18H9. 3    | 1758 | 149. 3247007 |
| F22B7. 6    | 1757 | 149. 2397606 |
| C49H3. 9    | 1756 | 149. 1548205 |
| M01A10. 3   | 1756 | 149. 1548205 |
| R02F2. 7    | 1756 | 149. 1548205 |
| W03G9. 2    | 1754 | 148. 9849403 |
| T22A3. 3    | 1753 | 148. 9000002 |
| F56D1. 4    | 1750 | 148. 6451799 |
| F28C6. 4    | 1748 | 148. 4752997 |
| F32B6. 2    | 1748 | 148. 4752997 |
| Y76A2B. 3   | 1748 | 148. 4752997 |
| R17. 2      | 1747 | 148. 3903596 |
| C06G3. 9    | 1746 | 148. 3054195 |
| C55B7. 9    | 1744 | 148. 1355393 |
| K02F3. 2    | 1743 | 148. 0505992 |
| T09B4. 2    | 1743 | 148. 0505992 |
| Y73F8A. 25  | 1743 | 148. 0505992 |
| R07G3. 3    | 1741 | 147. 880719  |
| Y47G6A. 20  | 1741 | 147. 880719  |
| R11D1. 8    | 1740 | 147. 7957789 |
| Y41D4B. 12  | 1740 | 147. 7957789 |
| ZK863. 4    | 1740 | 147. 7957789 |
| Y65B4BL. 4  | 1739 | 147. 7108387 |
| ZK1307. 6   | 1739 | 147. 7108387 |
| C35D10. 1   | 1737 | 147. 5409585 |
| E03A3. 2    | 1737 | 147. 5409585 |
| Y106G6H. 5  | 1737 | 147. 5409585 |
| B0261. 2    | 1736 | 147. 4560184 |
| R02F11. 4   | 1736 | 147. 4560184 |
| T07C4. 7    | 1734 | 147. 2861382 |
| H38K22. 1   | 1733 | 147. 2011981 |
| Y17G9B. 9   | 1733 | 147. 2011981 |
| Y67D8B. 4   | 1732 | 147. 116258  |
| H06I04. 1   | 1730 | 146. 9463778 |
| C06E1. 10   | 1728 | 146. 7764976 |
| F54C4. 3    | 1728 | 146. 7764976 |
| R06C1. 4    | 1727 | 146. 6915575 |
| F52C12. 1   | 1725 | 146. 5216773 |
| F35F11. 1   | 1722 | 146. 266857  |
| Y62E10A. 2  | 1722 | 146. 266857  |
| F26E4. 1    | 1721 | 146. 1819169 |
| R06C7. 5    | 1721 | 146. 1819169 |
| Y111B2A. 22 | 1720 | 146. 0969768 |

|             |      |              |
|-------------|------|--------------|
| ZC434. 5    | 1719 | 146. 0120367 |
| AH6. 5      | 1717 | 145. 8421565 |
| F44C4. 4    | 1717 | 145. 8421565 |
| C18D11. 1   | 1716 | 145. 7572164 |
| R119. 7     | 1716 | 145. 7572164 |
| F23F1. 8    | 1714 | 145. 5873362 |
| F25B3. 1    | 1714 | 145. 5873362 |
| Y56A3A. 2   | 1713 | 145. 5023961 |
| Y48B6A. 1   | 1712 | 145. 417456  |
| ZK686. 3    | 1712 | 145. 417456  |
| F42H11. 2   | 1708 | 145. 0776956 |
| F59H5. 1    | 1708 | 145. 0776956 |
| K04F10. 4   | 1707 | 144. 9927555 |
| F59A7. 7    | 1704 | 144. 7379352 |
| D2030. 5    | 1703 | 144. 652995  |
| Y37D8A. 22  | 1703 | 144. 652995  |
| R06F6. 5    | 1700 | 144. 3981747 |
| Y52D3. 1    | 1700 | 144. 3981747 |
| ZC302. 2    | 1700 | 144. 3981747 |
| C29A12. 1   | 1699 | 144. 3132346 |
| ZC247. 1    | 1699 | 144. 3132346 |
| D2063. 3    | 1695 | 143. 9734742 |
| T22C1. 1    | 1693 | 143. 803594  |
| C01G5. 6    | 1692 | 143. 7186539 |
| F31D4. 3    | 1692 | 143. 7186539 |
| F48A11. 4   | 1691 | 143. 6337138 |
| M01F1. 4    | 1691 | 143. 6337138 |
| C01C7. 1    | 1690 | 143. 5487737 |
| C44B11. 6   | 1690 | 143. 5487737 |
| F09G2. 9    | 1688 | 143. 3788935 |
| Y48G8AL. 5  | 1687 | 143. 2939534 |
| Y54E5A. 4   | 1687 | 143. 2939534 |
| Y39A1A. 13  | 1685 | 143. 1240732 |
| F28C6. 8    | 1681 | 142. 7843128 |
| Y32H12A. 5  | 1679 | 142. 6144326 |
| Y45G5AM. 8  | 1678 | 142. 5294925 |
| R07G3. 7    | 1676 | 142. 3596123 |
| F14D2. 2    | 1675 | 142. 2746722 |
| B0285. 3    | 1674 | 142. 1897321 |
| F53A2. 5    | 1674 | 142. 1897321 |
| C36B1. 8    | 1673 | 142. 104792  |
| Y71F9AL. 18 | 1673 | 142. 104792  |
| F33H2. 1    | 1671 | 141. 9349118 |
| T21C9. 2    | 1671 | 141. 9349118 |
| F54D10. 3   | 1668 | 141. 6800914 |
| Y50D7A. 6   | 1668 | 141. 6800914 |
| Y55B1AL. 3  | 1667 | 141. 5951513 |
| F39H11. 1   | 1666 | 141. 5102112 |
| H05L14. 2   | 1666 | 141. 5102112 |
| C07F11. 1   | 1665 | 141. 4252711 |
| C25A1. 5    | 1663 | 141. 2553909 |
| C46C2. 3    | 1662 | 141. 1704508 |
| Y50D4C. 1   | 1661 | 141. 0855107 |
| M88. 5      | 1657 | 140. 7457503 |

|            |      |              |
|------------|------|--------------|
| T02G5. 12  | 1656 | 140. 6608102 |
| ZK616. 4   | 1655 | 140. 5758701 |
| K01C8. 10  | 1654 | 140. 49093   |
| T01A4. 1   | 1654 | 140. 49093   |
| K08H10. 1  | 1653 | 140. 4059899 |
| H27A22. 1  | 1652 | 140. 3210498 |
| C13B9. 3   | 1651 | 140. 2361097 |
| R05H10. 2  | 1651 | 140. 2361097 |
| T23G7. 1   | 1651 | 140. 2361097 |
| F58B3. 7   | 1650 | 140. 1511696 |
| K11H3. 2   | 1650 | 140. 1511696 |
| T25D3. 4   | 1650 | 140. 1511696 |
| Y42H9B. 3  | 1650 | 140. 1511696 |
| C05C10. 2  | 1649 | 140. 0662295 |
| T01B7. 5   | 1649 | 140. 0662295 |
| Y45F10D. 7 | 1649 | 140. 0662295 |
| C56E6. 9   | 1648 | 139. 9812894 |
| R06A4. 9   | 1648 | 139. 9812894 |
| C49H3. 5   | 1647 | 139. 8963493 |
| F56A3. 1   | 1647 | 139. 8963493 |
| C50C3. 1   | 1642 | 139. 4716488 |
| B0511. 12  | 1640 | 139. 3017686 |
| B0024. 11  | 1639 | 139. 2168285 |
| C27A12. 10 | 1636 | 138. 9620082 |
| C48B6. 6   | 1635 | 138. 8770681 |
| F57B10. 3  | 1635 | 138. 8770681 |
| F33D11. 9  | 1634 | 138. 792128  |
| T10F2. 3   | 1634 | 138. 792128  |
| T26A5. 6   | 1634 | 138. 792128  |
| F45F2. 11  | 1633 | 138. 7071879 |
| Y71A12B. 4 | 1632 | 138. 6222477 |
| C26D10. 2  | 1629 | 138. 3674274 |
| T20D3. 3   | 1629 | 138. 3674274 |
| W03G9. 4   | 1629 | 138. 3674274 |
| F27C1. 7   | 1628 | 138. 2824873 |
| F27D4. 4   | 1627 | 138. 1975472 |
| Y48G9A. 6  | 1627 | 138. 1975472 |
| F28B3. 7   | 1626 | 138. 1126071 |
| Y55B1BR. 4 | 1626 | 138. 1126071 |
| F26F4. 7   | 1625 | 138. 027667  |
| K06A5. 4   | 1624 | 137. 9427269 |
| Y71D11A. 1 | 1624 | 137. 9427269 |
| Y53C12A. 1 | 1623 | 137. 8577868 |
| Y59C2A. 3  | 1621 | 137. 6879066 |
| B0336. 7   | 1619 | 137. 5180264 |
| M01F1. 9   | 1619 | 137. 5180264 |
| Y66H1A. 3  | 1619 | 137. 5180264 |
| B0024. 9   | 1618 | 137. 4330863 |
| R07B5. 9   | 1618 | 137. 4330863 |
| C41D11. 8  | 1617 | 137. 3481462 |
| F14D2. 4   | 1617 | 137. 3481462 |
| T09E8. 2   | 1616 | 137. 2632061 |
| F01F1. 5   | 1615 | 137. 178266  |
| F36F2. 6   | 1615 | 137. 178266  |

|             |      |              |
|-------------|------|--------------|
| M106. 2     | 1610 | 136. 7535655 |
| T03D3. 5    | 1609 | 136. 6686254 |
| C14A4. 4    | 1608 | 136. 5836853 |
| T20G5. 14   | 1608 | 136. 5836853 |
| F18A11. 1   | 1607 | 136. 4987452 |
| F42A10. 5   | 1607 | 136. 4987452 |
| T13H5. 8    | 1607 | 136. 4987452 |
| K01G5. 5    | 1606 | 136. 4138051 |
| C44B9. 5    | 1605 | 136. 328865  |
| F45F2. 10   | 1605 | 136. 328865  |
| C55B7. 1    | 1604 | 136. 2439249 |
| T15B7. 2    | 1603 | 136. 1589848 |
| K08E3. 8    | 1602 | 136. 0740447 |
| Y39B6A. 36  | 1602 | 136. 0740447 |
| ZC302. 1    | 1602 | 136. 0740447 |
| B0523. 5    | 1600 | 135. 9041645 |
| Y73F8A. 27  | 1599 | 135. 8192244 |
| C25A1. 10   | 1598 | 135. 7342843 |
| F32D1. 9    | 1597 | 135. 6493442 |
| T12F5. 5    | 1596 | 135. 564404  |
| Y116A8C. 36 | 1595 | 135. 4794639 |
| R05F9. 1    | 1593 | 135. 3095837 |
| ZK370. 4    | 1593 | 135. 3095837 |
| F37C12. 9   | 1590 | 135. 0547634 |
| F54D5. 7    | 1590 | 135. 0547634 |
| T01H3. 2    | 1590 | 135. 0547634 |
| Y59A8B. 1   | 1589 | 134. 9698233 |
| F23H11. 4   | 1588 | 134. 8848832 |
| ZK402. 5    | 1588 | 134. 8848832 |
| D2005. 5    | 1587 | 134. 7999431 |
| T01G9. 5    | 1587 | 134. 7999431 |
| EEED8. 14   | 1586 | 134. 715003  |
| C06H2. 3    | 1585 | 134. 6300629 |
| C49C3. 6    | 1585 | 134. 6300629 |
| ZC404. 3    | 1585 | 134. 6300629 |
| W07E6. 1    | 1584 | 134. 5451228 |
| Y37A1B. 2   | 1584 | 134. 5451228 |
| Y37B11A. 3  | 1584 | 134. 5451228 |
| T22B11. 5   | 1583 | 134. 4601827 |
| C14A4. 10   | 1582 | 134. 3752426 |
| W02D3. 10   | 1582 | 134. 3752426 |
| M110. 5     | 1580 | 134. 2053624 |
| T20H4. 4    | 1580 | 134. 2053624 |
| Y37D8A. 6   | 1580 | 134. 2053624 |
| R01H2. 3    | 1577 | 133. 9505421 |
| Y18D10A. 19 | 1577 | 133. 9505421 |
| Y41E3. 10   | 1577 | 133. 9505421 |
| Y75B8A. 7   | 1575 | 133. 7806619 |
| F55A3. 2    | 1574 | 133. 6957218 |
| K01G5. 9    | 1572 | 133. 5258416 |
| D2085. 5    | 1571 | 133. 4409015 |
| T07F8. 3    | 1571 | 133. 4409015 |
| C08F8. 3    | 1570 | 133. 3559614 |
| D1022. 1    | 1569 | 133. 2710213 |

|             |      |              |
|-------------|------|--------------|
| T21B10. 3   | 1569 | 133. 2710213 |
| T03F1. 1    | 1568 | 133. 1860812 |
| F54A3. 2    | 1567 | 133. 1011411 |
| F54D11. 4   | 1567 | 133. 1011411 |
| F31E3. 5    | 1566 | 133. 016201  |
| K02B2. 1    | 1566 | 133. 016201  |
| R09B3. 2    | 1566 | 133. 016201  |
| Y111B2A. 20 | 1566 | 133. 016201  |
| Y23H5B. 7   | 1566 | 133. 016201  |
| Y42G9A. 4   | 1566 | 133. 016201  |
| Y54E10A. 15 | 1565 | 132. 9312609 |
| Y32B12B. 2  | 1564 | 132. 8463208 |
| F41E6. 13   | 1563 | 132. 7613807 |
| R06A4. 2    | 1563 | 132. 7613807 |
| W03F9. 1    | 1563 | 132. 7613807 |
| ZK757. 4    | 1562 | 132. 6764406 |
| F01F1. 9    | 1561 | 132. 5915005 |
| Y57G11C. 9  | 1561 | 132. 5915005 |
| F40B1. 1    | 1556 | 132. 1667999 |
| F37C12. 13  | 1555 | 132. 0818598 |
| R13A5. 12   | 1555 | 132. 0818598 |
| W09B6. 3    | 1554 | 131. 9969197 |
| Y67D8C. 10  | 1554 | 131. 9969197 |
| Y53F4B. 3   | 1553 | 131. 9119796 |
| F52C9. 3    | 1552 | 131. 8270395 |
| B0303. 2    | 1551 | 131. 7420994 |
| K09H11. 11  | 1551 | 131. 7420994 |
| T01H3. 4    | 1549 | 131. 5722192 |
| B0025. 1    | 1548 | 131. 4872791 |
| C05D11. 2   | 1548 | 131. 4872791 |
| F22B5. 9    | 1548 | 131. 4872791 |
| F52H3. 4    | 1548 | 131. 4872791 |
| F42G8. 10   | 1546 | 131. 3173989 |
| W02G9. 3    | 1544 | 131. 1475187 |
| W08D2. 7    | 1544 | 131. 1475187 |
| C41C4. 8    | 1543 | 131. 0625786 |
| C44E4. 4    | 1541 | 130. 8926984 |
| ZK180. 3    | 1539 | 130. 7228182 |
| C38C3. 5    | 1535 | 130. 3830578 |
| T27E9. 3    | 1535 | 130. 3830578 |
| W02A2. 6    | 1535 | 130. 3830578 |
| ZK675. 2    | 1535 | 130. 3830578 |
| B0564. 7    | 1533 | 130. 2131776 |
| K04G2. 8    | 1533 | 130. 2131776 |
| Y67D2. 2    | 1533 | 130. 2131776 |
| C26C6. 2    | 1532 | 130. 1282375 |
| T01C3. 9    | 1531 | 130. 0432974 |
| Y47H9C. 8   | 1531 | 130. 0432974 |
| C04A2. 3    | 1530 | 129. 9583573 |
| Y47G6A. 23  | 1527 | 129. 703537  |
| F22D6. 3    | 1526 | 129. 6185969 |
| M01F1. 2    | 1526 | 129. 6185969 |
| R102. 5     | 1526 | 129. 6185969 |
| Y48B6A. 13  | 1525 | 129. 5336568 |

|             |      |              |
|-------------|------|--------------|
| Y48B6A. 11  | 1522 | 129. 2788364 |
| Y54E2A. 2   | 1522 | 129. 2788364 |
| F54E7. 7    | 1521 | 129. 1938963 |
| Y111B2A. 14 | 1521 | 129. 1938963 |
| ZK809. 4    | 1521 | 129. 1938963 |
| T22C1. 3    | 1520 | 129. 1089562 |
| E01A2. 6    | 1518 | 128. 939076  |
| F55A11. 2   | 1518 | 128. 939076  |
| T23G4. 3    | 1518 | 128. 939076  |
| Y82E9BR. 2  | 1518 | 128. 939076  |
| C07E3. 1    | 1516 | 128. 7691958 |
| F46B6. 5    | 1516 | 128. 7691958 |
| T19B10. 8   | 1514 | 128. 5993156 |
| Y69H2. 6    | 1513 | 128. 5143755 |
| C18E9. 3    | 1512 | 128. 4294354 |
| F22G12. 4   | 1512 | 128. 4294354 |
| ZK1248. 3   | 1512 | 128. 4294354 |
| C01G8. 9    | 1510 | 128. 2595552 |
| T12E12. 1   | 1510 | 128. 2595552 |
| Y45F10D. 3  | 1509 | 128. 1746151 |
| ZK353. 8    | 1508 | 128. 089675  |
| F22F7. 1    | 1507 | 128. 0047349 |
| F30F8. 9    | 1505 | 127. 8348547 |
| T28F2. 4    | 1504 | 127. 7499146 |
| F41G4. 7    | 1503 | 127. 6649745 |
| Y97E10AR. 6 | 1503 | 127. 6649745 |
| K11H3. 3    | 1502 | 127. 5800344 |
| F59E12. 1   | 1501 | 127. 4950943 |
| K12H4. 3    | 1501 | 127. 4950943 |
| W03F9. 2    | 1501 | 127. 4950943 |
| Y77E11A. 10 | 1501 | 127. 4950943 |
| F55A3. 1    | 1500 | 127. 4101542 |
| F10C2. 5    | 1498 | 127. 240274  |
| C08B11. 6   | 1495 | 126. 9854537 |
| F49D11. 1   | 1495 | 126. 9854537 |
| PAR2. 3     | 1495 | 126. 9854537 |
| D2007. 5    | 1494 | 126. 9005136 |
| Y105E8A. 19 | 1494 | 126. 9005136 |
| C13F10. 6   | 1492 | 126. 7306334 |
| C47D12. 8   | 1492 | 126. 7306334 |
| C46A5. 9    | 1491 | 126. 6456933 |
| F16D3. 2    | 1491 | 126. 6456933 |
| C23H3. 5    | 1490 | 126. 5607532 |
| Y59A8B. 23  | 1490 | 126. 5607532 |
| F56C9. 1    | 1489 | 126. 4758131 |
| C06A5. 9    | 1486 | 126. 2209927 |
| F16D3. 4    | 1486 | 126. 2209927 |
| F48E8. 3    | 1485 | 126. 1360526 |
| F45G2. 7    | 1483 | 125. 9661724 |
| C46G7. 5    | 1482 | 125. 8812323 |
| Y49F6B. 4   | 1482 | 125. 8812323 |
| Y49G5B. 1   | 1482 | 125. 8812323 |
| C17G10. 1   | 1479 | 125. 626412  |
| F45G2. 10   | 1479 | 125. 626412  |



|             |      |              |
|-------------|------|--------------|
| F57B10. 11  | 1479 | 125. 626412  |
| Y51H7C. 11  | 1479 | 125. 626412  |
| F59C6. 5    | 1478 | 125. 5414719 |
| T01B7. 6    | 1478 | 125. 5414719 |
| F08B4. 1    | 1477 | 125. 4565318 |
| T20B12. 3   | 1477 | 125. 4565318 |
| F58A4. 2    | 1476 | 125. 3715917 |
| R10D12. 14  | 1476 | 125. 3715917 |
| Y41C4A. 9   | 1476 | 125. 3715917 |
| T07C4. 1    | 1475 | 125. 2866516 |
| T22F3. 2    | 1475 | 125. 2866516 |
| Y69A2AR. 16 | 1474 | 125. 2017115 |
| Y87G2A. 7   | 1474 | 125. 2017115 |
| C24G6. 3    | 1471 | 124. 9468912 |
| R06C1. 1    | 1471 | 124. 9468912 |
| ZC513. 6    | 1471 | 124. 9468912 |
| W09C5. 6    | 1470 | 124. 8619511 |
| B0365. 1    | 1468 | 124. 6920709 |
| Y47D3A. 26  | 1467 | 124. 6071308 |
| F23B12. 6   | 1463 | 124. 2673704 |
| F25D7. 1    | 1463 | 124. 2673704 |
| F43G9. 3    | 1463 | 124. 2673704 |
| T02E1. 3    | 1463 | 124. 2673704 |
| F59A3. 2    | 1462 | 124. 1824303 |
| ZK1127. 7   | 1462 | 124. 1824303 |
| F26D2. 3    | 1461 | 124. 0974902 |
| K10C3. 2    | 1459 | 123. 92761   |
| F58G1. 2    | 1458 | 123. 8426699 |
| R03D7. 4    | 1456 | 123. 6727897 |
| T24H7. 2    | 1456 | 123. 6727897 |
| R12C12. 8   | 1455 | 123. 5878496 |
| T24D1. 2    | 1454 | 123. 5029095 |
| H06I04. 3   | 1453 | 123. 4179694 |
| F02A9. 4    | 1450 | 123. 163149  |
| R05D3. 8    | 1448 | 122. 9932688 |
| F54E7. 8    | 1447 | 122. 9083287 |
| T09F3. 2    | 1447 | 122. 9083287 |
| T28B11. 1   | 1447 | 122. 9083287 |
| B0564. 2    | 1443 | 122. 5685683 |
| C30G12. 1   | 1443 | 122. 5685683 |
| K01G5. 8    | 1443 | 122. 5685683 |
| T02E1. 2    | 1443 | 122. 5685683 |
| F28B3. 10   | 1441 | 122. 3986881 |
| T09B4. 1    | 1441 | 122. 3986881 |
| C47B2. 4    | 1440 | 122. 313748  |
| R13F6. 10   | 1440 | 122. 313748  |
| W06A7. 3    | 1440 | 122. 313748  |
| C16A3. 4    | 1439 | 122. 2288079 |
| F59B2. 6    | 1439 | 122. 2288079 |
| F46B6. 6    | 1438 | 122. 1438678 |
| W06D4. 6    | 1438 | 122. 1438678 |
| C03D6. 8    | 1437 | 122. 0589277 |
| F43G9. 5    | 1437 | 122. 0589277 |
| Y59A8B. 10  | 1437 | 122. 0589277 |

|             |      |              |
|-------------|------|--------------|
| B0511. 2    | 1436 | 121. 9739876 |
| C35D10. 6   | 1436 | 121. 9739876 |
| D1014. 8    | 1436 | 121. 9739876 |
| C32F10. 1   | 1435 | 121. 8890475 |
| D2085. 4    | 1435 | 121. 8890475 |
| F08F8. 2    | 1435 | 121. 8890475 |
| F25G6. 1    | 1433 | 121. 7191673 |
| F52C6. 10   | 1433 | 121. 7191673 |
| Y18H1A. 7   | 1433 | 121. 7191673 |
| Y73E7A. 9   | 1431 | 121. 5492871 |
| F33G12. 5   | 1430 | 121. 464347  |
| F44E2. 7    | 1430 | 121. 464347  |
| Y55F3AL. 1  | 1430 | 121. 464347  |
| Y38A10A. 5  | 1429 | 121. 3794069 |
| Y55B1AR. 2  | 1429 | 121. 3794069 |
| C01B4. 9    | 1427 | 121. 2095267 |
| Y37H2A. 5   | 1427 | 121. 2095267 |
| T13B5. 8    | 1426 | 121. 1245866 |
| Y77E11A. 7  | 1426 | 121. 1245866 |
| M01E11. 3   | 1423 | 120. 8697663 |
| ZK829. 7    | 1423 | 120. 8697663 |
| Y55F3AM. 14 | 1421 | 120. 6998861 |
| ZC262. 3    | 1420 | 120. 614946  |
| B0024. 10   | 1419 | 120. 5300059 |
| E04A4. 8    | 1419 | 120. 5300059 |
| Y39B6A. 3   | 1417 | 120. 3601257 |
| F20C5. 1    | 1416 | 120. 2751855 |
| F09E8. 2    | 1414 | 120. 1053053 |
| H24K24. 3   | 1414 | 120. 1053053 |
| B0001. 2    | 1413 | 120. 0203652 |
| F43D9. 3    | 1413 | 120. 0203652 |
| ZK742. 2    | 1412 | 119. 9354251 |
| B0035. 15   | 1410 | 119. 7655449 |
| Y57A10A. 13 | 1408 | 119. 5956647 |
| K06A5. 6    | 1405 | 119. 3408444 |
| C16C10. 4   | 1404 | 119. 2559043 |
| F39H2. 2    | 1403 | 119. 1709642 |
| B0393. 3    | 1402 | 119. 0860241 |
| T09E8. 1    | 1401 | 119. 001084  |
| Y92H12A. 1  | 1400 | 118. 9161439 |
| C34G6. 1    | 1398 | 118. 7462637 |
| F58G11. 6   | 1398 | 118. 7462637 |
| K10C3. 5    | 1398 | 118. 7462637 |
| T07A5. 6    | 1398 | 118. 7462637 |
| Y48E1B. 5   | 1398 | 118. 7462637 |
| Y116A8A. 9  | 1395 | 118. 4914434 |
| F45G2. 9    | 1392 | 118. 2366231 |
| Y73F8A. 33  | 1392 | 118. 2366231 |
| C01G8. 5    | 1391 | 118. 151683  |
| F56D1. 7    | 1390 | 118. 0667429 |
| Y94H6A. 10  | 1390 | 118. 0667429 |
| T06E6. 1    | 1388 | 117. 8968627 |
| JC8. 10     | 1387 | 117. 8119226 |
| Y23H5A. 7   | 1387 | 117. 8119226 |

|             |      |              |
|-------------|------|--------------|
| W04A8. 9    | 1386 | 117. 7269825 |
| C23H3. 4    | 1385 | 117. 6420424 |
| C37C3. 2    | 1385 | 117. 6420424 |
| K03H4. 2    | 1385 | 117. 6420424 |
| R151. 7     | 1385 | 117. 6420424 |
| Y54E10A. 10 | 1384 | 117. 5571023 |
| K01B6. 1    | 1383 | 117. 4721622 |
| C34C12. 2   | 1382 | 117. 3872221 |
| C34E10. 4   | 1382 | 117. 3872221 |
| K04G7. 10   | 1382 | 117. 3872221 |
| M57. 2      | 1382 | 117. 3872221 |
| W01D2. 5    | 1382 | 117. 3872221 |
| Y43C5A. 6   | 1382 | 117. 3872221 |
| T13H5. 7    | 1381 | 117. 3022819 |
| Y71F9B. 10  | 1381 | 117. 3022819 |
| F20D6. 4    | 1380 | 117. 2173418 |
| T10E9. 1    | 1380 | 117. 2173418 |
| Y44E3A. 1   | 1380 | 117. 2173418 |
| T24B1. 1    | 1378 | 117. 0474616 |
| F15D3. 6    | 1377 | 116. 9625215 |
| R11A5. 2    | 1377 | 116. 9625215 |
| F26H11. 6   | 1376 | 116. 8775814 |
| C47G2. 4    | 1375 | 116. 7926413 |
| K11D2. 5    | 1373 | 116. 6227611 |
| C05D11. 8   | 1372 | 116. 537821  |
| C41G7. 4    | 1372 | 116. 537821  |
| R107. 4     | 1372 | 116. 537821  |
| F27D4. 5    | 1371 | 116. 4528809 |
| VF36H2L. 1  | 1371 | 116. 4528809 |
| Y41D4B. 4   | 1371 | 116. 4528809 |
| ZC53. 6     | 1371 | 116. 4528809 |
| ZK484. 4    | 1371 | 116. 4528809 |
| T08A11. 2   | 1370 | 116. 3679408 |
| Y39A3CR. 3  | 1369 | 116. 2830007 |
| C48B4. 11   | 1368 | 116. 1980606 |
| F33H1. 2    | 1368 | 116. 1980606 |
| K12C11. 1   | 1368 | 116. 1980606 |
| F02E9. 7    | 1367 | 116. 1131205 |
| ZC376. 7    | 1367 | 116. 1131205 |
| F18C5. 3    | 1366 | 116. 0281804 |
| F36A2. 9    | 1365 | 115. 9432403 |
| K08F9. 2    | 1365 | 115. 9432403 |
| C05C8. 6    | 1364 | 115. 8583002 |
| F10E9. 8    | 1364 | 115. 8583002 |
| F52B11. 1   | 1363 | 115. 7733601 |
| Y76A2B. 1   | 1363 | 115. 7733601 |
| F43C1. 6    | 1362 | 115. 68842   |
| F59A7. 9    | 1360 | 115. 5185398 |
| F14D2. 14   | 1359 | 115. 4335997 |
| C17D12. 7   | 1358 | 115. 3486596 |
| C32F10. 5   | 1357 | 115. 2637195 |
| Y55D9A. 1   | 1357 | 115. 2637195 |
| Y66D12A. 17 | 1357 | 115. 2637195 |
| T27E9. 5    | 1356 | 115. 1787794 |

|             |      |              |
|-------------|------|--------------|
| F48F5. 5    | 1354 | 115. 0088992 |
| T10B11. 2   | 1349 | 114. 5841987 |
| Y105E8B. 4  | 1348 | 114. 4992586 |
| C30C11. 2   | 1347 | 114. 4143185 |
| F10E9. 3    | 1346 | 114. 3293784 |
| M03C11. 7   | 1346 | 114. 3293784 |
| Y71F9B. 8   | 1346 | 114. 3293784 |
| K02F3. 11   | 1344 | 114. 1594981 |
| T02G5. 8    | 1344 | 114. 1594981 |
| Y45F10D. 12 | 1343 | 114. 074558  |
| Y53H1C. 2   | 1343 | 114. 074558  |
| C28H8. 4    | 1342 | 113. 9896179 |
| W02B12. 8   | 1342 | 113. 9896179 |
| C13B9. 2    | 1341 | 113. 9046778 |
| C43E11. 1   | 1341 | 113. 9046778 |
| R06A4. 6    | 1341 | 113. 9046778 |
| F59E12. 9   | 1340 | 113. 8197377 |
| Y47D7A. 16  | 1340 | 113. 8197377 |
| C07G2. 1    | 1339 | 113. 7347976 |
| F58E10. 4   | 1339 | 113. 7347976 |
| C26C6. 3    | 1338 | 113. 6498575 |
| C27H5. 3    | 1338 | 113. 6498575 |
| F48C1. 5    | 1338 | 113. 6498575 |
| F25B4. 1    | 1337 | 113. 5649174 |
| ZK632. 4    | 1337 | 113. 5649174 |
| B0412. 3    | 1336 | 113. 4799773 |
| F53B7. 3    | 1334 | 113. 3100971 |
| Y39A1A. 15  | 1334 | 113. 3100971 |
| Y87G2A. 11  | 1334 | 113. 3100971 |
| F58G11. 1   | 1333 | 113. 225157  |
| K09H9. 7    | 1332 | 113. 1402169 |
| R01B10. 5   | 1332 | 113. 1402169 |
| T23B3. 1    | 1332 | 113. 1402169 |
| Y110A2AR. 1 | 1331 | 113. 0552768 |
| R07B7. 3    | 1330 | 112. 9703367 |
| W04A8. 7    | 1330 | 112. 9703367 |
| Y47D3A. 6   | 1329 | 112. 8853966 |
| Y69A2AR. 32 | 1329 | 112. 8853966 |
| C10H11. 1   | 1328 | 112. 8004565 |
| T19A6. 1    | 1328 | 112. 8004565 |
| Y39A1C. 2   | 1326 | 112. 6305763 |
| EEED8. 7    | 1325 | 112. 5456362 |
| M01D7. 7    | 1325 | 112. 5456362 |
| C27H6. 9    | 1323 | 112. 375756  |
| F53F4. 11   | 1323 | 112. 375756  |
| K01C8. 3    | 1323 | 112. 375756  |
| T19A6. 2    | 1323 | 112. 375756  |
| T03D8. 1    | 1322 | 112. 2908159 |
| F42G9. 1    | 1321 | 112. 2058758 |
| C30H6. 7    | 1320 | 112. 1209357 |
| C52E4. 4    | 1320 | 112. 1209357 |
| F21D5. 1    | 1320 | 112. 1209357 |
| Y108G3AL. 7 | 1320 | 112. 1209357 |
| C50F2. 3    | 1319 | 112. 0359956 |

|             |      |              |
|-------------|------|--------------|
| Y87G2A. 13  | 1319 | 112. 0359956 |
| Y105E8A. 10 | 1317 | 111. 8661154 |
| F59B2. 5    | 1316 | 111. 7811753 |
| W07G4. 3    | 1316 | 111. 7811753 |
| Y53F4B. 17  | 1316 | 111. 7811753 |
| C37C3. 9    | 1315 | 111. 6962352 |
| F13B10. 2   | 1314 | 111. 6112951 |
| Y48G1C. 10  | 1313 | 111. 526355  |
| F35G12. 2   | 1312 | 111. 4414149 |
| K08B12. 5   | 1311 | 111. 3564748 |
| T23B5. 3    | 1311 | 111. 3564748 |
| T17E9. 1    | 1310 | 111. 2715347 |
| ZK262. 8    | 1310 | 111. 2715347 |
| T12D8. 8    | 1309 | 111. 1865945 |
| Y50D7A. 7   | 1306 | 110. 9317742 |
| F42G9. 6    | 1305 | 110. 8468341 |
| Y77E11A. 11 | 1305 | 110. 8468341 |
| ZK1127. 9   | 1305 | 110. 8468341 |
| F52C6. 3    | 1304 | 110. 761894  |
| T07C4. 8    | 1304 | 110. 761894  |
| D2030. 8    | 1303 | 110. 6769539 |
| F25B5. 3    | 1303 | 110. 6769539 |
| R09A1. 1    | 1302 | 110. 5920138 |
| F08A8. 7    | 1301 | 110. 5070737 |
| Y39G10AR. 2 | 1301 | 110. 5070737 |
| Y49F6B. 10  | 1301 | 110. 5070737 |
| Y97E10AR. 4 | 1301 | 110. 5070737 |
| T05E8. 2    | 1299 | 110. 3371935 |
| Y56A3A. 13  | 1299 | 110. 3371935 |
| T05E11. 5   | 1297 | 110. 1673133 |
| Y51H7C. 6   | 1297 | 110. 1673133 |
| Y55F3BR. 8  | 1297 | 110. 1673133 |
| Y75B8A. 33  | 1297 | 110. 1673133 |
| C31H1. 8    | 1296 | 110. 0823732 |
| Y41E3. 9    | 1296 | 110. 0823732 |
| F14E5. 2    | 1295 | 109. 9974331 |
| Y71F9AL. 16 | 1294 | 109. 912493  |
| R03D7. 7    | 1291 | 109. 6576727 |
| R11E3. 7    | 1291 | 109. 6576727 |
| Y49A3A. 2   | 1291 | 109. 6576727 |
| W02D3. 2    | 1289 | 109. 4877925 |
| C27A2. 6    | 1286 | 109. 2329722 |
| H20J04. 2   | 1286 | 109. 2329722 |
| Y105E8A. 16 | 1286 | 109. 2329722 |
| F12F6. 7    | 1285 | 109. 1480321 |
| Y57G11C. 13 | 1285 | 109. 1480321 |
| F41G3. 14   | 1284 | 109. 063092  |
| F59H6. 2    | 1284 | 109. 063092  |
| C05C10. 6   | 1283 | 108. 9781519 |
| C50D2. 10   | 1283 | 108. 9781519 |
| Y46G5A. 18  | 1283 | 108. 9781519 |
| C47B2. 5    | 1282 | 108. 8932118 |
| M01E11. 5   | 1282 | 108. 8932118 |
| R07H5. 2    | 1282 | 108. 8932118 |

|              |      |              |
|--------------|------|--------------|
| T05F1. 6     | 1282 | 108. 8932118 |
| Y7A5A. 6     | 1281 | 108. 8082717 |
| Y39A3CL. 6   | 1280 | 108. 7233316 |
| Y46H3A. 6    | 1279 | 108. 6383915 |
| ZK637. 3     | 1278 | 108. 5534514 |
| F14D2. 1     | 1277 | 108. 4685113 |
| F26H11. 5    | 1277 | 108. 4685113 |
| Y74C10AR. 3  | 1277 | 108. 4685113 |
| F22B3. 1     | 1275 | 108. 2986311 |
| F33E11. 3    | 1275 | 108. 2986311 |
| T09B4. 10    | 1275 | 108. 2986311 |
| T18H9. 6     | 1275 | 108. 2986311 |
| C05C10. 7    | 1272 | 108. 0438107 |
| C14B1. 6     | 1270 | 107. 8739305 |
| C34D4. 10    | 1270 | 107. 8739305 |
| C17E4. 6     | 1269 | 107. 7889904 |
| C18A3. 3     | 1269 | 107. 7889904 |
| E01A2. 4     | 1269 | 107. 7889904 |
| F41H10. 4    | 1269 | 107. 7889904 |
| Y49E10. 21   | 1269 | 107. 7889904 |
| T01B7. 3     | 1268 | 107. 7040503 |
| ZC262. 8     | 1268 | 107. 7040503 |
| BE0003N10. 2 | 1267 | 107. 6191102 |
| Y73F8A. 34   | 1267 | 107. 6191102 |
| W02D9. 3     | 1266 | 107. 5341701 |
| Y53C12A. 3   | 1265 | 107. 44923   |
| B0495. 9     | 1263 | 107. 2793498 |
| Y54E5A. 8    | 1263 | 107. 2793498 |
| C46F11. 4    | 1261 | 107. 1094696 |
| C55A6. 2     | 1259 | 106. 9395894 |
| F26A3. 7     | 1259 | 106. 9395894 |
| T23G11. 3    | 1259 | 106. 9395894 |
| E01G4. 5     | 1257 | 106. 7697092 |
| F28C6. 3     | 1257 | 106. 7697092 |
| Y41C4A. 14   | 1257 | 106. 7697092 |
| ZK1236. 5    | 1257 | 106. 7697092 |
| F58A4. 8     | 1255 | 106. 599829  |
| K03B4. 1     | 1255 | 106. 599829  |
| F54C8. 7     | 1253 | 106. 4299488 |
| Y38E10A. 6   | 1252 | 106. 3450087 |
| C14B1. 10    | 1251 | 106. 2600686 |
| F43C1. 3     | 1251 | 106. 2600686 |
| F59E10. 2    | 1251 | 106. 2600686 |
| R01H10. 6    | 1250 | 106. 1751285 |
| C39B5. 6     | 1249 | 106. 0901884 |
| F56D12. 5    | 1249 | 106. 0901884 |
| C34E10. 8    | 1248 | 106. 0052483 |
| K08E4. 6     | 1248 | 106. 0052483 |
| W03F9. 10    | 1248 | 106. 0052483 |
| Y116A8C. 28  | 1248 | 106. 0052483 |
| Y54E10A. 11  | 1248 | 106. 0052483 |
| F58B3. 5     | 1245 | 105. 750428  |
| R09E12. 3    | 1245 | 105. 750428  |
| T07D4. 3     | 1244 | 105. 6654879 |

|             |      |              |
|-------------|------|--------------|
| T12C9. 7    | 1244 | 105. 6654879 |
| T21B10. 4   | 1244 | 105. 6654879 |
| W03A3. 2    | 1244 | 105. 6654879 |
| D2013. 6    | 1242 | 105. 4956077 |
| T09A5. 12   | 1241 | 105. 4106676 |
| Y110A2AM. 3 | 1241 | 105. 4106676 |
| Y39B6A. 35  | 1241 | 105. 4106676 |
| Y51A2D. 7   | 1241 | 105. 4106676 |
| Y67H2A. 4   | 1240 | 105. 3257275 |
| C09H10. 6   | 1239 | 105. 2407874 |
| R53. 2      | 1238 | 105. 1558473 |
| T25D3. 3    | 1237 | 105. 0709071 |
| Y71H2AM. 7  | 1237 | 105. 0709071 |
| C49C3. 7    | 1236 | 104. 985967  |
| R151. 9     | 1236 | 104. 985967  |
| Y111B2A. 19 | 1236 | 104. 985967  |
| C13G5. 2    | 1235 | 104. 9010269 |
| F54H12. 1   | 1235 | 104. 9010269 |
| Y53F4B. 21  | 1235 | 104. 9010269 |
| F43G9. 12   | 1234 | 104. 8160868 |
| R05H10. 5   | 1231 | 104. 5612665 |
| Y46E12BL. 4 | 1231 | 104. 5612665 |
| F59G1. 5    | 1230 | 104. 4763264 |
| Y71G12B. 15 | 1230 | 104. 4763264 |
| C26E6. 6    | 1229 | 104. 3913863 |
| ZK1151. 1   | 1229 | 104. 3913863 |
| F59A2. 6    | 1228 | 104. 3064462 |
| H19N07. 1   | 1228 | 104. 3064462 |
| F26F2. 7    | 1227 | 104. 2215061 |
| Y87G2A. 1   | 1226 | 104. 136566  |
| ZC513. 4    | 1226 | 104. 136566  |
| C02B10. 4   | 1225 | 104. 0516259 |
| F42C5. 8    | 1225 | 104. 0516259 |
| R144. 2     | 1223 | 103. 8817457 |
| K09B11. 2   | 1222 | 103. 7968056 |
| Y71H2B. 5   | 1222 | 103. 7968056 |
| K08F11. 1   | 1221 | 103. 7118655 |
| M28. 5      | 1221 | 103. 7118655 |
| ZK546. 17   | 1218 | 103. 4570452 |
| Y66D12A. 9  | 1217 | 103. 3721051 |
| D2096. 12   | 1216 | 103. 287165  |
| Y23H5B. 6   | 1216 | 103. 287165  |
| F37B12. 2   | 1214 | 103. 1172848 |
| R151. 6     | 1214 | 103. 1172848 |
| T07D4. 4    | 1214 | 103. 1172848 |
| C05D11. 9   | 1213 | 103. 0323447 |
| F44E7. 5    | 1213 | 103. 0323447 |
| C18D4. 6    | 1212 | 102. 9474046 |
| F28C1. 1    | 1212 | 102. 9474046 |
| Y113G7B. 5  | 1212 | 102. 9474046 |
| Y71H2AM. 8  | 1210 | 102. 7775244 |
| T28F3. 3    | 1208 | 102. 6076442 |
| F11G11. 7   | 1207 | 102. 5227041 |
| T05H4. 11   | 1204 | 102. 2678838 |

|             |      |              |
|-------------|------|--------------|
| Y37E11AM. 3 | 1204 | 102. 2678838 |
| Y46C8AL. 9  | 1204 | 102. 2678838 |
| Y105E8B. 8  | 1203 | 102. 1829437 |
| ZK370. 8    | 1203 | 102. 1829437 |
| B0414. 6    | 1202 | 102. 0980036 |
| F36A2. 1    | 1202 | 102. 0980036 |
| F41B5. 1    | 1202 | 102. 0980036 |
| C07H6. 6    | 1201 | 102. 0130634 |
| F58D5. 3    | 1201 | 102. 0130634 |
| Y73B3A. 9   | 1201 | 102. 0130634 |
| M04F3. 5    | 1200 | 101. 9281233 |
| ZK546. 5    | 1200 | 101. 9281233 |
| E04A4. 5    | 1196 | 101. 5883629 |
| F54C1. 2    | 1196 | 101. 5883629 |
| K10C3. 6    | 1196 | 101. 5883629 |
| C34B7. 2    | 1195 | 101. 5034228 |
| E04A4. 4    | 1195 | 101. 5034228 |
| T23G7. 4    | 1195 | 101. 5034228 |
| F43H9. 3    | 1194 | 101. 4184827 |
| T23G7. 2    | 1194 | 101. 4184827 |
| C16A11. 2   | 1193 | 101. 3335426 |
| Y48C3A. 7   | 1193 | 101. 3335426 |
| C26E6. 7    | 1192 | 101. 2486025 |
| T28A8. 4    | 1189 | 100. 9937822 |
| B0303. 9    | 1188 | 100. 9088421 |
| C43E11. 9   | 1188 | 100. 9088421 |
| H04D03. 3   | 1188 | 100. 9088421 |
| ZK829. 4    | 1188 | 100. 9088421 |
| D1037. 4    | 1187 | 100. 823902  |
| Y56A3A. 27  | 1187 | 100. 823902  |
| T01C3. 3    | 1186 | 100. 7389619 |
| T12D8. 5    | 1186 | 100. 7389619 |
| W02H5. 2    | 1186 | 100. 7389619 |
| F22D6. 5    | 1185 | 100. 6540218 |
| T23B12. 3   | 1185 | 100. 6540218 |
| C48B4. 8    | 1184 | 100. 5690817 |
| C53D6. 4    | 1183 | 100. 4841416 |
| F18A1. 2    | 1183 | 100. 4841416 |
| T26A5. 1    | 1183 | 100. 4841416 |
| Y48E1B. 12  | 1182 | 100. 3992015 |
| F15D4. 6    | 1181 | 100. 3142614 |
| F29D11. 2   | 1181 | 100. 3142614 |
| F57A10. 3   | 1180 | 100. 2293213 |
| K07A1. 12   | 1180 | 100. 2293213 |
| Y62E10A. 14 | 1180 | 100. 2293213 |
| C18H2. 1    | 1179 | 100. 1443812 |
| B0546. 2    | 1177 | 99. 97450098 |
| T10F2. 4    | 1177 | 99. 97450098 |
| C41C4. 6    | 1175 | 99. 80462078 |
| T05E11. 3   | 1175 | 99. 80462078 |
| C01G6. 5    | 1174 | 99. 71968067 |
| Y38F2AL. 2  | 1173 | 99. 63474057 |
| F28D1. 1    | 1172 | 99. 54980047 |
| W08F4. 8    | 1172 | 99. 54980047 |



|             |      |              |
|-------------|------|--------------|
| Y47G6A. 7   | 1172 | 99. 54980047 |
| K05C4. 6    | 1171 | 99. 46486036 |
| F28F8. 7    | 1169 | 99. 29498016 |
| F54A3. 3    | 1169 | 99. 29498016 |
| K07C5. 1    | 1169 | 99. 29498016 |
| Y45F3A. 3   | 1169 | 99. 29498016 |
| Y53F4B. 13  | 1168 | 99. 21004006 |
| F10G8. 7    | 1167 | 99. 12509995 |
| K08F4. 2    | 1167 | 99. 12509995 |
| ZK858. 7    | 1167 | 99. 12509995 |
| B0393. 1    | 1166 | 99. 04015985 |
| C36B1. 3    | 1166 | 99. 04015985 |
| C32E8. 10   | 1165 | 98. 95521975 |
| C55B7. 11   | 1165 | 98. 95521975 |
| W02A2. 7    | 1165 | 98. 95521975 |
| Y80D3A. 2   | 1165 | 98. 95521975 |
| Y37H2A. 1   | 1164 | 98. 87027964 |
| H06I04. 2   | 1163 | 98. 78533954 |
| C28H8. 9    | 1162 | 98. 70039944 |
| R12E2. 2    | 1162 | 98. 70039944 |
| H04J21. 3   | 1161 | 98. 61545934 |
| Y47D3A. 22  | 1161 | 98. 61545934 |
| Y49F6B. 2   | 1161 | 98. 61545934 |
| C05D2. 6    | 1160 | 98. 53051923 |
| T05F1. 2    | 1160 | 98. 53051923 |
| Y65B4BR. 5  | 1160 | 98. 53051923 |
| C49H3. 3    | 1159 | 98. 44557913 |
| F43E2. 8    | 1159 | 98. 44557913 |
| R12C12. 7   | 1159 | 98. 44557913 |
| Y66D12A. 15 | 1158 | 98. 36063903 |
| M01H9. 3    | 1156 | 98. 19075882 |
| C32E8. 2    | 1155 | 98. 10581872 |
| T01E8. 6    | 1155 | 98. 10581872 |
| W02D3. 4    | 1155 | 98. 10581872 |
| T05H10. 6   | 1154 | 98. 02087862 |
| Y38C1AA. 2  | 1153 | 97. 93593851 |
| F16A11. 1   | 1152 | 97. 85099841 |
| Y17G7B. 15  | 1151 | 97. 76605831 |
| Y92H12BR. 8 | 1151 | 97. 76605831 |
| T10E9. 7    | 1149 | 97. 5961781  |
| B0205. 3    | 1147 | 97. 4262979  |
| C49H3. 6    | 1147 | 97. 4262979  |
| Y56A3A. 21  | 1147 | 97. 4262979  |
| Y59A8B. 13  | 1147 | 97. 4262979  |
| K04B12. 3   | 1146 | 97. 34135779 |
| Y39C12A. 8  | 1145 | 97. 25641769 |
| ZK858. 5    | 1144 | 97. 17147759 |
| W02F12. 5   | 1142 | 97. 00159738 |
| F25B3. 6    | 1141 | 96. 91665728 |
| B0035. 9    | 1140 | 96. 83171718 |
| F35G2. 2    | 1139 | 96. 74677708 |
| C07H6. 2    | 1138 | 96. 66183697 |
| F36H1. 4    | 1137 | 96. 57689687 |
| W09B7. 2    | 1136 | 96. 49195677 |

|             |      |              |
|-------------|------|--------------|
| F54E12. 3   | 1135 | 96. 40701666 |
| K11D2. 2    | 1135 | 96. 40701666 |
| Y48A6B. 10  | 1135 | 96. 40701666 |
| F43G9. 9    | 1133 | 96. 23713646 |
| ZC477. 3    | 1133 | 96. 23713646 |
| C14C10. 4   | 1132 | 96. 15219636 |
| Y20F4. 3    | 1129 | 95. 89737605 |
| ZC132. 4    | 1129 | 95. 89737605 |
| ZK1307. 9   | 1129 | 95. 89737605 |
| C16A3. 6    | 1128 | 95. 81243594 |
| Y110A7A. 8  | 1128 | 95. 81243594 |
| Y48G1A. 6   | 1128 | 95. 81243594 |
| F23C8. 5    | 1127 | 95. 72749584 |
| T08G5. 5    | 1127 | 95. 72749584 |
| Y105E8A. 14 | 1126 | 95. 64255574 |
| ZK418. 9    | 1126 | 95. 64255574 |
| C24H12. 4   | 1125 | 95. 55761564 |
| F08F3. 8    | 1124 | 95. 47267553 |
| F23B12. 5   | 1124 | 95. 47267553 |
| C03A7. 2    | 1122 | 95. 30279533 |
| F40G9. 3    | 1121 | 95. 21785523 |
| Y55B1BM. 1  | 1120 | 95. 13291512 |
| D2096. 3    | 1119 | 95. 04797502 |
| T09B4. 9    | 1119 | 95. 04797502 |
| R151. 8     | 1118 | 94. 96303492 |
| Y24D9A. 8   | 1118 | 94. 96303492 |
| F39G3. 8    | 1116 | 94. 79315471 |
| C18E9. 6    | 1115 | 94. 70821461 |
| C41D11. 3   | 1115 | 94. 70821461 |
| W04A4. 5    | 1115 | 94. 70821461 |
| Y108F1. 3   | 1115 | 94. 70821461 |
| C33H5. 12   | 1114 | 94. 62327451 |
| F55C12. 5   | 1114 | 94. 62327451 |
| H38K22. 2   | 1114 | 94. 62327451 |
| Y104H12D. 3 | 1114 | 94. 62327451 |
| Y113G7B. 18 | 1114 | 94. 62327451 |
| C18A3. 2    | 1113 | 94. 5383344  |
| Y57A10A. 16 | 1113 | 94. 5383344  |
| Y76A2A. 2   | 1113 | 94. 5383344  |
| C41G7. 3    | 1112 | 94. 4533943  |
| F21H12. 6   | 1112 | 94. 4533943  |
| Y37E3. 11   | 1110 | 94. 28351409 |
| C06E7. 3    | 1109 | 94. 19857399 |
| F21C3. 4    | 1109 | 94. 19857399 |
| T19A6. 4    | 1109 | 94. 19857399 |
| Y54E10BR. 6 | 1109 | 94. 19857399 |
| F41G3. 6    | 1107 | 94. 02869379 |
| T16H12. 5   | 1107 | 94. 02869379 |
| Y54G2A. 17  | 1107 | 94. 02869379 |
| D1081. 8    | 1106 | 93. 94375368 |
| F23B12. 7   | 1105 | 93. 85881358 |
| Y57G11C. 11 | 1105 | 93. 85881358 |
| C25D7. 8    | 1104 | 93. 77387348 |
| F10B5. 1    | 1104 | 93. 77387348 |

|             |      |              |
|-------------|------|--------------|
| Y38H6C. 10  | 1104 | 93. 77387348 |
| Y55F3BR. 10 | 1104 | 93. 77387348 |
| C44B7. 2    | 1103 | 93. 68893337 |
| F32E10. 6   | 1103 | 93. 68893337 |
| Y111B2A. 8  | 1103 | 93. 68893337 |
| B0285. 5    | 1102 | 93. 60399327 |
| Y48C3A. 14  | 1102 | 93. 60399327 |
| Y54G11A. 10 | 1101 | 93. 51905317 |
| C06C3. 1    | 1100 | 93. 43411307 |
| F32E10. 1   | 1100 | 93. 43411307 |
| Y34D9A. 10  | 1100 | 93. 43411307 |
| Y71F9AL. 4  | 1100 | 93. 43411307 |
| T24C4. 1    | 1099 | 93. 34917296 |
| F45H11. 3   | 1098 | 93. 26423286 |
| Y71H2AM. 23 | 1098 | 93. 26423286 |
| K10F12. 3   | 1096 | 93. 09435266 |
| C35E7. 8    | 1095 | 93. 00941255 |
| F43E2. 7    | 1095 | 93. 00941255 |
| B0304. 2    | 1093 | 92. 83953235 |
| C06A8. 2    | 1093 | 92. 83953235 |
| W10D9. 5    | 1092 | 92. 75459224 |
| C30F12. 4   | 1090 | 92. 58471204 |
| F28F8. 6    | 1090 | 92. 58471204 |
| Y37D8A. 11  | 1090 | 92. 58471204 |
| T10G3. 6    | 1089 | 92. 49977194 |
| Y66D12A. 8  | 1088 | 92. 41483183 |
| C09H10. 3   | 1087 | 92. 32989173 |
| C18F10. 7   | 1085 | 92. 16001152 |
| F11A10. 5   | 1085 | 92. 16001152 |
| F33D11. 12  | 1085 | 92. 16001152 |
| T04C4. 1    | 1085 | 92. 16001152 |
| C25A1. 3    | 1084 | 92. 07507142 |
| Y49E10. 6   | 1084 | 92. 07507142 |
| F10C5. 1    | 1083 | 91. 99013132 |
| H06H21. 3   | 1083 | 91. 99013132 |
| T08B2. 7    | 1083 | 91. 99013132 |
| Y48G1A. 4   | 1083 | 91. 99013132 |
| M01E5. 5    | 1082 | 91. 90519122 |
| F53F4. 14   | 1081 | 91. 82025111 |
| ZK1127. 5   | 1080 | 91. 73531101 |
| C32D5. 10   | 1079 | 91. 65037091 |
| F18A1. 4    | 1079 | 91. 65037091 |
| M05D6. 6    | 1079 | 91. 65037091 |
| C12D8. 10   | 1078 | 91. 56543081 |
| Y53F4B. 42  | 1078 | 91. 56543081 |
| Y25C1A. 5   | 1077 | 91. 4804907  |
| C34C6. 4    | 1076 | 91. 3955506  |
| F49E8. 2    | 1076 | 91. 3955506  |
| ZC317. 7    | 1076 | 91. 3955506  |
| F28B3. 6    | 1075 | 91. 3106105  |
| T16G12. 5   | 1075 | 91. 3106105  |
| Y41D4A. 6   | 1074 | 91. 22567039 |
| ZK973. 3    | 1074 | 91. 22567039 |
| C14C11. 7   | 1073 | 91. 14073029 |

|             |      |              |
|-------------|------|--------------|
| F56D1. 2    | 1073 | 91. 14073029 |
| C36E8. 1    | 1072 | 91. 05579019 |
| F10G7. 8    | 1072 | 91. 05579019 |
| F57H12. 1   | 1072 | 91. 05579019 |
| T09A5. 8    | 1072 | 91. 05579019 |
| C34E10. 2   | 1071 | 90. 97085009 |
| Y75B8A. 8   | 1071 | 90. 97085009 |
| ZC168. 3    | 1071 | 90. 97085009 |
| F20B6. 5    | 1068 | 90. 71602978 |
| F53C3. 13   | 1068 | 90. 71602978 |
| F57B10. 12  | 1068 | 90. 71602978 |
| Y105E8A. 12 | 1068 | 90. 71602978 |
| Y48E1C. 4   | 1068 | 90. 71602978 |
| Y64H9A. 1   | 1068 | 90. 71602978 |
| C25D7. 3    | 1067 | 90. 63108967 |
| C49H3. 11   | 1065 | 90. 46120947 |
| F54C9. 9    | 1062 | 90. 20638916 |
| F59A2. 4    | 1061 | 90. 12144906 |
| T10B11. 3   | 1061 | 90. 12144906 |
| Y54G11A. 3  | 1061 | 90. 12144906 |
| F13B12. 6   | 1060 | 90. 03650896 |
| F25H2. 6    | 1060 | 90. 03650896 |
| M01E11. 2   | 1060 | 90. 03650896 |
| F58B3. 6    | 1059 | 89. 95156885 |
| Y39B6A. 2   | 1059 | 89. 95156885 |
| F10B5. 2    | 1058 | 89. 86662875 |
| F39B2. 1    | 1058 | 89. 86662875 |
| R05F9. 9    | 1057 | 89. 78168865 |
| EEED8. 5    | 1056 | 89. 69674854 |
| W09H1. 4    | 1056 | 89. 69674854 |
| Y46H3A. 7   | 1055 | 89. 61180844 |
| C26E6. 5    | 1054 | 89. 52686834 |
| Y48E1B. 14  | 1054 | 89. 52686834 |
| F01F1. 7    | 1053 | 89. 44192824 |
| R151. 3     | 1052 | 89. 35698813 |
| D2023. 5    | 1051 | 89. 27204803 |
| Y39G10AR. 9 | 1051 | 89. 27204803 |
| F38E9. 4    | 1049 | 89. 10216782 |
| F59G1. 3    | 1048 | 89. 01722772 |
| T05H4. 12   | 1048 | 89. 01722772 |
| Y47H9C. 7   | 1048 | 89. 01722772 |
| Y48C3A. 20  | 1047 | 88. 93228762 |
| ZC410. 3    | 1047 | 88. 93228762 |
| C01G5. 8    | 1046 | 88. 84734752 |
| F25B5. 4    | 1046 | 88. 84734752 |
| F53F10. 4   | 1046 | 88. 84734752 |
| F46C5. 8    | 1045 | 88. 76240741 |
| PAR2. 1     | 1045 | 88. 76240741 |
| C27A2. 1    | 1044 | 88. 67746731 |
| C14B1. 12   | 1043 | 88. 59252721 |
| K06A5. 7    | 1042 | 88. 5075871  |
| Y24D9A. 4   | 1041 | 88. 422647   |
| F18A1. 6    | 1040 | 88. 3377069  |
| C32D5. 9    | 1039 | 88. 2527668  |

|             |      |              |
|-------------|------|--------------|
| F28C6. 2    | 1039 | 88. 2527668  |
| F30A10. 10  | 1039 | 88. 2527668  |
| Y95B8A. 11  | 1039 | 88. 2527668  |
| H26D21. 1   | 1038 | 88. 16782669 |
| W06F12. 1   | 1038 | 88. 16782669 |
| Y17G7B. 20  | 1038 | 88. 16782669 |
| F54D10. 5   | 1037 | 88. 08288659 |
| F59A2. 2    | 1037 | 88. 08288659 |
| W10C8. 2    | 1036 | 87. 99794649 |
| Y48G10A. 2  | 1036 | 87. 99794649 |
| R07E5. 1    | 1035 | 87. 91300639 |
| ZK795. 3    | 1035 | 87. 91300639 |
| Y47G6A. 10  | 1034 | 87. 82806628 |
| Y53F4B. 12  | 1033 | 87. 74312618 |
| R09B3. 1    | 1032 | 87. 65818608 |
| Y53G8AR. 8  | 1032 | 87. 65818608 |
| Y71H2AM. 11 | 1031 | 87. 57324597 |
| F13H8. 2    | 1030 | 87. 48830587 |
| Y57A10A. 3  | 1030 | 87. 48830587 |
| C50B8. 2    | 1029 | 87. 40336577 |
| D2013. 2    | 1029 | 87. 40336577 |
| R74. 5      | 1029 | 87. 40336577 |
| Y54H5A. 3   | 1029 | 87. 40336577 |
| C07H6. 4    | 1028 | 87. 31842567 |
| ZK856. 18   | 1028 | 87. 31842567 |
| F20C5. 2    | 1027 | 87. 23348556 |
| B0285. 7    | 1026 | 87. 14854546 |
| M01B12. 4   | 1026 | 87. 14854546 |
| Y116A8C. 13 | 1025 | 87. 06360536 |
| ZK355. 2    | 1025 | 87. 06360536 |
| AC8. 3      | 1023 | 86. 89372515 |
| B0457. 1    | 1022 | 86. 80878505 |
| F55F8. 2    | 1022 | 86. 80878505 |
| T06G6. 9    | 1022 | 86. 80878505 |
| Y46G5A. 1   | 1021 | 86. 72384495 |
| C14A4. 3    | 1020 | 86. 63890484 |
| R09H3. 3    | 1020 | 86. 63890484 |
| Y111B2A. 1  | 1020 | 86. 63890484 |
| F21A3. 5    | 1019 | 86. 55396474 |
| F52B5. 5    | 1019 | 86. 55396474 |
| H21P03. 2   | 1019 | 86. 55396474 |
| T19E7. 3    | 1018 | 86. 46902464 |
| F20A1. 9    | 1017 | 86. 38408454 |
| F31E3. 3    | 1017 | 86. 38408454 |
| R151. 5     | 1017 | 86. 38408454 |
| Y38C9A. 2   | 1017 | 86. 38408454 |
| T07A5. 2    | 1015 | 86. 21420433 |
| Y76A2B. 6   | 1015 | 86. 21420433 |
| F53C11. 4   | 1014 | 86. 12926423 |
| Y39H10A. 7  | 1013 | 86. 04432412 |
| B0432. 8    | 1012 | 85. 95938402 |
| F39B2. 10   | 1012 | 85. 95938402 |
| Y106G6H. 14 | 1012 | 85. 95938402 |
| K08H10. 7   | 1011 | 85. 87444392 |

|              |      |              |
|--------------|------|--------------|
| Y23H5A. 8    | 1011 | 85. 87444392 |
| C34D4. 4     | 1010 | 85. 78950382 |
| R06C1. 2     | 1010 | 85. 78950382 |
| K04C2. 2     | 1009 | 85. 70456371 |
| Y67H2A. 2    | 1009 | 85. 70456371 |
| C07G3. 9     | 1008 | 85. 61962361 |
| Y39A1A. 22   | 1008 | 85. 61962361 |
| Y71F9B. 2    | 1008 | 85. 61962361 |
| F45E4. 2     | 1007 | 85. 53468351 |
| T13C5. 6     | 1007 | 85. 53468351 |
| DC2. 8       | 1006 | 85. 4497434  |
| F48E8. 7     | 1006 | 85. 4497434  |
| T07A9. 1     | 1006 | 85. 4497434  |
| Y73B6BL. 33  | 1006 | 85. 4497434  |
| C02B10. 5    | 1004 | 85. 2798632  |
| Y47G6A. 4    | 1004 | 85. 2798632  |
| R05D11. 6    | 1003 | 85. 1949231  |
| C26F1. 3     | 1002 | 85. 10998299 |
| F55C5. 4     | 1002 | 85. 10998299 |
| Y47G6A. 19   | 1001 | 85. 02504289 |
| F08F8. 9     | 1000 | 84. 94010279 |
| F34D10. 2    | 1000 | 84. 94010279 |
| F38E1. 9     | 1000 | 84. 94010279 |
| Y47D3A. 4    | 1000 | 84. 94010279 |
| F30A10. 9    | 999  | 84. 85516268 |
| F26H9. 1     | 998  | 84. 77022258 |
| Y52B11A. 3   | 997  | 84. 68528248 |
| Y55F3BL. 2   | 997  | 84. 68528248 |
| Y71H2AM. 9   | 997  | 84. 68528248 |
| ZK632. 11    | 996  | 84. 60034238 |
| F16B12. 6    | 995  | 84. 51540227 |
| W09G10. 4    | 995  | 84. 51540227 |
| Y54F10AM. 10 | 995  | 84. 51540227 |
| F33D4. 4     | 994  | 84. 43046217 |
| ZK20. 3      | 993  | 84. 34552207 |
| B0250. 1     | 992  | 84. 26058197 |
| B0348. 6     | 992  | 84. 26058197 |
| W05B10. 2    | 992  | 84. 26058197 |
| Y116A8C. 32  | 991  | 84. 17564186 |
| Y43H11AL. 2  | 991  | 84. 17564186 |
| Y55F3AM. 12  | 991  | 84. 17564186 |
| 3R5. 1       | 990  | 84. 09070176 |
| Y54F10BM. 2  | 990  | 84. 09070176 |
| AC8. 7       | 989  | 84. 00576166 |
| C05D11. 7    | 988  | 83. 92082155 |
| C56C10. 13   | 988  | 83. 92082155 |
| Y39A1A. 5    | 988  | 83. 92082155 |
| Y57G11C. 33  | 988  | 83. 92082155 |
| Y71G12B. 1   | 988  | 83. 92082155 |
| Y75B8A. 30   | 988  | 83. 92082155 |
| C55C3. 5     | 987  | 83. 83588145 |
| F02E9. 1     | 987  | 83. 83588145 |
| T27A3. 2     | 987  | 83. 83588145 |
| Y38F2AL. 1   | 987  | 83. 83588145 |

|             |     |              |
|-------------|-----|--------------|
| Y73E7A. 6   | 987 | 83. 83588145 |
| F53F10. 5   | 986 | 83. 75094135 |
| K04G2. 5    | 986 | 83. 75094135 |
| T07A9. 2    | 986 | 83. 75094135 |
| T23F11. 1   | 986 | 83. 75094135 |
| ZK1058. 4   | 986 | 83. 75094135 |
| C23G10. 2   | 985 | 83. 66600125 |
| R11A8. 5    | 985 | 83. 66600125 |
| ZK524. 3    | 985 | 83. 66600125 |
| H43I07. 1   | 984 | 83. 58106114 |
| M106. 3     | 984 | 83. 58106114 |
| T20F7. 1    | 984 | 83. 58106114 |
| W08D2. 1    | 984 | 83. 58106114 |
| Y46G5A. 2   | 984 | 83. 58106114 |
| Y47D3A. 15  | 984 | 83. 58106114 |
| Y56A3A. 16  | 984 | 83. 58106114 |
| E02D9. 1    | 982 | 83. 41118094 |
| K07C11. 2   | 982 | 83. 41118094 |
| R05F9. 10   | 982 | 83. 41118094 |
| F44B9. 7    | 981 | 83. 32624083 |
| Y105E8A. 17 | 980 | 83. 24130073 |
| Y48A6C. 3   | 980 | 83. 24130073 |
| ZK858. 4    | 980 | 83. 24130073 |
| C29E4. 2    | 979 | 83. 15636063 |
| C42C1. 5    | 979 | 83. 15636063 |
| F02E9. 10   | 978 | 83. 07142053 |
| Y92H12BL. 5 | 978 | 83. 07142053 |
| C16C2. 3    | 977 | 82. 98648042 |
| Y57A10A. 10 | 977 | 82. 98648042 |
| C27A12. 9   | 976 | 82. 90154032 |
| F11A10. 7   | 975 | 82. 81660022 |
| F26E4. 9    | 975 | 82. 81660022 |
| F32H2. 1    | 974 | 82. 73166012 |
| R12E2. 1    | 974 | 82. 73166012 |
| C13B7. 6    | 973 | 82. 64672001 |
| K01C8. 7    | 973 | 82. 64672001 |
| B0547. 1    | 972 | 82. 56177991 |
| F48E8. 2    | 971 | 82. 47683981 |
| C15F1. 4    | 969 | 82. 3069596  |
| C33A12. 3   | 969 | 82. 3069596  |
| C36E8. 5    | 969 | 82. 3069596  |
| K07G5. 1    | 969 | 82. 3069596  |
| F25B4. 6    | 968 | 82. 2220195  |
| Y119D3B. 14 | 968 | 82. 2220195  |
| Y47D3A. 27  | 968 | 82. 2220195  |
| F45E12. 2   | 967 | 82. 1370794  |
| W03C9. 1    | 966 | 82. 05213929 |
| ZK1320. 9   | 966 | 82. 05213929 |
| Y73E7A. 3   | 964 | 81. 88225909 |
| C23G10. 7   | 963 | 81. 79731898 |
| C24A11. 8   | 963 | 81. 79731898 |
| ZK1058. 2   | 963 | 81. 79731898 |
| ZK686. 2    | 963 | 81. 79731898 |
| DY3. 1      | 962 | 81. 71237888 |

|             |     |              |
|-------------|-----|--------------|
| K01G5. 4    | 962 | 81. 71237888 |
| F36F12. 8   | 961 | 81. 62743878 |
| F59G1. 8    | 960 | 81. 54249868 |
| Y92H12BR. 7 | 960 | 81. 54249868 |
| T05A12. 3   | 959 | 81. 45755857 |
| M02B7. 2    | 958 | 81. 37261847 |
| Y49E10. 4   | 958 | 81. 37261847 |
| ZK1128. 5   | 957 | 81. 28767837 |
| B0035. 1    | 956 | 81. 20273827 |
| C05D11. 10  | 956 | 81. 20273827 |
| F01F1. 8    | 956 | 81. 20273827 |
| Y37E11AR. 2 | 956 | 81. 20273827 |
| Y50D7A. 4   | 956 | 81. 20273827 |
| C02F5. 9    | 955 | 81. 11779816 |
| T25G3. 1    | 953 | 80. 94791796 |
| B0280. 5    | 952 | 80. 86297785 |
| B0286. 4    | 952 | 80. 86297785 |
| R166. 4     | 952 | 80. 86297785 |
| T05G5. 8    | 952 | 80. 86297785 |
| Y41E3. 4    | 952 | 80. 86297785 |
| Y71A12B. 12 | 952 | 80. 86297785 |
| K08D10. 4   | 951 | 80. 77803775 |
| Y111B2A. 17 | 951 | 80. 77803775 |
| Y110A2AR. 3 | 950 | 80. 69309765 |
| ZK1128. 4   | 950 | 80. 69309765 |
| C26E6. 11   | 949 | 80. 60815755 |
| F48C1. 2    | 946 | 80. 35333724 |
| F59E10. 3   | 946 | 80. 35333724 |
| Y76B12C. 8  | 946 | 80. 35333724 |
| ZK632. 6    | 946 | 80. 35333724 |
| B0523. 3    | 945 | 80. 26839713 |
| F29A7. 6    | 945 | 80. 26839713 |
| F32A5. 6    | 944 | 80. 18345703 |
| T19B10. 7   | 944 | 80. 18345703 |
| F09F7. 4    | 943 | 80. 09851693 |
| F42A6. 5    | 943 | 80. 09851693 |
| H25P19. 1   | 943 | 80. 09851693 |
| F58D2. 4    | 941 | 79. 92863672 |
| W09C5. 1    | 941 | 79. 92863672 |
| Y37E11B. 5  | 940 | 79. 84369662 |
| C46F11. 3   | 939 | 79. 75875652 |
| F11A10. 6   | 939 | 79. 75875652 |
| F36H2. 2    | 939 | 79. 75875652 |
| T22C1. 10   | 939 | 79. 75875652 |
| F13A7. 14   | 938 | 79. 67381641 |
| R11A5. 1    | 938 | 79. 67381641 |
| T01C3. 6    | 938 | 79. 67381641 |
| Y50D4A. 1   | 938 | 79. 67381641 |
| K10B2. 1    | 937 | 79. 58887631 |
| C38D4. 1    | 935 | 79. 41899611 |
| F09D1. 1    | 935 | 79. 41899611 |
| F37C12. 7   | 935 | 79. 41899611 |
| T07C12. 12  | 935 | 79. 41899611 |
| Y42G9A. 1   | 935 | 79. 41899611 |



|             |     |              |
|-------------|-----|--------------|
| Y45F10A. 6  | 934 | 79. 334056   |
| Y48G10A. 4  | 934 | 79. 334056   |
| Y73B3A. 18  | 934 | 79. 334056   |
| C18E9. 2    | 932 | 79. 1641758  |
| R01B10. 1   | 932 | 79. 1641758  |
| T02C12. 3   | 932 | 79. 1641758  |
| Y48G1C. 5   | 932 | 79. 1641758  |
| Y57A10A. 20 | 931 | 79. 0792357  |
| B0284. 3    | 930 | 78. 99429559 |
| Y105E8B. 3  | 930 | 78. 99429559 |
| Y32F6A. 1   | 930 | 78. 99429559 |
| C08F8. 2    | 929 | 78. 90935549 |
| F25H5. 3    | 929 | 78. 90935549 |
| F42G8. 12   | 929 | 78. 90935549 |
| R11H6. 5    | 929 | 78. 90935549 |
| T10F2. 5    | 929 | 78. 90935549 |
| Y47D3A. 28  | 929 | 78. 90935549 |
| F58H7. 7    | 928 | 78. 82441539 |
| H11L12. 1   | 928 | 78. 82441539 |
| Y51H1A. 3   | 928 | 78. 82441539 |
| Y59E9AL. 7  | 928 | 78. 82441539 |
| Y110A7A. 15 | 927 | 78. 73947528 |
| C04C3. 5    | 926 | 78. 65453518 |
| F32B6. 9    | 926 | 78. 65453518 |
| F56H1. 4    | 926 | 78. 65453518 |
| F58G11. 5   | 926 | 78. 65453518 |
| C01F1. 2    | 925 | 78. 56959508 |
| F10B5. 6    | 925 | 78. 56959508 |
| R53. 6      | 925 | 78. 56959508 |
| Y40B1B. 6   | 925 | 78. 56959508 |
| W04C9. 4    | 923 | 78. 39971487 |
| Y116A8C. 42 | 923 | 78. 39971487 |
| F56D2. 2    | 922 | 78. 31477477 |
| K08E4. 1    | 922 | 78. 31477477 |
| Y105E8A. 23 | 922 | 78. 31477477 |
| B0281. 4    | 920 | 78. 14489456 |
| D2045. 1    | 920 | 78. 14489456 |
| K04F10. 6   | 920 | 78. 14489456 |
| R06F6. 9    | 920 | 78. 14489456 |
| R13A5. 8    | 919 | 78. 05995446 |
| C07G1. 5    | 917 | 77. 89007426 |
| F27C1. 6    | 916 | 77. 80513415 |
| T27F2. 1    | 916 | 77. 80513415 |
| C47C12. 4   | 915 | 77. 72019405 |
| F59B2. 3    | 915 | 77. 72019405 |
| Y71H2AM. 19 | 915 | 77. 72019405 |
| B0261. 1    | 914 | 77. 63525395 |
| C25H3. 11   | 914 | 77. 63525395 |
| F40F8. 1    | 914 | 77. 63525395 |
| Y41E3. 1    | 914 | 77. 63525395 |
| C44B12. 6   | 913 | 77. 55031385 |
| D2005. 3    | 913 | 77. 55031385 |
| F22D6. 6    | 913 | 77. 55031385 |
| W04B5. 4    | 913 | 77. 55031385 |

|             |     |              |
|-------------|-----|--------------|
| B0491. 1    | 912 | 77. 46537374 |
| R12E2. 13   | 912 | 77. 46537374 |
| Y55F3AM. 3  | 912 | 77. 46537374 |
| W01A8. 1    | 911 | 77. 38043364 |
| C09D4. 5    | 910 | 77. 29549354 |
| C09G9. 6    | 910 | 77. 29549354 |
| C50F4. 14   | 910 | 77. 29549354 |
| Y37E11C. 1  | 910 | 77. 29549354 |
| Y43F4B. 5   | 910 | 77. 29549354 |
| Y60A3A. 9   | 910 | 77. 29549354 |
| C53H9. 3    | 909 | 77. 21055343 |
| F29G9. 5    | 909 | 77. 21055343 |
| Y49F6B. 9   | 909 | 77. 21055343 |
| C08B11. 9   | 908 | 77. 12561333 |
| E02H1. 2    | 907 | 77. 04067323 |
| W06H3. 1    | 907 | 77. 04067323 |
| T12F5. 1    | 904 | 76. 78585292 |
| F33E2. 2    | 903 | 76. 70091282 |
| ZC308. 4    | 903 | 76. 70091282 |
| T07G12. 11  | 902 | 76. 61597271 |
| ZK809. 2    | 902 | 76. 61597271 |
| D2023. 4    | 901 | 76. 53103261 |
| Y43F8C. 6   | 900 | 76. 44609251 |
| F42H10. 7   | 899 | 76. 36115241 |
| C27A12. 8   | 898 | 76. 2762123  |
| M04F3. 1    | 898 | 76. 2762123  |
| ZK546. 1    | 898 | 76. 2762123  |
| C18E3. 7    | 897 | 76. 1912722  |
| Y71G12B. 12 | 897 | 76. 1912722  |
| D1007. 5    | 896 | 76. 1063321  |
| R05D7. 4    | 896 | 76. 1063321  |
| B0303. 4    | 895 | 76. 021392   |
| F08B4. 5    | 895 | 76. 021392   |
| F57C9. 1    | 895 | 76. 021392   |
| T27A3. 7    | 895 | 76. 021392   |
| Y48E1B. 13  | 893 | 75. 85151179 |
| C08C3. 4    | 891 | 75. 68163158 |
| C17H12. 13  | 891 | 75. 68163158 |
| C37A2. 2    | 891 | 75. 68163158 |
| C45B11. 1   | 891 | 75. 68163158 |
| F57B10. 7   | 891 | 75. 68163158 |
| W02B12. 11  | 891 | 75. 68163158 |
| K07F5. 14   | 890 | 75. 59669148 |
| R11H6. 2    | 890 | 75. 59669148 |
| Y66D12A. 21 | 889 | 75. 51175138 |
| ZK20. 5     | 889 | 75. 51175138 |
| F10E7. 5    | 888 | 75. 42681128 |
| H31G24. 4   | 888 | 75. 42681128 |
| H37N21. 1   | 887 | 75. 34187117 |
| F33D11. 8   | 886 | 75. 25693107 |
| C15C8. 4    | 885 | 75. 17199097 |
| VF39H2L. 1  | 885 | 75. 17199097 |
| Y39B6A. 33  | 884 | 75. 08705086 |
| B0464. 6    | 883 | 75. 00211076 |

|             |     |              |
|-------------|-----|--------------|
| E01G4. 4    | 883 | 75. 00211076 |
| R05D3. 12   | 882 | 74. 91717066 |
| T10A3. 1    | 881 | 74. 83223056 |
| Y54G2A. 2   | 881 | 74. 83223056 |
| K05C4. 7    | 880 | 74. 74729045 |
| Y79H2A. 6   | 880 | 74. 74729045 |
| F32H2. 3    | 879 | 74. 66235035 |
| M18. 8      | 879 | 74. 66235035 |
| PAR2. 4     | 879 | 74. 66235035 |
| Y48G1C. 6   | 879 | 74. 66235035 |
| C29E4. 8    | 878 | 74. 57741025 |
| C48A7. 2    | 878 | 74. 57741025 |
| T12D8. 2    | 878 | 74. 57741025 |
| T28F3. 1    | 878 | 74. 57741025 |
| Y116A8C. 35 | 878 | 74. 57741025 |
| F44G4. 1    | 877 | 74. 49247014 |
| W06B4. 3    | 876 | 74. 40753004 |
| Y54E10A. 6  | 876 | 74. 40753004 |
| Y55F3AM. 4  | 876 | 74. 40753004 |
| F25H2. 7    | 875 | 74. 32258994 |
| H15N14. 2   | 875 | 74. 32258994 |
| W03C9. 7    | 875 | 74. 32258994 |
| C37F5. 1    | 874 | 74. 23764984 |
| F07F6. 8    | 873 | 74. 15270973 |
| F13C5. 2    | 873 | 74. 15270973 |
| Y94H6A. 5   | 872 | 74. 06776963 |
| ZK652. 9    | 872 | 74. 06776963 |
| CC8. 2      | 871 | 73. 98282953 |
| F27D4. 2    | 871 | 73. 98282953 |
| K08D12. 3   | 871 | 73. 98282953 |
| DY3. 4      | 870 | 73. 89788943 |
| F21D5. 2    | 870 | 73. 89788943 |
| C25A1. 9    | 868 | 73. 72800922 |
| Y55F3BR. 1  | 868 | 73. 72800922 |
| D1046. 2    | 867 | 73. 64306912 |
| ZK40. 1     | 867 | 73. 64306912 |
| AC8. 12     | 866 | 73. 55812901 |
| K03E5. 1    | 866 | 73. 55812901 |
| W08F4. 9    | 865 | 73. 47318891 |
| Y42H9AR. 3  | 865 | 73. 47318891 |
| C12C8. 3    | 864 | 73. 38824881 |
| D2045. 9    | 864 | 73. 38824881 |
| W08F4. 7    | 864 | 73. 38824881 |
| F48A11. 1   | 863 | 73. 30330871 |
| F52F12. 3   | 863 | 73. 30330871 |
| Y74C9A. 3   | 863 | 73. 30330871 |
| F52C6. 4    | 862 | 73. 2183686  |
| F59C6. 4    | 862 | 73. 2183686  |
| F25B5. 5    | 861 | 73. 1334285  |
| F38A1. 8    | 861 | 73. 1334285  |
| R05F9. 6    | 861 | 73. 1334285  |
| F47B10. 1   | 860 | 73. 0484884  |
| T28D6. 4    | 860 | 73. 0484884  |
| Y57E12AL. 1 | 859 | 72. 96354829 |

|              |     |              |
|--------------|-----|--------------|
| Y71F9AL. 14  | 859 | 72. 96354829 |
| C02F5. 6     | 857 | 72. 79366809 |
| C16C8. 11    | 857 | 72. 79366809 |
| F56B3. 12    | 857 | 72. 79366809 |
| Y37E11B. 3   | 857 | 72. 79366809 |
| ZK177. 4     | 857 | 72. 79366809 |
| F07A11. 3    | 856 | 72. 70872799 |
| F37H8. 6     | 856 | 72. 70872799 |
| F46F11. 6    | 856 | 72. 70872799 |
| Y45G5AM. 7   | 856 | 72. 70872799 |
| Y92C3B. 2    | 856 | 72. 70872799 |
| D1037. 1     | 855 | 72. 62378788 |
| F56C9. 6     | 855 | 72. 62378788 |
| Y45F10D. 11  | 855 | 72. 62378788 |
| C07H6. 1     | 854 | 72. 53884778 |
| F31E3. 1     | 854 | 72. 53884778 |
| F32D8. 14    | 854 | 72. 53884778 |
| K05C4. 8     | 854 | 72. 53884778 |
| F58H1. 1     | 853 | 72. 45390768 |
| H21P03. 1    | 853 | 72. 45390768 |
| W01B6. 9     | 853 | 72. 45390768 |
| Y47D3A. 25   | 853 | 72. 45390768 |
| Y55F3BL. 1   | 853 | 72. 45390768 |
| C01H6. 6     | 852 | 72. 36896758 |
| F25H9. 5     | 852 | 72. 36896758 |
| F53G2. 7     | 852 | 72. 36896758 |
| W01A8. 4     | 852 | 72. 36896758 |
| ZC513. 5     | 852 | 72. 36896758 |
| H06H21. 6    | 851 | 72. 28402747 |
| R08C7. 10    | 851 | 72. 28402747 |
| C14A4. 11    | 850 | 72. 19908737 |
| C43E11. 7    | 849 | 72. 11414727 |
| T10H9. 3     | 849 | 72. 11414727 |
| C52E12. 1    | 848 | 72. 02920716 |
| Y18H1A. 4    | 848 | 72. 02920716 |
| Y62E10A. 10  | 848 | 72. 02920716 |
| Y43H11AL. 1  | 847 | 71. 94426706 |
| B0238. 10    | 846 | 71. 85932696 |
| Y110A2AL. 14 | 846 | 71. 85932696 |
| ZK1055. 7    | 846 | 71. 85932696 |
| F52B11. 2    | 845 | 71. 77438686 |
| B0361. 7     | 844 | 71. 68944675 |
| C55B7. 8     | 844 | 71. 68944675 |
| Y38A10A. 6   | 844 | 71. 68944675 |
| Y73B3A. 4    | 844 | 71. 68944675 |
| C05C8. 5     | 843 | 71. 60450665 |
| F26F4. 5     | 843 | 71. 60450665 |
| F45E4. 10    | 843 | 71. 60450665 |
| R13H4. 4     | 843 | 71. 60450665 |
| T12G3. 4     | 842 | 71. 51956655 |
| Y67D8C. 3    | 842 | 71. 51956655 |
| Y40B10A. 2   | 840 | 71. 34968634 |
| C01G6. 6     | 839 | 71. 26474624 |
| Y105E8A. 24  | 839 | 71. 26474624 |

|             |     |              |
|-------------|-----|--------------|
| Y75B8A. 14  | 839 | 71. 26474624 |
| ZC15. 10    | 839 | 71. 26474624 |
| F42A10. 1   | 838 | 71. 17980614 |
| Y59A8B. 11  | 838 | 71. 17980614 |
| C01F6. 8    | 837 | 71. 09486603 |
| C35D10. 9   | 837 | 71. 09486603 |
| Y73B6BL. 30 | 837 | 71. 09486603 |
| F35H8. 3    | 836 | 71. 00992593 |
| K07E8. 7    | 835 | 70. 92498583 |
| R11E3. 6    | 834 | 70. 84004573 |
| T27E9. 7    | 834 | 70. 84004573 |
| Y51F10. 4   | 834 | 70. 84004573 |
| C09G4. 5    | 833 | 70. 75510562 |
| M106. 5     | 833 | 70. 75510562 |
| F21H12. 1   | 832 | 70. 67016552 |
| M01D7. 2    | 832 | 70. 67016552 |
| T01E8. 4    | 832 | 70. 67016552 |
| F55H2. 5    | 831 | 70. 58522542 |
| K02F6. 1    | 831 | 70. 58522542 |
| Y54E5A. 5   | 831 | 70. 58522542 |
| Y54F10AM. 4 | 831 | 70. 58522542 |
| Y54E10BR. 2 | 830 | 70. 50028531 |
| F22B7. 5    | 829 | 70. 41534521 |
| F52B5. 6    | 828 | 70. 33040511 |
| M03A1. 1    | 828 | 70. 33040511 |
| Y45F10C. 6  | 828 | 70. 33040511 |
| F35D11. 4   | 827 | 70. 24546501 |
| F25D7. 2    | 826 | 70. 1605249  |
| R06A10. 2   | 826 | 70. 1605249  |
| T03F1. 3    | 826 | 70. 1605249  |
| W05F2. 6    | 826 | 70. 1605249  |
| Y110A7A. 10 | 826 | 70. 1605249  |
| Y48B6A. 12  | 826 | 70. 1605249  |
| Y55F3AM. 13 | 825 | 70. 0755848  |
| Y45F3A. 2   | 824 | 69. 9906447  |
| Y69A2AR. 6  | 824 | 69. 9906447  |
| C26E6. 8    | 823 | 69. 90570459 |
| F49D11. 8   | 823 | 69. 90570459 |
| H17B01. 4   | 823 | 69. 90570459 |
| F47G6. 4    | 822 | 69. 82076449 |
| F59A3. 12   | 822 | 69. 82076449 |
| F56D12. 1   | 821 | 69. 73582439 |
| T11G6. 2    | 821 | 69. 73582439 |
| F25B4. 4    | 820 | 69. 65088429 |
| ZK546. 14   | 820 | 69. 65088429 |
| F26E4. 11   | 819 | 69. 56594418 |
| F56D12. 4   | 819 | 69. 56594418 |
| T07A9. 5    | 819 | 69. 56594418 |
| Y48E1B. 3   | 819 | 69. 56594418 |
| C01G8. 1    | 818 | 69. 48100408 |
| C56C10. 7   | 817 | 69. 39606398 |
| F19B10. 5   | 817 | 69. 39606398 |
| F42G8. 3    | 817 | 69. 39606398 |
| D2013. 9    | 815 | 69. 22618377 |

|             |     |              |
|-------------|-----|--------------|
| F32D8. 5    | 815 | 69. 22618377 |
| Y47G6A. 18  | 815 | 69. 22618377 |
| Y63D3A. 6   | 815 | 69. 22618377 |
| Y71G12B. 10 | 815 | 69. 22618377 |
| Y87G2A. 4   | 815 | 69. 22618377 |
| C23G10. 3   | 814 | 69. 14124367 |
| C35B1. 2    | 814 | 69. 14124367 |
| C07G1. 8    | 813 | 69. 05630357 |
| F10C2. 2    | 813 | 69. 05630357 |
| F54H12. 6   | 813 | 69. 05630357 |
| R04E5. 8    | 813 | 69. 05630357 |
| Y65B4A. 1   | 813 | 69. 05630357 |
| B0334. 11   | 812 | 68. 97136346 |
| R08D7. 4    | 812 | 68. 97136346 |
| C30B5. 1    | 811 | 68. 88642336 |
| T24C4. 5    | 811 | 68. 88642336 |
| Y45G12B. 1  | 810 | 68. 80148326 |
| Y56A3A. 28  | 810 | 68. 80148326 |
| C53A5. 6    | 809 | 68. 71654316 |
| W04A8. 1    | 809 | 68. 71654316 |
| ZK1307. 8   | 809 | 68. 71654316 |
| C17G10. 2   | 808 | 68. 63160305 |
| R10E8. 6    | 808 | 68. 63160305 |
| F52A8. 5    | 807 | 68. 54666295 |
| F10E7. 6    | 806 | 68. 46172285 |
| K08E7. 1    | 805 | 68. 37678274 |
| C18D11. 4   | 804 | 68. 29184264 |
| W05F2. 2    | 804 | 68. 29184264 |
| C25A1. 12   | 803 | 68. 20690254 |
| F01G4. 3    | 803 | 68. 20690254 |
| T19C3. 8    | 803 | 68. 20690254 |
| Y43F8C. 7   | 803 | 68. 20690254 |
| C16A3. 2    | 802 | 68. 12196244 |
| F28B3. 1    | 802 | 68. 12196244 |
| ZK945. 2    | 802 | 68. 12196244 |
| F27C1. 2    | 801 | 68. 03702233 |
| F54D5. 9    | 801 | 68. 03702233 |
| K06A5. 8    | 801 | 68. 03702233 |
| W08E12. 7   | 801 | 68. 03702233 |
| Y39E4B. 10  | 801 | 68. 03702233 |
| ZK856. 1    | 801 | 68. 03702233 |
| C34C12. 4   | 800 | 67. 95208223 |
| F23F1. 9    | 800 | 67. 95208223 |
| Y39A1A. 6   | 800 | 67. 95208223 |
| Y74C9A. 1   | 800 | 67. 95208223 |
| C33H5. 9    | 799 | 67. 86714213 |
| K04C2. 4    | 799 | 67. 86714213 |
| R13A5. 1    | 798 | 67. 78220202 |
| C32A3. 2    | 797 | 67. 69726192 |
| R144. 11    | 797 | 67. 69726192 |
| C41D11. 2   | 796 | 67. 61232182 |
| F45D3. 5    | 796 | 67. 61232182 |
| F55D10. 3   | 796 | 67. 61232182 |
| M01B12. 5   | 795 | 67. 52738172 |

|             |     |              |
|-------------|-----|--------------|
| Y69A2AR. 18 | 795 | 67. 52738172 |
| C48B6. 2    | 794 | 67. 44244161 |
| DC2. 3      | 794 | 67. 44244161 |
| Y51H1A. 6   | 794 | 67. 44244161 |
| Y54E10A. 2  | 794 | 67. 44244161 |
| H06001. 2   | 793 | 67. 35750151 |
| T10D4. 6    | 793 | 67. 35750151 |
| F57A8. 2    | 792 | 67. 27256141 |
| H06I04. 4   | 792 | 67. 27256141 |
| Y37H9A. 1   | 792 | 67. 27256141 |
| C34B2. 8    | 791 | 67. 18762131 |
| T09A5. 15   | 791 | 67. 18762131 |
| Y71A12B. 1  | 791 | 67. 18762131 |
| Y38F2AR. 3  | 790 | 67. 1026812  |
| B0511. 7    | 789 | 67. 0177411  |
| C35D10. 5   | 789 | 67. 0177411  |
| F55F8. 6    | 789 | 67. 0177411  |
| K04G7. 1    | 789 | 67. 0177411  |
| K08A2. 1    | 789 | 67. 0177411  |
| R10H10. 1   | 789 | 67. 0177411  |
| T05H4. 6    | 789 | 67. 0177411  |
| T23D8. 5    | 788 | 66. 932801   |
| W04D2. 6    | 787 | 66. 84786089 |
| Y51H4A. 15  | 787 | 66. 84786089 |
| C24B5. 2    | 786 | 66. 76292079 |
| R144. 6     | 786 | 66. 76292079 |
| C17E4. 10   | 785 | 66. 67798069 |
| D2092. 5    | 785 | 66. 67798069 |
| W06D4. 4    | 785 | 66. 67798069 |
| F26B1. 3    | 784 | 66. 59304059 |
| F46B6. 7    | 784 | 66. 59304059 |
| T04A8. 15   | 784 | 66. 59304059 |
| C27C7. 1    | 783 | 66. 50810048 |
| C27D11. 1   | 783 | 66. 50810048 |
| C09E7. 7    | 781 | 66. 33822028 |
| F31C3. 4    | 780 | 66. 25328017 |
| T26A5. 2    | 779 | 66. 16834007 |
| R144. 3     | 778 | 66. 08339997 |
| T28D9. 10   | 778 | 66. 08339997 |
| C16C10. 6   | 777 | 65. 99845987 |
| C25A1. 7    | 775 | 65. 82857966 |
| C30H6. 8    | 775 | 65. 82857966 |
| F46F11. 10  | 775 | 65. 82857966 |
| F55G1. 9    | 775 | 65. 82857966 |
| W02D3. 9    | 775 | 65. 82857966 |
| Y38C1AA. 14 | 775 | 65. 82857966 |
| ZK418. 4    | 775 | 65. 82857966 |
| Y54F10BM. 1 | 774 | 65. 74363956 |
| C09E7. 8    | 773 | 65. 65869945 |
| C44B9. 1    | 773 | 65. 65869945 |
| F26F4. 11   | 773 | 65. 65869945 |
| F37C12. 11  | 773 | 65. 65869945 |
| R07E5. 10   | 773 | 65. 65869945 |
| Y19D10A. 12 | 773 | 65. 65869945 |

|             |     |              |
|-------------|-----|--------------|
| C25H3. 4    | 772 | 65. 57375935 |
| F20D12. 4   | 772 | 65. 57375935 |
| F42G8. 4    | 771 | 65. 48881925 |
| K07C11. 9   | 771 | 65. 48881925 |
| Y39A3CR. 1  | 771 | 65. 48881925 |
| Y39H10A. 3  | 771 | 65. 48881925 |
| Y75B7AL. 3  | 771 | 65. 48881925 |
| F41G3. 12   | 770 | 65. 40387915 |
| T21C9. 1    | 770 | 65. 40387915 |
| Y53G8AL. 2  | 770 | 65. 40387915 |
| Y53G8AR. 2  | 770 | 65. 40387915 |
| Y71G12B. 35 | 770 | 65. 40387915 |
| T05H4. 13   | 769 | 65. 31893904 |
| Y73B6BL. 3  | 769 | 65. 31893904 |
| ZK856. 8    | 769 | 65. 31893904 |
| B0495. 8    | 768 | 65. 23399894 |
| F43C1. 2    | 768 | 65. 23399894 |
| T27F6. 6    | 768 | 65. 23399894 |
| B0303. 3    | 766 | 65. 06411874 |
| F40F11. 1   | 766 | 65. 06411874 |
| F59H6. 9    | 766 | 65. 06411874 |
| T19B4. 5    | 766 | 65. 06411874 |
| F33D4. 5    | 765 | 64. 97917863 |
| T06D8. 9    | 765 | 64. 97917863 |
| Y39A1A. 12  | 765 | 64. 97917863 |
| F56A6. 4    | 763 | 64. 80929843 |
| F56H1. 5    | 763 | 64. 80929843 |
| K11H12. 8   | 762 | 64. 72435832 |
| VC5. 4      | 762 | 64. 72435832 |
| Y57A10A. 5  | 762 | 64. 72435832 |
| R155. 1     | 761 | 64. 63941822 |
| F07B7. 2    | 760 | 64. 55447812 |
| Y23H5B. 5   | 760 | 64. 55447812 |
| Y82E9BR. 22 | 760 | 64. 55447812 |
| C41G7. 9    | 759 | 64. 46953802 |
| T16G12. 6   | 759 | 64. 46953802 |
| Y53C12A. 4  | 759 | 64. 46953802 |
| Y32H12A. 7  | 758 | 64. 38459791 |
| Y46G5A. 17  | 757 | 64. 29965781 |
| Y94H6A. 9   | 756 | 64. 21471771 |
| C05D2. 10   | 755 | 64. 1297776  |
| Y18H1A. 6   | 755 | 64. 1297776  |
| Y87G2A. 6   | 755 | 64. 1297776  |
| C15C8. 7    | 754 | 64. 0448375  |
| F40F8. 11   | 754 | 64. 0448375  |
| ZC155. 7    | 754 | 64. 0448375  |
| C24F3. 4    | 753 | 63. 9598974  |
| W01G7. 3    | 753 | 63. 9598974  |
| Y56A3A. 36  | 753 | 63. 9598974  |
| C27H6. 3    | 752 | 63. 8749573  |
| K08F4. 1    | 752 | 63. 8749573  |
| T28F4. 1    | 752 | 63. 8749573  |
| C01B4. 7    | 751 | 63. 79001719 |
| C38D9. 2    | 751 | 63. 79001719 |



|             |     |              |
|-------------|-----|--------------|
| F53F4. 16   | 751 | 63. 79001719 |
| T03F1. 8    | 751 | 63. 79001719 |
| T26G10. 1   | 751 | 63. 79001719 |
| Y59A8B. 22  | 751 | 63. 79001719 |
| K04B12. 2   | 750 | 63. 70507709 |
| K04G2. 3    | 750 | 63. 70507709 |
| M01F1. 6    | 750 | 63. 70507709 |
| T24D1. 1    | 750 | 63. 70507709 |
| ZK858. 6    | 750 | 63. 70507709 |
| C02F5. 4    | 749 | 63. 62013699 |
| C08F11. 7   | 749 | 63. 62013699 |
| F19F10. 9   | 749 | 63. 62013699 |
| F59E10. 1   | 749 | 63. 62013699 |
| Y39F10B. 1  | 749 | 63. 62013699 |
| Y41D4B. 5   | 749 | 63. 62013699 |
| Y66D12A. 5  | 749 | 63. 62013699 |
| B0564. 1    | 748 | 63. 53519689 |
| R107. 7     | 748 | 63. 53519689 |
| W06A11. 4   | 748 | 63. 53519689 |
| F09E5. 7    | 747 | 63. 45025678 |
| F23A7. 8    | 747 | 63. 45025678 |
| K08E3. 5    | 747 | 63. 45025678 |
| C16C10. 10  | 746 | 63. 36531668 |
| R06C7. 7    | 746 | 63. 36531668 |
| R07H5. 9    | 746 | 63. 36531668 |
| Y54G2A. 22  | 746 | 63. 36531668 |
| ZK430. 7    | 746 | 63. 36531668 |
| C46A5. 6    | 745 | 63. 28037658 |
| Y92H12BL. 4 | 745 | 63. 28037658 |
| B0041. 4    | 744 | 63. 19543647 |
| D2096. 4    | 744 | 63. 19543647 |
| Y74C9A. 4   | 744 | 63. 19543647 |
| C14B9. 10   | 743 | 63. 11049637 |
| F18E2. 2    | 743 | 63. 11049637 |
| Y80D3A. 1   | 743 | 63. 11049637 |
| C33F10. 14  | 742 | 63. 02555627 |
| M18. 6      | 742 | 63. 02555627 |
| C56A3. 4    | 741 | 62. 94061617 |
| K11D2. 3    | 741 | 62. 94061617 |
| T01H3. 1    | 741 | 62. 94061617 |
| Y73B6BL. 7  | 741 | 62. 94061617 |
| B0361. 2    | 740 | 62. 85567606 |
| F01F1. 3    | 740 | 62. 85567606 |
| C06A6. 3    | 739 | 62. 77073596 |
| F53A2. 7    | 739 | 62. 77073596 |
| F56B3. 2    | 738 | 62. 68579586 |
| R17. 1      | 738 | 62. 68579586 |
| Y108G3AL. 1 | 738 | 62. 68579586 |
| Y65B4A. 6   | 737 | 62. 60085575 |
| M04B2. 4    | 736 | 62. 51591565 |
| T01H3. 3    | 736 | 62. 51591565 |
| Y71A12B. 11 | 736 | 62. 51591565 |
| C43G2. 1    | 735 | 62. 43097555 |
| E02H1. 4    | 735 | 62. 43097555 |

|             |     |              |
|-------------|-----|--------------|
| K08F11. 4   | 735 | 62. 43097555 |
| H14E04. 2   | 734 | 62. 34603545 |
| Y44E3A. 4   | 734 | 62. 34603545 |
| ZK1010. 4   | 733 | 62. 26109534 |
| C41H7. 4    | 732 | 62. 17615524 |
| D2024. 5    | 732 | 62. 17615524 |
| C47E12. 7   | 731 | 62. 09121514 |
| Y48G1C. 4   | 731 | 62. 09121514 |
| F08F8. 4    | 730 | 62. 00627504 |
| F33G12. 3   | 730 | 62. 00627504 |
| R148. 1     | 730 | 62. 00627504 |
| Y47D7A. 14  | 730 | 62. 00627504 |
| F13B12. 1   | 729 | 61. 92133493 |
| C06H2. 1    | 728 | 61. 83639483 |
| F14B4. 2    | 728 | 61. 83639483 |
| F22D6. 8    | 728 | 61. 83639483 |
| ZK185. 2    | 728 | 61. 83639483 |
| K02F3. 12   | 727 | 61. 75145473 |
| T14G10. 7   | 727 | 61. 75145473 |
| W03B1. 4    | 726 | 61. 66651462 |
| C47G2. 3    | 725 | 61. 58157452 |
| D2024. 6    | 725 | 61. 58157452 |
| R74. 1      | 725 | 61. 58157452 |
| F18C5. 2    | 724 | 61. 49663442 |
| F26E4. 10   | 724 | 61. 49663442 |
| F39H11. 3   | 723 | 61. 41169432 |
| K02F2. 1    | 723 | 61. 41169432 |
| M70. 5      | 723 | 61. 41169432 |
| T03F6. 3    | 723 | 61. 41169432 |
| Y18D10A. 5  | 723 | 61. 41169432 |
| Y71F9AM. 4  | 723 | 61. 41169432 |
| Y81B9A. 1   | 722 | 61. 32675421 |
| Y54G9A. 6   | 721 | 61. 24181411 |
| Y59A8A. 1   | 721 | 61. 24181411 |
| C28C12. 9   | 720 | 61. 15687401 |
| D2013. 7    | 720 | 61. 15687401 |
| Y39A1A. 14  | 720 | 61. 15687401 |
| T20H12. 1   | 719 | 61. 07193339 |
| Y39A3CL. 2  | 719 | 61. 07193339 |
| Y57A10A. 2  | 719 | 61. 07193339 |
| F18E2. 4    | 718 | 60. 9869938  |
| H27M09. 1   | 718 | 60. 9869938  |
| T19B10. 4   | 718 | 60. 9869938  |
| R02D3. 4    | 717 | 60. 9020537  |
| R10E4. 11   | 717 | 60. 9020537  |
| Y40B10A. 1  | 716 | 60. 8171136  |
| C02B8. 1    | 715 | 60. 73217349 |
| F09E5. 3    | 715 | 60. 73217349 |
| T13H2. 5    | 715 | 60. 73217349 |
| Y59A8B. 21  | 715 | 60. 73217349 |
| Y94H6A. 11  | 715 | 60. 73217349 |
| B0336. 2    | 714 | 60. 64723339 |
| F44F4. 3    | 714 | 60. 64723339 |
| Y110A7A. 16 | 714 | 60. 64723339 |

|            |     |              |
|------------|-----|--------------|
| ZC434. 7   | 714 | 60. 64723339 |
| C44B7. 12  | 713 | 60. 56229329 |
| Y6D11A. 1  | 713 | 60. 56229329 |
| F01F1. 15  | 712 | 60. 47735318 |
| F36H1. 6   | 712 | 60. 47735318 |
| F55H2. 7   | 712 | 60. 47735318 |
| T26C12. 1  | 712 | 60. 47735318 |
| Y37H2A. 7  | 712 | 60. 47735318 |
| C33H5. 19  | 711 | 60. 39241308 |
| Y73B3A. 13 | 711 | 60. 39241308 |
| W02A11. 5  | 710 | 60. 30747298 |
| Y42H9AR. 4 | 710 | 60. 30747298 |
| C14C10. 3  | 709 | 60. 22253288 |
| K11H12. 1  | 709 | 60. 22253288 |
| R05H10. 3  | 709 | 60. 22253288 |
| Y106G6D. 7 | 709 | 60. 22253288 |
| Y45G5AL. 1 | 709 | 60. 22253288 |
| Y48E1B. 7  | 709 | 60. 22253288 |
| M176. 2    | 708 | 60. 13759277 |
| R05G6. 4   | 708 | 60. 13759277 |
| F54C9. 1   | 707 | 60. 05265267 |
| F42G8. 6   | 706 | 59. 96771257 |
| Y32H12A. 8 | 706 | 59. 96771257 |
| Y34D9A. 8  | 706 | 59. 96771257 |
| K10F12. 6  | 705 | 59. 88277247 |
| F32H2. 4   | 704 | 59. 79783236 |
| Y43F8C. 14 | 704 | 59. 79783236 |
| C03E10. 4  | 703 | 59. 71289226 |
| R01H10. 1  | 703 | 59. 71289226 |
| T16A1. 8   | 703 | 59. 71289226 |
| Y6B3B. 9   | 703 | 59. 71289226 |
| ZK742. 6   | 703 | 59. 71289226 |
| F52C9. 7   | 702 | 59. 62795216 |
| K04D7. 2   | 702 | 59. 62795216 |
| W07A8. 3   | 702 | 59. 62795216 |
| C16A11. 6  | 701 | 59. 54301205 |
| F54C9. 5   | 700 | 59. 45807195 |
| Y47H9C. 4  | 700 | 59. 45807195 |
| F36D4. 5   | 699 | 59. 37313185 |
| R09B3. 4   | 699 | 59. 37313185 |
| T10B11. 8  | 699 | 59. 37313185 |
| C17E4. 9   | 698 | 59. 28819175 |
| C36E8. 3   | 698 | 59. 28819175 |
| W09H1. 6   | 698 | 59. 28819175 |
| C25A1. 8   | 697 | 59. 20325164 |
| W06H8. 1   | 697 | 59. 20325164 |
| W09C3. 4   | 697 | 59. 20325164 |
| Y62E10A. 5 | 697 | 59. 20325164 |
| ZK524. 4   | 697 | 59. 20325164 |
| R10E4. 4   | 696 | 59. 11831154 |
| C06A1. 5   | 695 | 59. 03337144 |
| VF11C1L. 1 | 695 | 59. 03337144 |
| Y53C12B. 2 | 695 | 59. 03337144 |
| Y54G11A. 2 | 695 | 59. 03337144 |

|             |     |              |
|-------------|-----|--------------|
| Y54G9A. 7   | 695 | 59. 03337144 |
| Y97E10AR. 3 | 695 | 59. 03337144 |
| C32F10. 8   | 694 | 58. 94843133 |
| C36B1. 5    | 694 | 58. 94843133 |
| C53A5. 17   | 694 | 58. 94843133 |
| F58H7. 5    | 694 | 58. 94843133 |
| W02D9. 1    | 694 | 58. 94843133 |
| T26G10. 4   | 693 | 58. 86349123 |
| W06E11. 4   | 693 | 58. 86349123 |
| F13H8. 10   | 692 | 58. 77855113 |
| C25G4. 4    | 691 | 58. 69361103 |
| Y82E9BR. 14 | 691 | 58. 69361103 |
| T28F12. 3   | 690 | 58. 60867092 |
| F10G8. 3    | 689 | 58. 52373082 |
| T07A9. 10   | 689 | 58. 52373082 |
| Y73B6BL. 19 | 689 | 58. 52373082 |
| B0024. 13   | 688 | 58. 43879072 |
| Y24F12A. 1  | 688 | 58. 43879072 |
| Y57G11C. 3  | 687 | 58. 35385062 |
| F26E4. 4    | 686 | 58. 26891051 |
| K08D9. 3    | 686 | 58. 26891051 |
| T11G6. 1    | 686 | 58. 26891051 |
| W03A5. 6    | 686 | 58. 26891051 |
| ZK632. 9    | 686 | 58. 26891051 |
| T07G12. 6   | 685 | 58. 18397041 |
| W09B7. 1    | 685 | 58. 18397041 |
| M02B7. 4    | 684 | 58. 09903031 |
| Y51H4A. 3   | 684 | 58. 09903031 |
| Y54E10A. 3  | 684 | 58. 09903031 |
| C27A12. 6   | 682 | 57. 9291501  |
| C30A5. 3    | 682 | 57. 9291501  |
| F14F11. 1   | 682 | 57. 9291501  |
| K08E3. 4    | 682 | 57. 9291501  |
| K11H3. 8    | 682 | 57. 9291501  |
| W01G7. 4    | 682 | 57. 9291501  |
| C06A6. 4    | 681 | 57. 84421    |
| C24H11. 6   | 681 | 57. 84421    |
| K03D10. 3   | 681 | 57. 84421    |
| K03E5. 3    | 681 | 57. 84421    |
| R10E12. 1   | 681 | 57. 84421    |
| ZK1127. 13  | 681 | 57. 84421    |
| ZK809. 5    | 681 | 57. 84421    |
| F40F9. 7    | 680 | 57. 7592699  |
| M03F8. 3    | 679 | 57. 67432979 |
| Y50D4A. 4   | 679 | 57. 67432979 |
| C10C6. 5    | 678 | 57. 58938969 |
| F56D12. 6   | 678 | 57. 58938969 |
| B0348. 4    | 677 | 57. 50444959 |
| F59A3. 6    | 677 | 57. 50444959 |
| Y50D4C. 4   | 677 | 57. 50444959 |
| F23F1. 5    | 676 | 57. 41950948 |
| F46F11. 1   | 676 | 57. 41950948 |
| F57B9. 1    | 676 | 57. 41950948 |
| C16C10. 5   | 675 | 57. 33456938 |

|             |     |              |
|-------------|-----|--------------|
| C41C4. 7    | 675 | 57. 33456938 |
| Y67D2. 1    | 675 | 57. 33456938 |
| B0205. 6    | 674 | 57. 24962928 |
| R10E11. 2   | 673 | 57. 16468918 |
| R186. 7     | 673 | 57. 16468918 |
| Y39E4B. 5   | 673 | 57. 16468918 |
| C15C6. 3    | 672 | 57. 07974907 |
| R03D7. 2    | 672 | 57. 07974907 |
| C56G2. 1    | 671 | 56. 99480897 |
| R05D3. 3    | 671 | 56. 99480897 |
| T27F6. 8    | 671 | 56. 99480897 |
| ZC518. 3    | 671 | 56. 99480897 |
| ZK1098. 7   | 671 | 56. 99480897 |
| C14A4. 1    | 670 | 56. 90986887 |
| C14B1. 9    | 670 | 56. 90986887 |
| K01G5. 1    | 670 | 56. 90986887 |
| T26E3. 4    | 670 | 56. 90986887 |
| F47D12. 9   | 669 | 56. 82492877 |
| F59H6. 11   | 669 | 56. 82492877 |
| Y105E8A. 1  | 669 | 56. 82492877 |
| Y39B6A. 14  | 669 | 56. 82492877 |
| F57B10. 5   | 668 | 56. 73998866 |
| ZK370. 5    | 668 | 56. 73998866 |
| F58D5. 4    | 667 | 56. 65504856 |
| Y10G11A. 1  | 667 | 56. 65504856 |
| F09E5. 1    | 666 | 56. 57010846 |
| Y52B11A. 9  | 666 | 56. 57010846 |
| C43E11. 8   | 665 | 56. 48516835 |
| W02B12. 13  | 665 | 56. 48516835 |
| W06H3. 3    | 665 | 56. 48516835 |
| H19N07. 4   | 664 | 56. 40022825 |
| Y48C3A. 17  | 664 | 56. 40022825 |
| ZK688. 9    | 664 | 56. 40022825 |
| K04G2. 2    | 663 | 56. 31528815 |
| C15H11. 7   | 662 | 56. 23034805 |
| F31D4. 1    | 662 | 56. 23034805 |
| T26C11. 7   | 662 | 56. 23034805 |
| B0035. 8    | 661 | 56. 14540794 |
| M03A1. 6    | 661 | 56. 14540794 |
| T16G12. 3   | 661 | 56. 14540794 |
| T21B10. 5   | 661 | 56. 14540794 |
| W02D7. 7    | 661 | 56. 14540794 |
| Y102A5C. 4  | 661 | 56. 14540794 |
| Y71F9AL. 10 | 661 | 56. 14540794 |
| C09G12. 8   | 660 | 56. 06046784 |
| K07B1. 5    | 660 | 56. 06046784 |
| W10D9. 4    | 660 | 56. 06046784 |
| D1046. 1    | 659 | 55. 97552774 |
| K07B1. 6    | 659 | 55. 97552774 |
| Y18D10A. 11 | 659 | 55. 97552774 |
| Y50D7A. 1   | 659 | 55. 97552774 |
| B0001. 4    | 658 | 55. 89058763 |
| C44C10. 5   | 658 | 55. 89058763 |
| F25H2. 5    | 658 | 55. 89058763 |

|             |     |              |
|-------------|-----|--------------|
| H37A05. 4   | 658 | 55. 89058763 |
| F10E9. 2    | 657 | 55. 80564753 |
| W02A11. 4   | 657 | 55. 80564753 |
| Y67D2. 3    | 657 | 55. 80564753 |
| M01D7. 6    | 656 | 55. 72070743 |
| Y69A2AR. 1  | 656 | 55. 72070743 |
| Y95B8A. 4   | 656 | 55. 72070743 |
| F40D4. 13   | 655 | 55. 63576733 |
| C15H11. 8   | 654 | 55. 55082722 |
| F59E12. 15  | 654 | 55. 55082722 |
| Y71G12B. 24 | 654 | 55. 55082722 |
| W08E3. 3    | 653 | 55. 46588712 |
| Y17G7B. 2   | 653 | 55. 46588712 |
| Y87G2A. 8   | 653 | 55. 46588712 |
| C34C12. 5   | 652 | 55. 38094702 |
| C35D10. 10  | 652 | 55. 38094702 |
| Y54G2A. 18  | 652 | 55. 38094702 |
| Y5F2A. 4    | 652 | 55. 38094702 |
| T28F4. 4    | 651 | 55. 29600691 |
| W08G11. 4   | 651 | 55. 29600691 |
| Y54G2A. 29  | 651 | 55. 29600691 |
| Y65B4A. 8   | 651 | 55. 29600691 |
| Y6D11A. 2   | 651 | 55. 29600691 |
| W03A5. 4    | 650 | 55. 21106681 |
| Y37D8A. 14  | 650 | 55. 21106681 |
| Y47G6A. 1   | 650 | 55. 21106681 |
| F49E8. 5    | 649 | 55. 12612671 |
| ZK418. 8    | 649 | 55. 12612671 |
| C01H6. 7    | 648 | 55. 04118661 |
| C15H11. 9   | 648 | 55. 04118661 |
| F54F2. 5    | 648 | 55. 04118661 |
| C34C6. 2    | 647 | 54. 9562465  |
| T09A5. 9    | 647 | 54. 9562465  |
| T23G7. 5    | 647 | 54. 9562465  |
| Y87G2A. 18  | 647 | 54. 9562465  |
| C28A5. 6    | 646 | 54. 8713064  |
| C35D10. 16  | 646 | 54. 8713064  |
| F32A11. 1   | 646 | 54. 8713064  |
| Y22D7AL. 7  | 645 | 54. 7863663  |
| Y92H12BM. 1 | 645 | 54. 7863663  |
| T01B11. 3   | 644 | 54. 7014262  |
| ZK512. 4    | 644 | 54. 7014262  |
| C56C10. 9   | 643 | 54. 61648609 |
| D2023. 6    | 643 | 54. 61648609 |
| T04A8. 7    | 643 | 54. 61648609 |
| T21B10. 1   | 643 | 54. 61648609 |
| Y38A10A. 7  | 643 | 54. 61648609 |
| Y55H10A. 1  | 643 | 54. 61648609 |
| Y71F9B. 13  | 643 | 54. 61648609 |
| R07E5. 8    | 642 | 54. 53154599 |
| W09D10. 3   | 642 | 54. 53154599 |
| Y110A7A. 14 | 642 | 54. 53154599 |
| F18A11. 5   | 641 | 54. 44660589 |
| C28D4. 3    | 640 | 54. 36166578 |

|             |     |              |
|-------------|-----|--------------|
| C32E8. 7    | 640 | 54. 36166578 |
| Y17G9B. 5   | 640 | 54. 36166578 |
| Y53H1C. 1   | 640 | 54. 36166578 |
| ZK637. 2    | 640 | 54. 36166578 |
| ZK792. 6    | 640 | 54. 36166578 |
| C45G9. 2    | 639 | 54. 27672568 |
| F21H11. 2   | 639 | 54. 27672568 |
| F45H11. 2   | 639 | 54. 27672568 |
| W08F4. 12   | 639 | 54. 27672568 |
| ZK353. 6    | 639 | 54. 27672568 |
| F56H9. 4    | 638 | 54. 19178558 |
| K12H4. 5    | 637 | 54. 10684548 |
| Y37E11AL. 3 | 637 | 54. 10684548 |
| Y92H12BR. 6 | 637 | 54. 10684548 |
| Y71F9AL. 13 | 636 | 54. 02190537 |
| C33H5. 18   | 635 | 53. 93696527 |
| F07B7. 1    | 635 | 53. 93696527 |
| Y82E9BR. 3  | 635 | 53. 93696527 |
| C28C12. 12  | 634 | 53. 85202517 |
| H35B03. 2   | 634 | 53. 85202517 |
| C27H6. 4    | 633 | 53. 76708506 |
| H20J04. 6   | 633 | 53. 76708506 |
| T08B2. 11   | 633 | 53. 76708506 |
| Y106G6H. 15 | 633 | 53. 76708506 |
| K07A12. 4   | 632 | 53. 68214496 |
| Y52B11A. 10 | 632 | 53. 68214496 |
| Y56A3A. 1   | 632 | 53. 68214496 |
| Y75B8A. 17  | 632 | 53. 68214496 |
| R08D7. 1    | 631 | 53. 59720486 |
| T08B2. 10   | 631 | 53. 59720486 |
| W07A8. 2    | 631 | 53. 59720486 |
| B0205. 1    | 630 | 53. 51226476 |
| K02F3. 1    | 630 | 53. 51226476 |
| Y104H12D. 1 | 630 | 53. 51226476 |
| Y111B2A. 10 | 630 | 53. 51226476 |
| Y48A5A. 2   | 630 | 53. 51226476 |
| C24F3. 1    | 629 | 53. 42732465 |
| H43I07. 2   | 629 | 53. 42732465 |
| C17H12. 1   | 628 | 53. 34238455 |
| F02E9. 9    | 628 | 53. 34238455 |
| M70. 4      | 628 | 53. 34238455 |
| Y51H7C. 5   | 628 | 53. 34238455 |
| ZK177. 8    | 628 | 53. 34238455 |
| F30A10. 6   | 627 | 53. 25744445 |
| Y71H2B. 2   | 627 | 53. 25744445 |
| ZK1127. 4   | 626 | 53. 17250435 |
| AC8. 10     | 625 | 53. 08756424 |
| F08F8. 10   | 625 | 53. 08756424 |
| F20G4. 2    | 625 | 53. 08756424 |
| F32A11. 2   | 625 | 53. 08756424 |
| F56D2. 7    | 625 | 53. 08756424 |
| ZK1010. 10  | 625 | 53. 08756424 |
| C44E4. 5    | 624 | 53. 00262414 |
| Y40B1B. 5   | 624 | 53. 00262414 |

|             |     |              |
|-------------|-----|--------------|
| Y71F9B. 3   | 624 | 53. 00262414 |
| ZK177. 2    | 624 | 53. 00262414 |
| B0495. 5    | 623 | 52. 91768404 |
| C15F1. 6    | 623 | 52. 91768404 |
| F28H6. 4    | 623 | 52. 91768404 |
| Y63D3A. 2   | 623 | 52. 91768404 |
| C04E6. 11   | 622 | 52. 83274393 |
| C06A8. 1    | 622 | 52. 83274393 |
| F42G4. 7    | 622 | 52. 83274393 |
| Y23H5A. 2   | 622 | 52. 83274393 |
| Y57A10A. 19 | 622 | 52. 83274393 |
| B0244. 8    | 621 | 52. 74780383 |
| C08H9. 3    | 620 | 52. 66286373 |
| C09H10. 10  | 620 | 52. 66286373 |
| F32B4. 4    | 620 | 52. 66286373 |
| F43D9. 4    | 620 | 52. 66286373 |
| T05F1. 4    | 620 | 52. 66286373 |
| Y14H12B. 1  | 620 | 52. 66286373 |
| F11H8. 1    | 619 | 52. 57792363 |
| C36B1. 14   | 618 | 52. 49298352 |
| F55A8. 2    | 618 | 52. 49298352 |
| Y37E3. 3    | 618 | 52. 49298352 |
| Y59A8B. 14  | 618 | 52. 49298352 |
| C29H12. 1   | 617 | 52. 40804342 |
| C50F7. 4    | 617 | 52. 40804342 |
| F56B3. 4    | 617 | 52. 40804342 |
| K09E4. 2    | 617 | 52. 40804342 |
| T27F6. 5    | 617 | 52. 40804342 |
| Y41E3. 7    | 617 | 52. 40804342 |
| F25G6. 8    | 616 | 52. 32310332 |
| F27D4. 8    | 616 | 52. 32310332 |
| F56G4. 5    | 616 | 52. 32310332 |
| Y66D12A. 19 | 616 | 52. 32310332 |
| EEED8. 9    | 615 | 52. 23816321 |
| Y32H12A. 2  | 615 | 52. 23816321 |
| ZK265. 6    | 615 | 52. 23816321 |
| F32B6. 8    | 614 | 52. 15322311 |
| F52E1. 1    | 614 | 52. 15322311 |
| T01D1. 2    | 614 | 52. 15322311 |
| T10F2. 2    | 614 | 52. 15322311 |
| T12D8. 7    | 614 | 52. 15322311 |
| T21C9. 12   | 614 | 52. 15322311 |
| Y110A7A. 7  | 614 | 52. 15322311 |
| C38D4. 7    | 613 | 52. 06828301 |
| F13D12. 4   | 613 | 52. 06828301 |
| F19B6. 1    | 613 | 52. 06828301 |
| F26F4. 1    | 613 | 52. 06828301 |
| F29C12. 3   | 613 | 52. 06828301 |
| W04D2. 4    | 613 | 52. 06828301 |
| Y39E4B. 7   | 613 | 52. 06828301 |
| ZK686. 6    | 613 | 52. 06828301 |
| C47E8. 4    | 612 | 51. 98334291 |
| R186. 3     | 612 | 51. 98334291 |
| Y76A2B. 5   | 612 | 51. 98334291 |



|             |     |              |
|-------------|-----|--------------|
| C13G3. 3    | 611 | 51. 8984028  |
| C55A6. 9    | 611 | 51. 8984028  |
| Y62E10A. 6  | 611 | 51. 8984028  |
| F44G4. 2    | 610 | 51. 8134627  |
| R02D3. 3    | 610 | 51. 8134627  |
| F21F3. 6    | 609 | 51. 7285226  |
| T21C12. 1   | 609 | 51. 7285226  |
| Y39B6A. 43  | 609 | 51. 7285226  |
| Y82E9BR. 19 | 609 | 51. 7285226  |
| C01F6. 1    | 608 | 51. 64358249 |
| F55B12. 4   | 608 | 51. 64358249 |
| Y48G1C. 12  | 608 | 51. 64358249 |
| B0261. 8    | 607 | 51. 55864239 |
| B0511. 6    | 607 | 51. 55864239 |
| K07A1. 17   | 607 | 51. 55864239 |
| K11C4. 5    | 607 | 51. 55864239 |
| W02A11. 8   | 607 | 51. 55864239 |
| Y116A8C. 30 | 607 | 51. 55864239 |
| F26H9. 6    | 606 | 51. 47370229 |
| F57B10. 1   | 605 | 51. 38876219 |
| W05B10. 1   | 605 | 51. 38876219 |
| C42C1. 14   | 604 | 51. 30382208 |
| F49E8. 1    | 604 | 51. 30382208 |
| ZC477. 5    | 604 | 51. 30382208 |
| B0285. 4    | 603 | 51. 21888198 |
| F12F6. 1    | 603 | 51. 21888198 |
| F59H6. 8    | 603 | 51. 21888198 |
| K11H3. 4    | 603 | 51. 21888198 |
| ZK546. 2    | 603 | 51. 21888198 |
| C09E9. 1    | 602 | 51. 13394188 |
| C48E7. 2    | 602 | 51. 13394188 |
| H06001. 3   | 602 | 51. 13394188 |
| T24H10. 1   | 601 | 51. 04900178 |
| R05D7. 5    | 600 | 50. 96406167 |
| T28D9. 2    | 600 | 50. 96406167 |
| W04D2. 3    | 600 | 50. 96406167 |
| F29B9. 6    | 599 | 50. 87912157 |
| Y110A7A. 13 | 598 | 50. 79418147 |
| B0361. 5    | 596 | 50. 62430126 |
| F44F4. 2    | 596 | 50. 62430126 |
| F54C1. 3    | 595 | 50. 53936116 |
| C37C3. 1    | 594 | 50. 45442106 |
| F40F9. 1    | 594 | 50. 45442106 |
| R05D11. 7   | 594 | 50. 45442106 |
| R06F6. 4    | 594 | 50. 45442106 |
| ZK1128. 1   | 594 | 50. 45442106 |
| C55C3. 3    | 593 | 50. 36948095 |
| F01F1. 12   | 593 | 50. 36948095 |
| Y65B4BL. 3  | 593 | 50. 36948095 |
| C47E12. 1   | 592 | 50. 28454085 |
| DY3. 8      | 592 | 50. 28454085 |
| M162. 8     | 592 | 50. 28454085 |
| W10D5. 3    | 592 | 50. 28454085 |
| F53G12. 4   | 591 | 50. 19960075 |

|           |     |              |
|-----------|-----|--------------|
| T04A8. 8  | 591 | 50. 19960075 |
| E01G4. 3  | 590 | 50. 11466064 |
| F53F4. 12 | 590 | 50. 11466064 |
| T05E11. 1 | 590 | 50. 11466064 |
| ZK643. 5  | 590 | 50. 11466064 |
| D1007. 6  | 589 | 50. 02972054 |
| H14E04. 1 | 589 | 50. 02972054 |
| C07G2. 2  | 588 | 49. 94478044 |
| C27F2. 10 | 588 | 49. 94478044 |
| B0464. 9  | 587 | 49. 85984034 |
| C09H6. 3  | 587 | 49. 85984034 |
| C36B1. 9  | 587 | 49. 85984034 |
| K11B4. 1  | 587 | 49. 85984034 |
| M04F3. 4  | 587 | 49. 85984034 |
| C30C11. 1 | 586 | 49. 77490023 |
| M117. 6   | 585 | 49. 68996013 |
| ZK632. 3  | 585 | 49. 68996013 |
| E02A10. 1 | 584 | 49. 60502003 |
| F41E6. 9  | 584 | 49. 60502003 |
| R07H5. 11 | 584 | 49. 60502003 |
| T23G5. 1  | 584 | 49. 60502003 |
| C41A3. 1  | 583 | 49. 52007993 |
| T05B9. 1  | 583 | 49. 52007993 |
| T16G12. 1 | 583 | 49. 52007993 |
| K07H8. 2  | 582 | 49. 43513982 |
| T22C1. 6  | 582 | 49. 43513982 |
| C55B7. 5  | 581 | 49. 35019972 |
| F59E12. 5 | 581 | 49. 35019972 |
| F01G4. 5  | 580 | 49. 26525962 |
| H05C05. 1 | 580 | 49. 26525962 |
| T24D1. 5  | 580 | 49. 26525962 |
| Y4C6B. 1  | 580 | 49. 26525962 |
| Y66H1A. 4 | 580 | 49. 26525962 |
| Y6D1A. 2  | 580 | 49. 26525962 |
| F19B6. 2  | 579 | 49. 18031951 |
| C52E4. 6  | 578 | 49. 09537941 |
| F40F12. 5 | 578 | 49. 09537941 |
| F45E12. 5 | 578 | 49. 09537941 |
| K07A3. 1  | 578 | 49. 09537941 |
| T09F3. 5  | 578 | 49. 09537941 |
| ZK512. 2  | 578 | 49. 09537941 |
| B0025. 4  | 577 | 49. 01043931 |
| C05D11. 1 | 577 | 49. 01043931 |
| C09G4. 3  | 577 | 49. 01043931 |
| T22D1. 3  | 577 | 49. 01043931 |
| F39G3. 3  | 576 | 48. 92549921 |
| H40L08. 1 | 576 | 48. 92549921 |
| Y49A3A. 5 | 576 | 48. 92549921 |
| ZK1128. 7 | 576 | 48. 92549921 |
| C02F4. 2  | 575 | 48. 8405591  |
| C05C8. 2  | 575 | 48. 8405591  |
| C07H6. 8  | 575 | 48. 8405591  |
| M7. 5     | 575 | 48. 8405591  |
| T01D3. 5  | 575 | 48. 8405591  |

|             |     |              |
|-------------|-----|--------------|
| W03G1. 8    | 575 | 48. 8405591  |
| Y54H5A. 1   | 575 | 48. 8405591  |
| C16A11. 5   | 574 | 48. 755619   |
| C27D6. 4    | 574 | 48. 755619   |
| F29C4. 7    | 574 | 48. 755619   |
| K04G7. 11   | 574 | 48. 755619   |
| T16H12. 3   | 574 | 48. 755619   |
| Y66D12A. 12 | 574 | 48. 755619   |
| C45G9. 5    | 573 | 48. 6706789  |
| F11A10. 3   | 573 | 48. 6706789  |
| F29F11. 1   | 573 | 48. 6706789  |
| F35G12. 12  | 573 | 48. 6706789  |
| F45G2. 4    | 573 | 48. 6706789  |
| ZC395. 2    | 573 | 48. 6706789  |
| D2023. 2    | 572 | 48. 58573879 |
| W06B4. 2    | 572 | 48. 58573879 |
| Y61A9LA. 1  | 572 | 48. 58573879 |
| C14B1. 5    | 571 | 48. 50079869 |
| C27F2. 1    | 571 | 48. 50079869 |
| C50D2. 8    | 571 | 48. 50079869 |
| F28B3. 5    | 570 | 48. 41585859 |
| F39H2. 4    | 570 | 48. 41585859 |
| T05H4. 14   | 570 | 48. 41585859 |
| T24D1. 4    | 570 | 48. 41585859 |
| Y41D4B. 21  | 570 | 48. 41585859 |
| Y63D3A. 9   | 570 | 48. 41585859 |
| ZK643. 2    | 570 | 48. 41585859 |
| B0511. 8    | 569 | 48. 33091849 |
| C01G8. 2    | 569 | 48. 33091849 |
| C27F2. 7    | 569 | 48. 33091849 |
| R08D7. 2    | 569 | 48. 33091849 |
| T02G5. 7    | 569 | 48. 33091849 |
| T05B11. 3   | 569 | 48. 33091849 |
| F46E10. 10  | 568 | 48. 24597838 |
| F14D2. 12   | 567 | 48. 16103828 |
| K08H10. 9   | 567 | 48. 16103828 |
| F57C2. 1    | 566 | 48. 07609818 |
| Y59A8B. 20  | 566 | 48. 07609818 |
| ZK863. 6    | 566 | 48. 07609818 |
| Y37D8A. 13  | 565 | 47. 99115808 |
| ZC410. 7    | 565 | 47. 99115808 |
| ZK1128. 6   | 565 | 47. 99115808 |
| ZK256. 1    | 565 | 47. 99115808 |
| C14C10. 2   | 564 | 47. 90621797 |
| F17C11. 1   | 564 | 47. 90621797 |
| T07G12. 10  | 564 | 47. 90621797 |
| T24B8. 2    | 564 | 47. 90621797 |
| Y108G3AL. 2 | 564 | 47. 90621797 |
| Y18H1A. 3   | 564 | 47. 90621797 |
| F30F8. 8    | 563 | 47. 82127787 |
| ZK1010. 1   | 563 | 47. 82127787 |
| ZK593. 8    | 563 | 47. 82127787 |
| ZK858. 1    | 563 | 47. 82127787 |
| C32A3. 3    | 562 | 47. 73633777 |

|             |     |              |
|-------------|-----|--------------|
| C32H11. 7   | 562 | 47. 73633777 |
| T27F7. 4    | 562 | 47. 73633777 |
| Y37E3. 5    | 562 | 47. 73633777 |
| Y67H2A. 1   | 562 | 47. 73633777 |
| E04F6. 11   | 561 | 47. 65139766 |
| Y56A3A. 32  | 561 | 47. 65139766 |
| F11A10. 2   | 560 | 47. 56645756 |
| T07A9. 11   | 560 | 47. 56645756 |
| ZK177. 5    | 560 | 47. 56645756 |
| F53H1. 1    | 559 | 47. 48151746 |
| T02G5. 9    | 559 | 47. 48151746 |
| Y32G9A. 2   | 559 | 47. 48151746 |
| C27A12. 2   | 558 | 47. 39657736 |
| F23H11. 9   | 558 | 47. 39657736 |
| T25G3. 4    | 558 | 47. 39657736 |
| Y71F9AM. 6  | 558 | 47. 39657736 |
| W01A11. 1   | 557 | 47. 31163725 |
| Y57A10A. 7  | 557 | 47. 31163725 |
| F48G7. 4    | 556 | 47. 22669715 |
| Y17G9B. 4   | 556 | 47. 22669715 |
| F13G3. 9    | 555 | 47. 14175705 |
| F13H10. 3   | 555 | 47. 14175705 |
| W08G11. 3   | 555 | 47. 14175705 |
| C17D12. 1   | 554 | 47. 05681694 |
| F59E12. 4   | 554 | 47. 05681694 |
| C25A1. 4    | 553 | 46. 97187684 |
| M03C11. 3   | 553 | 46. 97187684 |
| T03F6. 2    | 553 | 46. 97187684 |
| Y97E10AR. 5 | 553 | 46. 97187684 |
| H02I12. 6   | 552 | 46. 88693674 |
| T13C2. 6    | 552 | 46. 88693674 |
| F36D1. 9    | 551 | 46. 80199664 |
| K07A1. 16   | 551 | 46. 80199664 |
| R166. 3     | 551 | 46. 80199664 |
| D1007. 12   | 550 | 46. 71705653 |
| F40G9. 11   | 550 | 46. 71705653 |
| T03F1. 7    | 550 | 46. 71705653 |
| Y50D7A. 3   | 550 | 46. 71705653 |
| C01F1. 1    | 549 | 46. 63211643 |
| T28B8. 1    | 549 | 46. 63211643 |
| D2030. 9    | 548 | 46. 54717633 |
| F42A9. 8    | 548 | 46. 54717633 |
| B0041. 5    | 547 | 46. 46223622 |
| C29A12. 3   | 547 | 46. 46223622 |
| W07G4. 4    | 547 | 46. 46223622 |
| D1007. 16   | 546 | 46. 37729612 |
| F59A3. 3    | 546 | 46. 37729612 |
| C05B10. 1   | 545 | 46. 29235602 |
| C26H9A. 2   | 545 | 46. 29235602 |
| C56G2. 6    | 545 | 46. 29235602 |
| F10E9. 5    | 545 | 46. 29235602 |
| F16H11. 3   | 545 | 46. 29235602 |
| F26B1. 2    | 545 | 46. 29235602 |
| R144. 12    | 545 | 46. 29235602 |

|             |     |              |
|-------------|-----|--------------|
| Y42G9A. 6   | 545 | 46. 29235602 |
| ZK632. 12   | 545 | 46. 29235602 |
| C15H11. 6   | 544 | 46. 20741592 |
| C37A5. 9    | 544 | 46. 20741592 |
| F31D4. 2    | 544 | 46. 20741592 |
| H04D03. 1   | 544 | 46. 20741592 |
| R02D3. 5    | 544 | 46. 20741592 |
| F28B3. 4    | 543 | 46. 12247581 |
| Y110A7A. 5  | 543 | 46. 12247581 |
| Y40B1A. 3   | 543 | 46. 12247581 |
| F26F4. 10   | 542 | 46. 03753571 |
| Y48E1C. 1   | 542 | 46. 03753571 |
| F39B2. 11   | 541 | 45. 95259561 |
| Y49E10. 3   | 541 | 45. 95259561 |
| R12E2. 3    | 540 | 45. 86765551 |
| Y39G10AL. 3 | 540 | 45. 86765551 |
| Y61A9LA. 9  | 540 | 45. 86765551 |
| F42A6. 9    | 539 | 45. 7827154  |
| F58A4. 4    | 539 | 45. 7827154  |
| T25G3. 3    | 539 | 45. 7827154  |
| T26E3. 3    | 539 | 45. 7827154  |
| Y11D7A. 7   | 539 | 45. 7827154  |
| F02E8. 1    | 538 | 45. 6977753  |
| F02E9. 2    | 538 | 45. 6977753  |
| Y74C10AL. 2 | 538 | 45. 6977753  |
| ZK180. 4    | 538 | 45. 6977753  |
| ZK637. 5    | 538 | 45. 6977753  |
| F56A8. 6    | 537 | 45. 6128352  |
| T21D12. 3   | 537 | 45. 6128352  |
| ZK1058. 5   | 537 | 45. 6128352  |
| C01G8. 3    | 536 | 45. 52789509 |
| F17C11. 7   | 536 | 45. 52789509 |
| K12C11. 2   | 536 | 45. 52789509 |
| B0491. 5    | 535 | 45. 44295499 |
| W10G11. 20  | 535 | 45. 44295499 |
| F23H11. 3   | 534 | 45. 35801489 |
| T04D1. 3    | 534 | 45. 35801489 |
| T25E12. 5   | 534 | 45. 35801489 |
| Y105E8A. 20 | 534 | 45. 35801489 |
| Y48C3A. 10  | 534 | 45. 35801489 |
| C15F1. 8    | 533 | 45. 27307479 |
| F55F8. 5    | 533 | 45. 27307479 |
| W02D3. 11   | 533 | 45. 27307479 |
| F25H2. 13   | 532 | 45. 18813468 |
| F26A3. 1    | 532 | 45. 18813468 |
| K11H12. 2   | 532 | 45. 18813468 |
| R119. 6     | 532 | 45. 18813468 |
| Y54E5B. 4   | 532 | 45. 18813468 |
| Y75B8A. 31  | 532 | 45. 18813468 |
| C39E9. 13   | 531 | 45. 10319458 |
| F45G2. 3    | 531 | 45. 10319458 |
| M04B2. 2    | 530 | 45. 01825448 |
| M116. 5     | 530 | 45. 01825448 |
| T07G12. 8   | 530 | 45. 01825448 |

|              |     |              |
|--------------|-----|--------------|
| T21B10. 2    | 530 | 45. 01825448 |
| ZK550. 3     | 530 | 45. 01825448 |
| F29B9. 9     | 529 | 44. 93331437 |
| R07G3. 1     | 529 | 44. 93331437 |
| R09E10. 7    | 529 | 44. 93331437 |
| T26A5. 7     | 529 | 44. 93331437 |
| Y37D8A. 16   | 529 | 44. 93331437 |
| Y69A2AR. 2   | 529 | 44. 93331437 |
| ZC168. 4     | 529 | 44. 93331437 |
| ZK546. 13    | 529 | 44. 93331437 |
| C42C1. 11    | 528 | 44. 84837427 |
| F54D8. 2     | 528 | 44. 84837427 |
| W04C9. 5     | 528 | 44. 84837427 |
| Y66H1A. 2    | 528 | 44. 84837427 |
| C32D5. 3     | 527 | 44. 76343417 |
| F22F7. 5     | 527 | 44. 76343417 |
| F38E1. 7     | 527 | 44. 76343417 |
| Y62E10A. 11  | 527 | 44. 76343417 |
| CD4. 3       | 526 | 44. 67849407 |
| F09E5. 2     | 526 | 44. 67849407 |
| K11B4. 2     | 526 | 44. 67849407 |
| D1086. 4     | 525 | 44. 59355396 |
| F57B9. 7     | 525 | 44. 59355396 |
| H02I12. 8    | 525 | 44. 59355396 |
| R11H6. 1     | 525 | 44. 59355396 |
| ZK973. 6     | 525 | 44. 59355396 |
| C09H10. 5    | 524 | 44. 50861386 |
| F36D4. 2     | 524 | 44. 50861386 |
| C28A5. 4     | 523 | 44. 42367376 |
| F54E12. 4    | 523 | 44. 42367376 |
| T10C6. 6     | 523 | 44. 42367376 |
| C34E10. 1    | 522 | 44. 33873366 |
| ZK1098. 1    | 522 | 44. 33873366 |
| B0252. 4     | 521 | 44. 25379355 |
| M03F8. 2     | 521 | 44. 25379355 |
| B0280. 3     | 520 | 44. 16885345 |
| BE0003N10. 1 | 520 | 44. 16885345 |
| C48B6. 3     | 520 | 44. 16885345 |
| Y48G8AL. 10  | 520 | 44. 16885345 |
| K09B11. 4    | 519 | 44. 08391335 |
| ZC262. 2     | 519 | 44. 08391335 |
| C56C10. 1    | 518 | 43. 99897324 |
| F25H2. 11    | 518 | 43. 99897324 |
| K07H8. 3     | 518 | 43. 99897324 |
| T08D2. 1     | 518 | 43. 99897324 |
| Y41C4A. 10   | 518 | 43. 99897324 |
| D2030. 2     | 517 | 43. 91403314 |
| F49E12. 1    | 517 | 43. 91403314 |
| F56A6. 1     | 517 | 43. 91403314 |
| ZK593. 6     | 517 | 43. 91403314 |
| F23C8. 9     | 516 | 43. 82909304 |
| F35G12. 1    | 516 | 43. 82909304 |
| Y55D5A. 1    | 516 | 43. 82909304 |
| C26B2. 7     | 515 | 43. 74415294 |

|             |     |              |
|-------------|-----|--------------|
| C37H5. 6    | 515 | 43. 74415294 |
| R08C7. 3    | 515 | 43. 74415294 |
| B0336. 10   | 514 | 43. 65921283 |
| T24B8. 1    | 514 | 43. 65921283 |
| Y54E10BR. 1 | 514 | 43. 65921283 |
| C33F10. 4   | 513 | 43. 57427273 |
| D2013. 3    | 513 | 43. 57427273 |
| T23G11. 2   | 513 | 43. 57427273 |
| Y50D4C. 2   | 513 | 43. 57427273 |
| ZK1058. 1   | 513 | 43. 57427273 |
| B0035. 2    | 512 | 43. 48933263 |
| F49C12. 8   | 512 | 43. 48933263 |
| W03A5. 7    | 512 | 43. 48933263 |
| Y19D10A. 4  | 512 | 43. 48933263 |
| Y46H3C. 4   | 512 | 43. 48933263 |
| Y66D12A. 14 | 512 | 43. 48933263 |
| W02G9. 10   | 511 | 43. 40439252 |
| Y105E8A. 3  | 511 | 43. 40439252 |
| Y54G2A. 23  | 511 | 43. 40439252 |
| B0285. 1    | 510 | 43. 31945242 |
| C39E9. 11   | 510 | 43. 31945242 |
| K09E3. 4    | 510 | 43. 31945242 |
| Y47H9C. 6   | 510 | 43. 31945242 |
| ZK1320. 12  | 510 | 43. 31945242 |
| B0205. 8    | 509 | 43. 23451232 |
| F25H2. 9    | 509 | 43. 23451232 |
| C05H8. 1    | 508 | 43. 14957222 |
| F22B5. 2    | 508 | 43. 14957222 |
| F46A9. 5    | 508 | 43. 14957222 |
| K06A5. 1    | 508 | 43. 14957222 |
| T20H4. 3    | 508 | 43. 14957222 |
| Y41D4A. 4   | 508 | 43. 14957222 |
| Y67D2. 7    | 508 | 43. 14957222 |
| K06H7. 7    | 507 | 43. 06463211 |
| Y51F10. 5   | 507 | 43. 06463211 |
| F11A3. 2    | 506 | 42. 97969201 |
| F11G11. 5   | 506 | 42. 97969201 |
| F13G3. 6    | 506 | 42. 97969201 |
| F37A4. 1    | 506 | 42. 97969201 |
| F43D2. 1    | 506 | 42. 97969201 |
| K06H7. 9    | 506 | 42. 97969201 |
| M04F3. 2    | 506 | 42. 97969201 |
| W02F12. 3   | 506 | 42. 97969201 |
| W04A8. 2    | 506 | 42. 97969201 |
| T28D6. 6    | 505 | 42. 89475191 |
| W10G11. 19  | 505 | 42. 89475191 |
| C39F7. 5    | 504 | 42. 80981181 |
| F43G9. 1    | 504 | 42. 80981181 |
| T04C12. 5   | 504 | 42. 80981181 |
| T13F2. 7    | 504 | 42. 80981181 |
| ZC328. 4    | 504 | 42. 80981181 |
| F55H2. 1    | 503 | 42. 7248717  |
| K04G2. 1    | 503 | 42. 7248717  |
| C25A1. 16   | 502 | 42. 6399316  |

|             |     |              |
|-------------|-----|--------------|
| C50B8. 3    | 502 | 42. 6399316  |
| F43G9. 6    | 502 | 42. 6399316  |
| Y48G8AL. 11 | 502 | 42. 6399316  |
| Y53F4B. 15  | 502 | 42. 6399316  |
| ZK1010. 3   | 502 | 42. 6399316  |
| ZK856. 5    | 502 | 42. 6399316  |
| C34D4. 12   | 501 | 42. 5549915  |
| CD4. 4      | 501 | 42. 5549915  |
| F18A11. 2   | 501 | 42. 5549915  |
| Y50D4C. 3   | 501 | 42. 5549915  |
| Y57A10A. 15 | 501 | 42. 5549915  |
| C01G10. 8   | 500 | 42. 47005139 |
| F13E9. 1    | 500 | 42. 47005139 |
| F35D11. 5   | 500 | 42. 47005139 |
| C53D5. 4    | 499 | 42. 38511129 |
| R02F2. 1    | 499 | 42. 38511129 |
| Y62E10A. 8  | 499 | 42. 38511129 |
| B0348. 5    | 498 | 42. 30017119 |
| W09G3. 1    | 498 | 42. 30017119 |
| Y37E3. 10   | 498 | 42. 30017119 |
| Y66A7A. 2   | 498 | 42. 30017119 |
| C25A1. 13   | 497 | 42. 21523109 |
| C50F4. 16   | 497 | 42. 21523109 |
| F21C3. 5    | 497 | 42. 21523109 |
| F54C8. 2    | 497 | 42. 21523109 |
| K02F2. 2    | 497 | 42. 21523109 |
| T13H2. 4    | 497 | 42. 21523109 |
| Y102A5C. 36 | 497 | 42. 21523109 |
| R07E5. 14   | 496 | 42. 13029098 |
| ZC395. 10   | 496 | 42. 13029098 |
| F40D4. 17   | 495 | 42. 04535088 |
| M7. 1       | 495 | 42. 04535088 |
| C30A5. 2    | 494 | 41. 96041078 |
| Y57A10A. 29 | 494 | 41. 96041078 |
| C14A4. 2    | 493 | 41. 87547067 |
| F58B3. 4    | 493 | 41. 87547067 |
| C33F10. 2   | 492 | 41. 79053057 |
| F39H2. 5    | 492 | 41. 79053057 |
| F41C3. 3    | 492 | 41. 79053057 |
| F59A2. 5    | 492 | 41. 79053057 |
| C27B7. 2    | 491 | 41. 70559047 |
| T16H12. 13  | 491 | 41. 70559047 |
| ZK863. 3    | 491 | 41. 70559047 |
| B0393. 2    | 490 | 41. 62065037 |
| C14B9. 7    | 490 | 41. 62065037 |
| C42C1. 15   | 490 | 41. 62065037 |
| C50B6. 3    | 490 | 41. 62065037 |
| F42H10. 6   | 490 | 41. 62065037 |
| F54D5. 2    | 490 | 41. 62065037 |
| Y119C1B. 4  | 490 | 41. 62065037 |
| C33C12. 8   | 489 | 41. 53571026 |
| C56A3. 8    | 489 | 41. 53571026 |
| F32E10. 5   | 489 | 41. 53571026 |
| F55A3. 5    | 489 | 41. 53571026 |



|              |     |              |
|--------------|-----|--------------|
| Y110A2AL. 13 | 489 | 41. 53571026 |
| Y92H12A. 2   | 489 | 41. 53571026 |
| ZK1098. 4    | 489 | 41. 53571026 |
| C01A2. 1     | 488 | 41. 45077016 |
| C24D10. 4    | 488 | 41. 45077016 |
| R06B9. 6     | 488 | 41. 45077016 |
| Y119D3B. 12  | 488 | 41. 45077016 |
| C10G11. 5    | 487 | 41. 36583006 |
| Y54E10BL. 5  | 487 | 41. 36583006 |
| ZK402. 3     | 487 | 41. 36583006 |
| C07G1. 4     | 486 | 41. 28088995 |
| F08B6. 2     | 486 | 41. 28088995 |
| F13G3. 11    | 486 | 41. 28088995 |
| W02D7. 6     | 486 | 41. 28088995 |
| Y17G9B. 3    | 486 | 41. 28088995 |
| W09D6. 1     | 485 | 41. 19594985 |
| B0334. 4     | 484 | 41. 11100975 |
| Y38H6C. 5    | 484 | 41. 11100975 |
| Y56A3A. 12   | 484 | 41. 11100975 |
| ZK430. 2     | 484 | 41. 11100975 |
| Y39B6A. 46   | 482 | 40. 94112954 |
| F29F11. 6    | 481 | 40. 85618944 |
| F33H2. 3     | 481 | 40. 85618944 |
| F56F3. 5     | 481 | 40. 85618944 |
| Y41D4A. 3    | 481 | 40. 85618944 |
| ZK973. 11    | 481 | 40. 85618944 |
| C41D11. 4    | 480 | 40. 77124934 |
| ZK892. 6     | 480 | 40. 77124934 |
| F33H2. 6     | 479 | 40. 68630924 |
| Y60A3A. 14   | 479 | 40. 68630924 |
| ZK1320. 11   | 479 | 40. 68630924 |
| C04H5. 1     | 478 | 40. 60136913 |
| C05C10. 5    | 478 | 40. 60136913 |
| T06E6. 2     | 478 | 40. 60136913 |
| C24H11. 9    | 477 | 40. 51642903 |
| JC8. 2       | 477 | 40. 51642903 |
| Y37B11A. 2   | 477 | 40. 51642903 |
| Y75B8A. 16   | 477 | 40. 51642903 |
| T22A3. 5     | 476 | 40. 43148893 |
| Y108F1. 4    | 476 | 40. 43148893 |
| Y20F4. 8     | 476 | 40. 43148893 |
| Y54E5A. 2    | 476 | 40. 43148893 |
| W03C9. 3     | 475 | 40. 34654882 |
| Y44F5A. 1    | 475 | 40. 34654882 |
| D1054. 2     | 474 | 40. 26160872 |
| M01B12. 3    | 474 | 40. 26160872 |
| T20G5. 10    | 474 | 40. 26160872 |
| Y53H1A. 1    | 473 | 40. 17666862 |
| B0001. 1     | 472 | 40. 09172852 |
| F47B7. 6     | 472 | 40. 09172852 |
| T10B11. 6    | 472 | 40. 09172852 |
| T12B3. 4     | 472 | 40. 09172852 |
| B0393. 6     | 471 | 40. 00678841 |
| C47B2. 2     | 471 | 40. 00678841 |

|             |     |              |
|-------------|-----|--------------|
| C49F5. 6    | 471 | 40. 00678841 |
| F44G4. 4    | 471 | 40. 00678841 |
| K10D2. 8    | 471 | 40. 00678841 |
| T06D8. 5    | 471 | 40. 00678841 |
| F40F8. 3    | 470 | 39. 92184831 |
| C54G10. 2   | 469 | 39. 83690821 |
| F26H9. 7    | 469 | 39. 83690821 |
| K03B4. 3    | 469 | 39. 83690821 |
| Y37D8A. 17  | 469 | 39. 83690821 |
| Y41C4A. 4   | 469 | 39. 83690821 |
| C38C10. 2   | 468 | 39. 7519681  |
| C41D11. 6   | 468 | 39. 7519681  |
| C54C6. 6    | 468 | 39. 7519681  |
| C56C10. 8   | 468 | 39. 7519681  |
| F10E7. 7    | 468 | 39. 7519681  |
| F49B2. 3    | 467 | 39. 667028   |
| M01E11. 7   | 467 | 39. 667028   |
| T22F3. 12   | 467 | 39. 667028   |
| Y57A10A. 30 | 467 | 39. 667028   |
| C06B8. 8    | 466 | 39. 5820879  |
| C08B6. 8    | 466 | 39. 5820879  |
| F54A3. 6    | 466 | 39. 5820879  |
| R04F11. 3   | 466 | 39. 5820879  |
| Y48G1A. 2   | 466 | 39. 5820879  |
| ZC123. 4    | 466 | 39. 5820879  |
| T06D8. 7    | 465 | 39. 4971478  |
| Y46G5A. 13  | 465 | 39. 4971478  |
| C47B2. 1    | 464 | 39. 41220769 |
| F37C12. 2   | 464 | 39. 41220769 |
| F52B10. 1   | 464 | 39. 41220769 |
| F58F12. 1   | 464 | 39. 41220769 |
| T07F8. 4    | 464 | 39. 41220769 |
| Y77E11A. 1  | 464 | 39. 41220769 |
| K10D2. 2    | 463 | 39. 32726759 |
| F41C3. 4    | 462 | 39. 24232749 |
| F56E10. 1   | 462 | 39. 24232749 |
| C28D4. 2    | 461 | 39. 15738739 |
| E02H9. 2    | 461 | 39. 15738739 |
| F25H2. 10   | 461 | 39. 15738739 |
| H14E04. 5   | 461 | 39. 15738739 |
| T27E9. 2    | 461 | 39. 15738739 |
| Y43F4A. 3   | 461 | 39. 15738739 |
| Y53F4B. 18  | 461 | 39. 15738739 |
| Y54E10A. 12 | 461 | 39. 15738739 |
| C06H2. 6    | 460 | 39. 07244728 |
| F32B6. 3    | 460 | 39. 07244728 |
| Y113G7B. 16 | 460 | 39. 07244728 |
| Y71G12B. 11 | 460 | 39. 07244728 |
| C03C10. 3   | 459 | 38. 98750718 |
| C04C3. 3    | 459 | 38. 98750718 |
| E04F6. 5    | 459 | 38. 98750718 |
| F10G8. 9    | 459 | 38. 98750718 |
| F33E11. 6   | 459 | 38. 98750718 |
| T23B12. 6   | 459 | 38. 98750718 |

|             |     |              |
|-------------|-----|--------------|
| Y45G12C. 16 | 459 | 38. 98750718 |
| C06B8. 7    | 458 | 38. 90256708 |
| C41D11. 7   | 458 | 38. 90256708 |
| F25B5. 7    | 458 | 38. 90256708 |
| T23B12. 1   | 458 | 38. 90256708 |
| Y38H8A. 7   | 458 | 38. 90256708 |
| Y75D11A. 1  | 458 | 38. 90256708 |
| ZK550. 5    | 458 | 38. 90256708 |
| C16C2. 4    | 457 | 38. 81762697 |
| F55C9. 3    | 457 | 38. 81762697 |
| K02D10. 5   | 457 | 38. 81762697 |
| Y102A5C. 18 | 457 | 38. 81762697 |
| Y48C3A. 18  | 457 | 38. 81762697 |
| Y73F8A. 24  | 457 | 38. 81762697 |
| C09G9. 2    | 456 | 38. 73268687 |
| C53A5. 13   | 456 | 38. 73268687 |
| Y45F10A. 3  | 456 | 38. 73268687 |
| ZK402. 1    | 456 | 38. 73268687 |
| C09G4. 4    | 455 | 38. 64774677 |
| K08E4. 7    | 455 | 38. 64774677 |
| Y53H1A. 5   | 455 | 38. 64774677 |
| C33H5. 7    | 454 | 38. 56280667 |
| K08A2. 4    | 454 | 38. 56280667 |
| Y45G12B. 3  | 454 | 38. 56280667 |
| Y73B6BL. 4  | 454 | 38. 56280667 |
| C52E12. 3   | 453 | 38. 47786656 |
| F48A11. 5   | 453 | 38. 47786656 |
| T15H9. 7    | 453 | 38. 47786656 |
| Y50E8A. 4   | 453 | 38. 47786656 |
| C06C3. 8    | 452 | 38. 39292646 |
| F35B12. 5   | 452 | 38. 39292646 |
| VH15N14R. 1 | 452 | 38. 39292646 |
| Y71H2AL. 1  | 452 | 38. 39292646 |
| B0238. 11   | 451 | 38. 30798636 |
| C52B11. 2   | 451 | 38. 30798636 |
| T05G5. 7    | 451 | 38. 30798636 |
| VB0393L. 2  | 451 | 38. 30798636 |
| Y110A7A. 11 | 451 | 38. 30798636 |
| C36A4. 4    | 450 | 38. 22304625 |
| F37D6. 2    | 450 | 38. 22304625 |
| R13. 4      | 450 | 38. 22304625 |
| W03C9. 2    | 450 | 38. 22304625 |
| F18A1. 8    | 448 | 38. 05316605 |
| F36H9. 3    | 448 | 38. 05316605 |
| F56H11. 4   | 448 | 38. 05316605 |
| Y45F10A. 4  | 448 | 38. 05316605 |
| B0336. 6    | 447 | 37. 96822595 |
| R144. 10    | 447 | 37. 96822595 |
| T14G8. 3    | 447 | 37. 96822595 |
| Y105E8A. 7  | 447 | 37. 96822595 |
| Y41C4A. 12  | 447 | 37. 96822595 |
| C15C6. 4    | 446 | 37. 88328584 |
| F32D8. 4    | 446 | 37. 88328584 |
| F33E11. 2   | 446 | 37. 88328584 |

|            |     |              |
|------------|-----|--------------|
| T23G11. 4  | 446 | 37. 88328584 |
| Y39B6A. 16 | 446 | 37. 88328584 |
| Y73F8A. 26 | 446 | 37. 88328584 |
| C25G4. 3   | 445 | 37. 79834574 |
| T04A8. 10  | 445 | 37. 79834574 |
| Y43F4B. 9  | 445 | 37. 79834574 |
| C08B11. 2  | 444 | 37. 71340564 |
| F53H2. 3   | 443 | 37. 62846554 |
| H14A12. 5  | 443 | 37. 62846554 |
| Y38F2AL. 3 | 443 | 37. 62846554 |
| F55C5. 5   | 442 | 37. 54352543 |
| F56C9. 11  | 442 | 37. 54352543 |
| Y71F9B. 6  | 442 | 37. 54352543 |
| C14C10. 6  | 441 | 37. 45858533 |
| C52E12. 2  | 441 | 37. 45858533 |
| F53A2. 6   | 441 | 37. 45858533 |
| Y39B6A. 12 | 441 | 37. 45858533 |
| B0546. 3   | 440 | 37. 37364523 |
| Y47G6A. 31 | 440 | 37. 37364523 |
| Y51H1A. 5  | 440 | 37. 37364523 |
| C18E3. 8   | 439 | 37. 28870512 |
| K02E2. 6   | 439 | 37. 28870512 |
| T26A5. 8   | 439 | 37. 28870512 |
| Y47D3A. 17 | 439 | 37. 28870512 |
| Y55D9A. 2  | 439 | 37. 28870512 |
| C09E7. 9   | 438 | 37. 20376502 |
| C30B5. 2   | 438 | 37. 20376502 |
| C32E8. 5   | 438 | 37. 20376502 |
| T10E9. 2   | 438 | 37. 20376502 |
| ZK662. 3   | 438 | 37. 20376502 |
| AC8. 4     | 437 | 37. 11882492 |
| C53A5. 16  | 437 | 37. 11882492 |
| D1054. 14  | 437 | 37. 11882492 |
| F18E9. 5   | 436 | 37. 03388482 |
| T13H5. 4   | 436 | 37. 03388482 |
| T26A5. 9   | 436 | 37. 03388482 |
| Y37E11B. 6 | 436 | 37. 03388482 |
| ZK632. 2   | 436 | 37. 03388482 |
| ZK863. 7   | 436 | 37. 03388482 |
| C06G3. 10  | 435 | 36. 94894471 |
| C16C8. 5   | 435 | 36. 94894471 |
| F01D4. 4   | 435 | 36. 94894471 |
| F32A5. 7   | 435 | 36. 94894471 |
| W05F2. 4   | 435 | 36. 94894471 |
| Y51H7C. 7  | 435 | 36. 94894471 |
| F12F6. 5   | 434 | 36. 86400461 |
| R02C2. 4   | 434 | 36. 86400461 |
| R04E5. 9   | 434 | 36. 86400461 |
| Y44A6D. 3  | 434 | 36. 86400461 |
| Y48G1BM. 7 | 434 | 36. 86400461 |
| ZK652. 10  | 434 | 36. 86400461 |
| B0334. 8   | 433 | 36. 77906451 |
| F54C9. 6   | 433 | 36. 77906451 |
| K12H4. 2   | 433 | 36. 77906451 |

|             |     |              |
|-------------|-----|--------------|
| R11D1. 1    | 433 | 36. 77906451 |
| T16G12. 8   | 433 | 36. 77906451 |
| ZC434. 4    | 433 | 36. 77906451 |
| C06A8. 4    | 432 | 36. 6941244  |
| C33C12. 11  | 432 | 36. 6941244  |
| F26F4. 8    | 431 | 36. 6091843  |
| Y47D3A. 23  | 431 | 36. 6091843  |
| F12F6. 3    | 430 | 36. 5242442  |
| F28C6. 7    | 430 | 36. 5242442  |
| F39H2. 3    | 430 | 36. 5242442  |
| F54E4. 1    | 430 | 36. 5242442  |
| Y106G6H. 8  | 430 | 36. 5242442  |
| Y55F3AR. 1  | 430 | 36. 5242442  |
| Y60A3A. 8   | 430 | 36. 5242442  |
| ZK1005. 1   | 430 | 36. 5242442  |
| C27H6. 1    | 429 | 36. 4393041  |
| Y48A6B. 5   | 429 | 36. 4393041  |
| C44B7. 10   | 428 | 36. 35436399 |
| T04D1. 2    | 428 | 36. 35436399 |
| T20B12. 2   | 428 | 36. 35436399 |
| T20G5. 9    | 428 | 36. 35436399 |
| Y47H10A. 1  | 428 | 36. 35436399 |
| Y59A8A. 3   | 428 | 36. 35436399 |
| C37A5. 1    | 427 | 36. 26942389 |
| D2024. 3    | 427 | 36. 26942389 |
| T23D8. 3    | 427 | 36. 26942389 |
| Y116A8C. 34 | 427 | 36. 26942389 |
| Y55F3BR. 4  | 427 | 36. 26942389 |
| Y71H2AR. 1  | 427 | 36. 26942389 |
| ZC434. 2    | 427 | 36. 26942389 |
| R144. 5     | 426 | 36. 18448379 |
| T07E3. 5    | 426 | 36. 18448379 |
| W09D6. 6    | 426 | 36. 18448379 |
| Y106G6E. 5  | 426 | 36. 18448379 |
| Y45F10D. 9  | 426 | 36. 18448379 |
| F09G2. 8    | 425 | 36. 09954368 |
| F21H12. 4   | 425 | 36. 09954368 |
| H35N09. 2   | 425 | 36. 09954368 |
| Y11D7A. 10  | 425 | 36. 09954368 |
| Y73B3A. 3   | 425 | 36. 09954368 |
| Y75B12B. 4  | 425 | 36. 09954368 |
| ZK1127. 1   | 425 | 36. 09954368 |
| F26H11. 1   | 424 | 36. 01460358 |
| F57A10. 2   | 424 | 36. 01460358 |
| T22H9. 1    | 423 | 35. 92966348 |
| Y55F3AM. 6  | 423 | 35. 92966348 |
| Y63D3A. 8   | 423 | 35. 92966348 |
| C48E7. 3    | 422 | 35. 84472338 |
| F33D11. 11  | 422 | 35. 84472338 |
| K10C8. 3    | 422 | 35. 84472338 |
| T27F6. 7    | 422 | 35. 84472338 |
| C14A4. 14   | 421 | 35. 75978327 |
| F08F8. 8    | 421 | 35. 75978327 |
| F13G3. 4    | 421 | 35. 75978327 |

|             |     |              |
|-------------|-----|--------------|
| F35H10. 6   | 421 | 35. 75978327 |
| F45H7. 6    | 421 | 35. 75978327 |
| Y54G11A. 13 | 421 | 35. 75978327 |
| Y66D12A. 3  | 421 | 35. 75978327 |
| C50F4. 12   | 420 | 35. 67484317 |
| T02C12. 2   | 420 | 35. 67484317 |
| F33G12. 2   | 419 | 35. 58990307 |
| K10B3. 5    | 419 | 35. 58990307 |
| T24G10. 2   | 419 | 35. 58990307 |
| Y54G11A. 1  | 419 | 35. 58990307 |
| C05D10. 2   | 418 | 35. 50496297 |
| F13H8. 8    | 418 | 35. 50496297 |
| F30A10. 3   | 418 | 35. 50496297 |
| F56C11. 5   | 418 | 35. 50496297 |
| R10F2. 1    | 418 | 35. 50496297 |
| Y48A6C. 4   | 418 | 35. 50496297 |
| C32D5. 12   | 417 | 35. 42002286 |
| R186. 8     | 417 | 35. 42002286 |
| Y94H6A. 7   | 417 | 35. 42002286 |
| T10B10. 3   | 416 | 35. 33508276 |
| Y50D7A. 5   | 416 | 35. 33508276 |
| C27A12. 7   | 415 | 35. 25014266 |
| Y62E10A. 15 | 415 | 35. 25014266 |
| ZK652. 1    | 415 | 35. 25014266 |
| C47B2. 7    | 414 | 35. 16520255 |
| T03D8. 2    | 414 | 35. 16520255 |
| T06D10. 2   | 414 | 35. 16520255 |
| T24H10. 3   | 414 | 35. 16520255 |
| Y54G2A. 12  | 414 | 35. 16520255 |
| Y56A3A. 22  | 414 | 35. 16520255 |
| C27B7. 8    | 413 | 35. 08026245 |
| CD4. 6      | 412 | 34. 99532235 |
| E04A4. 7    | 412 | 34. 99532235 |
| M01F1. 1    | 412 | 34. 99532235 |
| Y53G8B. 3   | 412 | 34. 99532235 |
| Y54E10BR. 8 | 412 | 34. 99532235 |
| ZK1307. 5   | 412 | 34. 99532235 |
| ZK1320. 7   | 412 | 34. 99532235 |
| F08B4. 6    | 411 | 34. 91038225 |
| F44B9. 4    | 411 | 34. 91038225 |
| Y71H2AM. 20 | 411 | 34. 91038225 |
| F20D1. 3    | 410 | 34. 82544214 |
| F29C4. 6    | 410 | 34. 82544214 |
| K07A1. 9    | 410 | 34. 82544214 |
| D2030. 1    | 409 | 34. 74050204 |
| F55B11. 6   | 409 | 34. 74050204 |
| Y60A3A. 19  | 409 | 34. 74050204 |
| Y76B12C. 3  | 409 | 34. 74050204 |
| C43E11. 12  | 408 | 34. 65556194 |
| K02B2. 3    | 408 | 34. 65556194 |
| Y37E11AL. 1 | 408 | 34. 65556194 |
| C29E4. 5    | 407 | 34. 57062183 |
| F33D11. 10  | 407 | 34. 57062183 |
| Y48A5A. 3   | 407 | 34. 57062183 |

|             |     |              |
|-------------|-----|--------------|
| Y76A2B. 2   | 407 | 34. 57062183 |
| B0361. 8    | 406 | 34. 48568173 |
| C34C12. 9   | 406 | 34. 48568173 |
| F09G8. 3    | 406 | 34. 48568173 |
| F57C7. 1    | 406 | 34. 48568173 |
| T15H9. 2    | 406 | 34. 48568173 |
| F15D4. 2    | 404 | 34. 31580153 |
| T19C3. 6    | 404 | 34. 31580153 |
| Y37A1B. 17  | 404 | 34. 31580153 |
| Y54E10BR. 5 | 404 | 34. 31580153 |
| F49E8. 4    | 403 | 34. 23086142 |
| K09B11. 1   | 403 | 34. 23086142 |
| W06B11. 2   | 403 | 34. 23086142 |
| Y17G7B. 10  | 403 | 34. 23086142 |
| B0205. 7    | 402 | 34. 14592132 |
| C35D10. 4   | 402 | 34. 14592132 |
| C56A3. 6    | 402 | 34. 14592132 |
| F36H12. 2   | 402 | 34. 14592132 |
| VF13D12L. 3 | 402 | 34. 14592132 |
| Y62F5A. 9   | 402 | 34. 14592132 |
| B0304. 4    | 401 | 34. 06098122 |
| C50B6. 2    | 401 | 34. 06098122 |
| D2085. 1    | 401 | 34. 06098122 |
| Y41D4A. 5   | 401 | 34. 06098122 |
| Y45G5AM. 9  | 400 | 33. 97604112 |
| C02F5. 10   | 399 | 33. 89110101 |
| C08B6. 9    | 399 | 33. 89110101 |
| C07G3. 8    | 397 | 33. 72122081 |
| F26F4. 3    | 397 | 33. 72122081 |
| Y39A3CL. 4  | 397 | 33. 72122081 |
| C01G10. 12  | 396 | 33. 6362807  |
| E01G4. 1    | 396 | 33. 6362807  |
| F25H9. 6    | 396 | 33. 6362807  |
| F54F2. 8    | 396 | 33. 6362807  |
| K02B12. 5   | 396 | 33. 6362807  |
| Y39A3CR. 7  | 396 | 33. 6362807  |
| K08H10. 4   | 395 | 33. 5513406  |
| Y23H5A. 4   | 395 | 33. 5513406  |
| C42C1. 8    | 394 | 33. 4664005  |
| E01A2. 1    | 394 | 33. 4664005  |
| F59B2. 7    | 394 | 33. 4664005  |
| Y17G7B. 4   | 394 | 33. 4664005  |
| F26A1. 1    | 393 | 33. 3814604  |
| H43I07. 3   | 393 | 33. 3814604  |
| F26D11. 1   | 392 | 33. 29652029 |
| F29G9. 3    | 392 | 33. 29652029 |
| F54C4. 4    | 392 | 33. 29652029 |
| T05G5. 9    | 392 | 33. 29652029 |
| Y54F10AR. 1 | 392 | 33. 29652029 |
| C17E4. 11   | 391 | 33. 21158019 |
| R12E2. 11   | 391 | 33. 21158019 |
| ZK673. 2    | 391 | 33. 21158019 |
| D2013. 10   | 390 | 33. 12664009 |
| F35C11. 5   | 390 | 33. 12664009 |

|              |     |              |
|--------------|-----|--------------|
| F36A2. 6     | 390 | 33. 12664009 |
| F44B9. 5     | 390 | 33. 12664009 |
| F46E10. 9    | 390 | 33. 12664009 |
| W02B12. 10   | 390 | 33. 12664009 |
| Y46G5A. 12   | 390 | 33. 12664009 |
| Y77E11A. 2   | 390 | 33. 12664009 |
| C07D8. 6     | 389 | 33. 04169998 |
| F56A8. 1     | 389 | 33. 04169998 |
| T04D1. 4     | 389 | 33. 04169998 |
| Y73F8A. 32   | 389 | 33. 04169998 |
| C30H7. 2     | 388 | 32. 95675988 |
| Y106G6E. 6   | 388 | 32. 95675988 |
| C17F4. 5     | 387 | 32. 87181978 |
| F37C12. 4    | 387 | 32. 87181978 |
| K02C4. 4     | 387 | 32. 87181978 |
| M04G12. 4    | 387 | 32. 87181978 |
| R148. 4      | 387 | 32. 87181978 |
| T16H12. 4    | 387 | 32. 87181978 |
| Y39G10AR. 20 | 387 | 32. 87181978 |
| ZK185. 1     | 387 | 32. 87181978 |
| D1014. 3     | 386 | 32. 78687968 |
| F22H10. 5    | 386 | 32. 78687968 |
| R02F2. 4     | 386 | 32. 78687968 |
| C08B11. 7    | 385 | 32. 70193957 |
| F20D12. 5    | 385 | 32. 70193957 |
| F29F11. 3    | 385 | 32. 70193957 |
| Y110A7A. 12  | 385 | 32. 70193957 |
| C44B9. 3     | 384 | 32. 61699947 |
| F45H10. 2    | 384 | 32. 61699947 |
| JC8. 3       | 384 | 32. 61699947 |
| T24H10. 4    | 384 | 32. 61699947 |
| Y17G7B. 7    | 384 | 32. 61699947 |
| Y46H3C. 7    | 384 | 32. 61699947 |
| F15D3. 1     | 383 | 32. 53205937 |
| F15D4. 4     | 383 | 32. 53205937 |
| F26D2. 2     | 383 | 32. 53205937 |
| F42A8. 2     | 383 | 32. 53205937 |
| K06H7. 4     | 383 | 32. 53205937 |
| B0244. 2     | 382 | 32. 44711926 |
| C01G6. 4     | 382 | 32. 44711926 |
| C34B2. 10    | 382 | 32. 44711926 |
| E02H1. 3     | 382 | 32. 44711926 |
| EEED8. 3     | 382 | 32. 44711926 |
| M01F1. 5     | 382 | 32. 44711926 |
| T04H1. 6     | 382 | 32. 44711926 |
| Y49F6C. 5    | 382 | 32. 44711926 |
| C34C12. 8    | 381 | 32. 36217916 |
| F27D4. 7     | 381 | 32. 36217916 |
| F53G12. 5    | 381 | 32. 36217916 |
| T20D3. 7     | 381 | 32. 36217916 |
| W09G3. 3     | 381 | 32. 36217916 |
| Y106G6H. 6   | 381 | 32. 36217916 |
| Y47H9C. 9    | 381 | 32. 36217916 |
| R06C1. 3     | 380 | 32. 27723906 |



|              |     |              |
|--------------|-----|--------------|
| C02E11. 1    | 379 | 32. 19229896 |
| C04B4. 2     | 379 | 32. 19229896 |
| F33H1. 3     | 379 | 32. 19229896 |
| F55G1. 11    | 379 | 32. 19229896 |
| K09E4. 3     | 379 | 32. 19229896 |
| Y56A3A. 30   | 379 | 32. 19229896 |
| C09E7. 4     | 378 | 32. 10735885 |
| C41D11. 5    | 378 | 32. 10735885 |
| F52E1. 10    | 378 | 32. 10735885 |
| K02B2. 5     | 378 | 32. 10735885 |
| Y56A3A. 4    | 378 | 32. 10735885 |
| AC8. 11      | 377 | 32. 02241875 |
| M02F4. 1     | 377 | 32. 02241875 |
| T02H6. 11    | 377 | 32. 02241875 |
| F57C2. 2     | 376 | 31. 93747865 |
| R06B9. 3     | 376 | 31. 93747865 |
| Y18D10A. 20  | 376 | 31. 93747865 |
| Y54H5A. 2    | 376 | 31. 93747865 |
| ZK418. 7     | 376 | 31. 93747865 |
| C06A5. 8     | 375 | 31. 85253855 |
| B0334. 3     | 374 | 31. 76759844 |
| B0491. 7     | 374 | 31. 76759844 |
| C29E4. 13    | 373 | 31. 68265834 |
| C33H5. 15    | 373 | 31. 68265834 |
| F40A3. 3     | 373 | 31. 68265834 |
| Y104H12BR. 1 | 373 | 31. 68265834 |
| Y119D3B. 15  | 373 | 31. 68265834 |
| Y43E12A. 1   | 373 | 31. 68265834 |
| C24G6. 1     | 372 | 31. 59771824 |
| ZK686. 4     | 372 | 31. 59771824 |
| K03H6. 5     | 371 | 31. 51277813 |
| Y43B11AR. 3  | 371 | 31. 51277813 |
| B0019. 2     | 370 | 31. 42783803 |
| F26D10. 10   | 370 | 31. 42783803 |
| F52H3. 2     | 370 | 31. 42783803 |
| Y66H1B. 4    | 370 | 31. 42783803 |
| K07A1. 8     | 369 | 31. 34289793 |
| T23G11. 7    | 369 | 31. 34289793 |
| D2030. 3     | 368 | 31. 25795783 |
| F09E5. 8     | 368 | 31. 25795783 |
| T02C1. 1     | 368 | 31. 25795783 |
| W02D9. 2     | 368 | 31. 25795783 |
| Y37D8A. 21   | 368 | 31. 25795783 |
| C24F3. 5     | 367 | 31. 17301772 |
| F26A1. 13    | 367 | 31. 17301772 |
| F29B9. 4     | 367 | 31. 17301772 |
| F57C9. 3     | 367 | 31. 17301772 |
| K08H2. 1     | 367 | 31. 17301772 |
| T19A6. 3     | 367 | 31. 17301772 |
| Y50C1A. 1    | 367 | 31. 17301772 |
| C34B7. 4     | 366 | 31. 08807762 |
| K07B1. 7     | 366 | 31. 08807762 |
| Y55F3AM. 21  | 366 | 31. 08807762 |
| Y71F9B. 16   | 366 | 31. 08807762 |

|            |     |              |
|------------|-----|--------------|
| W10D9. 6   | 365 | 31. 00313752 |
| B0035. 14  | 364 | 30. 91819741 |
| C06G3. 8   | 364 | 30. 91819741 |
| C37A2. 7   | 364 | 30. 91819741 |
| F33D4. 1   | 364 | 30. 91819741 |
| F40G9. 1   | 363 | 30. 83325731 |
| K11D2. 1   | 363 | 30. 83325731 |
| D1046. 3   | 362 | 30. 74831721 |
| F14E5. 8   | 362 | 30. 74831721 |
| F52C9. 1   | 362 | 30. 74831721 |
| F54D8. 6   | 362 | 30. 74831721 |
| F59G1. 1   | 362 | 30. 74831721 |
| R119. 3    | 362 | 30. 74831721 |
| W04B5. 1   | 362 | 30. 74831721 |
| Y87G2A. 14 | 362 | 30. 74831721 |
| F26E4. 6   | 361 | 30. 66337711 |
| T07F10. 3  | 361 | 30. 66337711 |
| W05F2. 3   | 361 | 30. 66337711 |
| Y49A3A. 3  | 361 | 30. 66337711 |
| ZC15. 3    | 361 | 30. 66337711 |
| F30B5. 4   | 360 | 30. 578437   |
| H17B01. 1  | 360 | 30. 578437   |
| T13F2. 1   | 360 | 30. 578437   |
| Y25C1A. 8  | 360 | 30. 578437   |
| F21F3. 4   | 359 | 30. 4934969  |
| F46B6. 12  | 359 | 30. 4934969  |
| C55B6. 2   | 358 | 30. 4085568  |
| F26A3. 2   | 358 | 30. 4085568  |
| JC8. 7     | 358 | 30. 4085568  |
| F43G9. 4   | 357 | 30. 3236167  |
| M04B2. 3   | 357 | 30. 3236167  |
| Y105E8A. 2 | 357 | 30. 3236167  |
| Y79H2A. 4  | 357 | 30. 3236167  |
| CC4. 3     | 356 | 30. 23867659 |
| Y49E10. 14 | 356 | 30. 23867659 |
| ZK669. 4   | 356 | 30. 23867659 |
| K03B4. 7   | 355 | 30. 15373649 |
| W06E11. 2  | 355 | 30. 15373649 |
| F35G12. 4  | 354 | 30. 06879639 |
| F54B3. 3   | 354 | 30. 06879639 |
| Y39A1A. 23 | 354 | 30. 06879639 |
| Y54E5B. 3  | 354 | 30. 06879639 |
| ZK418. 5   | 354 | 30. 06879639 |
| C34G6. 5   | 353 | 29. 98385628 |
| F35H12. 2  | 353 | 29. 98385628 |
| F56A8. 4   | 353 | 29. 98385628 |
| W03F9. 5   | 353 | 29. 98385628 |
| C50F4. 13  | 352 | 29. 89891618 |
| F37C12. 1  | 352 | 29. 89891618 |
| F59A3. 5   | 352 | 29. 89891618 |
| Y67D2. 6   | 352 | 29. 89891618 |
| ZK154. 7   | 352 | 29. 89891618 |
| C54C6. 2   | 351 | 29. 81397608 |
| F39B2. 5   | 351 | 29. 81397608 |

|             |     |              |
|-------------|-----|--------------|
| F54E7. 9    | 351 | 29. 81397608 |
| R12B2. 4    | 351 | 29. 81397608 |
| C05D11. 12  | 350 | 29. 72903598 |
| M163. 4     | 350 | 29. 72903598 |
| Y57A10A. 28 | 350 | 29. 72903598 |
| F48E8. 4    | 349 | 29. 64409587 |
| W04B5. 2    | 349 | 29. 64409587 |
| Y36E3A. 2   | 349 | 29. 64409587 |
| Y37F4. 6    | 349 | 29. 64409587 |
| C54G4. 8    | 348 | 29. 55915577 |
| F54D10. 4   | 348 | 29. 55915577 |
| T16H12. 2   | 348 | 29. 55915577 |
| T26A5. 4    | 348 | 29. 55915577 |
| Y38F2AR. 1  | 348 | 29. 55915577 |
| Y48E1B. 2   | 348 | 29. 55915577 |
| ZC434. 6    | 348 | 29. 55915577 |
| C55A6. 10   | 347 | 29. 47421567 |
| E02H1. 6    | 347 | 29. 47421567 |
| F49E8. 7    | 347 | 29. 47421567 |
| R10F2. 6    | 347 | 29. 47421567 |
| Y111B2A. 12 | 347 | 29. 47421567 |
| C34B2. 7    | 346 | 29. 38927556 |
| C34C12. 1   | 346 | 29. 38927556 |
| F53F4. 4    | 346 | 29. 38927556 |
| K06H7. 3    | 346 | 29. 38927556 |
| T04A8. 6    | 346 | 29. 38927556 |
| Y56A3A. 31  | 346 | 29. 38927556 |
| Y71H2AM. 4  | 346 | 29. 38927556 |
| C03D6. 1    | 345 | 29. 30433546 |
| F09F7. 7    | 345 | 29. 30433546 |
| F54D5. 11   | 345 | 29. 30433546 |
| R02D5. 8    | 345 | 29. 30433546 |
| T10B11. 1   | 345 | 29. 30433546 |
| W10D9. 3    | 345 | 29. 30433546 |
| C53A5. 1    | 344 | 29. 21939536 |
| F26H9. 4    | 344 | 29. 21939536 |
| F47D12. 4   | 344 | 29. 21939536 |
| Y110A2AL. 1 | 344 | 29. 21939536 |
| Y37E3. 7    | 344 | 29. 21939536 |
| F11A6. 2    | 343 | 29. 13445526 |
| T05A12. 4   | 343 | 29. 13445526 |
| T07E3. 2    | 343 | 29. 13445526 |
| T22D1. 10   | 343 | 29. 13445526 |
| Y39B6A. 34  | 343 | 29. 13445526 |
| ZC155. 4    | 343 | 29. 13445526 |
| F46F11. 5   | 342 | 29. 04951515 |
| F53F1. 2    | 342 | 29. 04951515 |
| W09G3. 7    | 342 | 29. 04951515 |
| ZK131. 5    | 342 | 29. 04951515 |
| B0041. 8    | 341 | 28. 96457505 |
| B0361. 10   | 341 | 28. 96457505 |
| C45G3. 5    | 341 | 28. 96457505 |
| H20J04. 4   | 341 | 28. 96457505 |
| B0379. 4    | 340 | 28. 87963495 |

|             |     |              |
|-------------|-----|--------------|
| D2096. 7    | 340 | 28. 87963495 |
| F46B6. 3    | 340 | 28. 87963495 |
| F55F8. 4    | 340 | 28. 87963495 |
| M18. 3      | 340 | 28. 87963495 |
| C34E10. 11  | 339 | 28. 79469485 |
| F08G12. 2   | 339 | 28. 79469485 |
| K06H7. 6    | 339 | 28. 79469485 |
| Y47D3B. 11  | 339 | 28. 79469485 |
| C49A9. 4    | 338 | 28. 70975474 |
| F54C8. 5    | 338 | 28. 70975474 |
| K07B1. 4    | 338 | 28. 70975474 |
| T22A3. 8    | 338 | 28. 70975474 |
| C16C10. 2   | 337 | 28. 62481464 |
| F01F1. 2    | 337 | 28. 62481464 |
| F09G2. 1    | 337 | 28. 62481464 |
| F39B2. 8    | 337 | 28. 62481464 |
| K09E3. 2    | 337 | 28. 62481464 |
| Y39E4B. 12  | 337 | 28. 62481464 |
| Y50D7A. 2   | 337 | 28. 62481464 |
| F39B2. 6    | 336 | 28. 53987454 |
| K01A11. 3   | 336 | 28. 53987454 |
| T07A5. 5    | 336 | 28. 53987454 |
| T21C9. 4    | 336 | 28. 53987454 |
| F07F6. 7    | 335 | 28. 45493443 |
| F31E9. 6    | 335 | 28. 45493443 |
| M02D8. 3    | 335 | 28. 45493443 |
| M142. 6     | 335 | 28. 45493443 |
| T21C9. 13   | 335 | 28. 45493443 |
| Y54E10BL. 4 | 335 | 28. 45493443 |
| C24H12. 2   | 334 | 28. 36999433 |
| C01G10. 10  | 333 | 28. 28505423 |
| C41G7. 1    | 333 | 28. 28505423 |
| D1069. 3    | 333 | 28. 28505423 |
| F21D5. 7    | 333 | 28. 28505423 |
| W08F4. 6    | 333 | 28. 28505423 |
| Y54E10A. 7  | 333 | 28. 28505423 |
| C35D10. 17  | 332 | 28. 20011413 |
| T07A9. 8    | 332 | 28. 20011413 |
| W02F12. 6   | 332 | 28. 20011413 |
| C16C8. 13   | 331 | 28. 11517402 |
| F25H2. 12   | 331 | 28. 11517402 |
| F26H9. 2    | 331 | 28. 11517402 |
| T24H7. 4    | 331 | 28. 11517402 |
| Y17G7B. 12  | 331 | 28. 11517402 |
| Y55F3AM. 7  | 331 | 28. 11517402 |
| C18D1. 1    | 330 | 28. 03023392 |
| C25H3. 7    | 330 | 28. 03023392 |
| F15C11. 2   | 330 | 28. 03023392 |
| F49C12. 9   | 330 | 28. 03023392 |
| H20J04. 9   | 330 | 28. 03023392 |
| M142. 8     | 330 | 28. 03023392 |
| T25D3. 2    | 330 | 28. 03023392 |
| C14B9. 2    | 329 | 27. 94529382 |
| M88. 4      | 329 | 27. 94529382 |

|             |     |              |
|-------------|-----|--------------|
| R74. 6      | 329 | 27. 94529382 |
| T20B12. 7   | 329 | 27. 94529382 |
| ZK783. 2    | 329 | 27. 94529382 |
| C50F4. 7    | 328 | 27. 86035371 |
| F20D1. 6    | 328 | 27. 86035371 |
| F21F3. 7    | 328 | 27. 86035371 |
| T20H4. 5    | 328 | 27. 86035371 |
| Y38F2AR. 9  | 328 | 27. 86035371 |
| C33H5. 10   | 327 | 27. 77541361 |
| C50C3. 7    | 327 | 27. 77541361 |
| T12B5. 11   | 327 | 27. 77541361 |
| Y37H2A. 6   | 327 | 27. 77541361 |
| ZK287. 5    | 327 | 27. 77541361 |
| F22D6. 9    | 326 | 27. 69047351 |
| T12F5. 4    | 326 | 27. 69047351 |
| T24H7. 3    | 326 | 27. 69047351 |
| T27C10. 3   | 326 | 27. 69047351 |
| Y106G6A. 1  | 326 | 27. 69047351 |
| Y39G10AR. 6 | 326 | 27. 69047351 |
| Y46G5A. 19  | 326 | 27. 69047351 |
| Y48A6B. 8   | 326 | 27. 69047351 |
| Y65B4BL. 5  | 326 | 27. 69047351 |
| F54E7. 1    | 325 | 27. 60553341 |
| Y53F4B. 16  | 325 | 27. 60553341 |
| Y57G11C. 34 | 325 | 27. 60553341 |
| ZK652. 4    | 325 | 27. 60553341 |
| C04A2. 1    | 324 | 27. 5205933  |
| M01E5. 2    | 324 | 27. 5205933  |
| Y57E12AM. 1 | 324 | 27. 5205933  |
| C50C3. 8    | 323 | 27. 4356532  |
| F26D10. 9   | 323 | 27. 4356532  |
| F26F4. 4    | 323 | 27. 4356532  |
| T05A12. 2   | 323 | 27. 4356532  |
| C01F1. 6    | 322 | 27. 3507131  |
| F22B5. 10   | 322 | 27. 3507131  |
| F56H9. 5    | 322 | 27. 3507131  |
| Y18D10A. 16 | 322 | 27. 3507131  |
| C14B1. 3    | 321 | 27. 26577299 |
| C18D11. 3   | 321 | 27. 26577299 |
| Y53C10A. 6  | 321 | 27. 26577299 |
| B0511. 9    | 320 | 27. 18083289 |
| F13B9. 1    | 320 | 27. 18083289 |
| F26A3. 4    | 320 | 27. 18083289 |
| R12B2. 2    | 320 | 27. 18083289 |
| T09A5. 6    | 320 | 27. 18083289 |
| T25B9. 9    | 320 | 27. 18083289 |
| Y56A3A. 7   | 320 | 27. 18083289 |
| ZK909. 3    | 320 | 27. 18083289 |
| C53D5. 1    | 319 | 27. 09589279 |
| F54D5. 1    | 319 | 27. 09589279 |
| Y119D3B. 22 | 319 | 27. 09589279 |
| EEED8. 1    | 318 | 27. 01095269 |
| EGAP798. 1  | 318 | 27. 01095269 |
| F36H1. 1    | 318 | 27. 01095269 |

|              |     |              |
|--------------|-----|--------------|
| F52C6. 11    | 318 | 27. 01095269 |
| M01E11. 1    | 318 | 27. 01095269 |
| T05H10. 2    | 318 | 27. 01095269 |
| Y38H6C. 11   | 318 | 27. 01095269 |
| C15C7. 2     | 317 | 26. 92601258 |
| E_BE45912. 2 | 316 | 26. 84107248 |
| F42G9. 5     | 316 | 26. 84107248 |
| ZC123. 1     | 316 | 26. 84107248 |
| ZK131. 9     | 316 | 26. 84107248 |
| ZK836. 2     | 316 | 26. 84107248 |
| F44E5. 1     | 315 | 26. 75613238 |
| H20J04. 3    | 315 | 26. 75613238 |
| R74. 3       | 315 | 26. 75613238 |
| T08D2. 2     | 315 | 26. 75613238 |
| T22C1. 5     | 315 | 26. 75613238 |
| Y50D4C. 6    | 315 | 26. 75613238 |
| B0035. 16    | 314 | 26. 67119228 |
| C08B11. 5    | 314 | 26. 67119228 |
| C27F2. 9     | 314 | 26. 67119228 |
| F01D4. 5     | 314 | 26. 67119228 |
| F18A1. 7     | 314 | 26. 67119228 |
| F53B6. 4     | 314 | 26. 67119228 |
| ZK328. 4     | 314 | 26. 67119228 |
| F02C12. 3    | 313 | 26. 58625217 |
| F11A10. 8    | 313 | 26. 58625217 |
| F47G3. 2     | 313 | 26. 58625217 |
| F49E7. 1     | 313 | 26. 58625217 |
| F57B9. 3     | 313 | 26. 58625217 |
| ZK682. 2     | 313 | 26. 58625217 |
| F22D6. 10    | 312 | 26. 50131207 |
| F54E12. 5    | 312 | 26. 50131207 |
| M05D6. 2     | 312 | 26. 50131207 |
| R04F11. 5    | 312 | 26. 50131207 |
| C45H4. 14    | 311 | 26. 41637197 |
| F54D12. 6    | 311 | 26. 41637197 |
| R10E4. 1     | 311 | 26. 41637197 |
| R11D1. 10    | 311 | 26. 41637197 |
| T01G9. 6     | 311 | 26. 41637197 |
| Y71G10AR. 4  | 311 | 26. 41637197 |
| C03H5. 3     | 310 | 26. 33143186 |
| C46A5. 4     | 310 | 26. 33143186 |
| F01D5. 10    | 310 | 26. 33143186 |
| F32B5. 6     | 310 | 26. 33143186 |
| F45E6. 2     | 310 | 26. 33143186 |
| M142. 1      | 310 | 26. 33143186 |
| R06F6. 12    | 310 | 26. 33143186 |
| Y48G8AL. 7   | 310 | 26. 33143186 |
| ZK353. 7     | 310 | 26. 33143186 |
| C18E9. 11    | 309 | 26. 24649176 |
| E02H9. 9     | 309 | 26. 24649176 |
| T08G11. 4    | 309 | 26. 24649176 |
| T12A2. 8     | 309 | 26. 24649176 |
| ZK1073. 1    | 309 | 26. 24649176 |
| B0393. 8     | 308 | 26. 16155166 |

|            |     |              |
|------------|-----|--------------|
| C10H11. 8  | 308 | 26. 16155166 |
| F40G9. 4   | 308 | 26. 16155166 |
| ZK858. 3   | 308 | 26. 16155166 |
| C11D2. 7   | 307 | 26. 07661156 |
| C26B2. 6   | 307 | 26. 07661156 |
| F39F10. 2  | 307 | 26. 07661156 |
| K02A11. 1  | 307 | 26. 07661156 |
| R08A2. 7   | 307 | 26. 07661156 |
| R10E11. 4  | 307 | 26. 07661156 |
| T16G1. 11  | 307 | 26. 07661156 |
| Y38F2AR. 2 | 307 | 26. 07661156 |
| Y47G6A. 14 | 307 | 26. 07661156 |
| Y48G8AL. 8 | 307 | 26. 07661156 |
| F10D11. 1  | 306 | 25. 99167145 |
| F32H2. 2   | 306 | 25. 99167145 |
| T23B12. 7  | 306 | 25. 99167145 |
| ZK829. 6   | 306 | 25. 99167145 |
| C29F9. 1   | 305 | 25. 90673135 |
| C52A11. 4  | 305 | 25. 90673135 |
| F43G9. 13  | 305 | 25. 90673135 |
| T14G10. 1  | 305 | 25. 90673135 |
| ZK1236. 1  | 305 | 25. 90673135 |
| R01B10. 6  | 304 | 25. 82179125 |
| R05H5. 5   | 304 | 25. 82179125 |
| T21H3. 3   | 304 | 25. 82179125 |
| Y51F10. 11 | 304 | 25. 82179125 |
| C31C9. 8   | 303 | 25. 73685114 |
| F10E7. 11  | 303 | 25. 73685114 |
| F40G9. 2   | 303 | 25. 73685114 |
| F44E2. 3   | 303 | 25. 73685114 |
| F52C6. 8   | 303 | 25. 73685114 |
| K02B12. 7  | 303 | 25. 73685114 |
| F28D1. 7   | 302 | 25. 65191104 |
| F45E4. 3   | 302 | 25. 65191104 |
| F56B3. 8   | 302 | 25. 65191104 |
| K03B4. 2   | 302 | 25. 65191104 |
| R10E11. 6  | 302 | 25. 65191104 |
| T12G3. 8   | 302 | 25. 65191104 |
| Y113G7B. 3 | 302 | 25. 65191104 |
| F20D1. 4   | 301 | 25. 56697094 |
| T10B11. 5  | 301 | 25. 56697094 |
| ZK20. 4    | 301 | 25. 56697094 |
| C08H9. 16  | 300 | 25. 48203084 |
| C37A5. 7   | 300 | 25. 48203084 |
| F27D4. 1   | 300 | 25. 48203084 |
| F40G9. 17  | 300 | 25. 48203084 |
| T27F6. 4   | 300 | 25. 48203084 |
| Y48G1A. 1  | 300 | 25. 48203084 |
| F56A11. 1  | 299 | 25. 39709073 |
| VW06B3R. 1 | 299 | 25. 39709073 |
| W02C12. 3  | 299 | 25. 39709073 |
| Y40B1A. 1  | 299 | 25. 39709073 |
| Y53G8AR. 6 | 299 | 25. 39709073 |
| C07G2. 3   | 298 | 25. 31215063 |

|             |     |              |
|-------------|-----|--------------|
| C53B4. 7    | 298 | 25. 31215063 |
| D2013. 1    | 298 | 25. 31215063 |
| F10E9. 4    | 298 | 25. 31215063 |
| F29G9. 1    | 298 | 25. 31215063 |
| F52E10. 1   | 298 | 25. 31215063 |
| K02B12. 8   | 298 | 25. 31215063 |
| M162. 11    | 298 | 25. 31215063 |
| T05H4. 5    | 298 | 25. 31215063 |
| Y53F4B. 2   | 298 | 25. 31215063 |
| Y69A2AR. 21 | 298 | 25. 31215063 |
| B0261. 4    | 297 | 25. 22721053 |
| C46C2. 2    | 297 | 25. 22721053 |
| C45E5. 6    | 296 | 25. 14227043 |
| CE7X_3. 1   | 296 | 25. 14227043 |
| F37C12. 3   | 296 | 25. 14227043 |
| F40F8. 10   | 296 | 25. 14227043 |
| Y56A3A. 15  | 296 | 25. 14227043 |
| Y59A8B. 12  | 296 | 25. 14227043 |
| ZK1236. 3   | 296 | 25. 14227043 |
| F10B5. 5    | 295 | 25. 05733032 |
| F58A4. 14   | 295 | 25. 05733032 |
| Y53C12A. 11 | 295 | 25. 05733032 |
| Y54G2A. 50  | 295 | 25. 05733032 |
| Y92C3B. 3   | 295 | 25. 05733032 |
| ZK973. 10   | 295 | 25. 05733032 |



**Table S2. Sequences of Real-Time PCR Primers**

|                         |                             |
|-------------------------|-----------------------------|
| <i>lin-15b</i> mRNA #1F | TTTCCAGTGGGCTGACACAA        |
| <i>lin-15b</i> mRNA #1R | AACGTGTCGTGCCAAACAAG        |
| <i>lin-15b</i> mRNA #2F | TGAGGATTTGTACGAGCGCA        |
| <i>lin-15b</i> mRNA #2R | ACTGTTGCTGTCTAGCTCGG        |
| <i>lin-15b</i> mRNA #3F | TTTGCAAGGCATCGTGTGAC        |
| <i>lin-15b</i> mRNA #3R | TGAAAAGCTGTGCCTGTCCT        |
| <i>lin-15b</i> mRNA #4F | GAAACGCCAGCGGAATTGAA        |
| <i>lin-15b</i> mRNA #4R | GCTTCCAGAACTTGCTTGCG        |
| <i>dpy-28</i> mRNA # 1F | GTTGAGCTCACTTTCACGGC        |
| <i>dpy-28</i> mRNA # 1R | AGCTCCGGAACAAGAAACGA        |
| <i>dpy-28</i> mRNA # 2F | CACCAAGAACAAGGCCCGC         |
| <i>dpy-28</i> mRNA # 2R | GAGGAGCTCTGCGTCTTGAG        |
| <i>pos-1</i> mRNA F     | TCCAATGAACCCTCGTGGGA        |
| <i>pos-1</i> mRNA R     | TGCTGGTGATTTGGATGAAG        |
| <i>eft-3</i> mRNA F     | ACTTGATCTACAAGTGCGGAGGA     |
| <i>eft-3</i> mRNA R     | AAAGATCCCTTACCCATCTCCTG     |
| <i>klp-19</i> RTF       | TTGCATTGCAAAAAGAAGTTTCC     |
| <i>klp-19</i> RTR       | TAATACAAACGTTGTTCCCTCCAAT   |
| <i>cdk-1</i> RTF        | AAAGTTACACATTCCAAATTCTTC    |
| <i>cdk-1</i> RTR        | TACCAGAGAGTGACAACCTTCATGC   |
| <i>B0361.3</i> RTF      | TGAATTCTGTCAATGATTTCTAC     |
| <i>B0361.3</i> RTR      | AATATTTGCACAACGAACCAATATG   |
| <i>inft-2</i> RTF       | CTCCGGGCTCAACTAAGGCTAA      |
| <i>inft-2</i> RTR       | TAGGCTCGGGAGATATCGAATGT     |
| <i>hal-2</i> RTF        | ACATTCGCCTCTGGTTTCTACA      |
| <i>hal-2</i> RTR        | GTATTTGCATTTCAATCTTATCCAAG  |
| <i>B0047.3</i> RTF      | TTACGTTCTGAAAGTGTATCTGGC    |
| <i>B0047.3</i> RTR      | ATCGATGGTAGAATCATCAATCG     |
| <i>zk1067.2</i> RTF     | TCGAAAAGATGAATCTCGAATG      |
| <i>zk1067.2</i> RTR     | CTTTGCGTTACACGGTTTCG        |
| <i>chk-2</i> RTF        | TTCTTCCATCGACTTGGCAGACG     |
| <i>chk-2</i> RTR        | CGTTTCTGTGTCTCTATCAATGG     |
| <i>oma-1</i> RTF        | CCTAGACGCCGCGGATTAGC        |
| <i>oma-1</i> RTR        | AGCGGCTCGACGAATGTTGG        |
| <i>csr-1</i> qRTF       | ACAGAGTGCCATTAGAAGCGAAAG    |
| <i>csr-1</i> qRTR       | GTA CTGAGTCGATTGAGGATCGAG   |
| <i>ego-1</i> qRTF       | ACCATGTATTACCAGATTACAGTTAGG |
| <i>ego-1</i> qRTR       | CGGAGTGCCGATTTTCCGATTC      |
| <i>GFP</i> RT F         | GGA ACTACAAGACACGTGCTG      |
| <i>GFP</i> RT R         | GTTTGTCTGCCATGATGTATAC      |
| <i>Y54G2A.19</i> RTF    | GACGACCGGACCTGGATCTCAT      |
| <i>Y54G2A.19</i> RTR    | GGCTTTTGCCTCCGGTTGAA        |
| <i>B0047.3</i> RTF      | TCAGCTGGAGAATTTGAAAACCGT    |
| <i>B0047.3</i> RTR      | GCGACGCAAAAAGCACTTCGT       |
| <i>W09C5.12</i> RTF     | GGTCATCCAAACATCACATCACTGG   |
| <i>W09C5.12</i> RTR     | GGCAGCTGGTCCTAAGTTGCT       |
| <i>Y17D7B.4</i> RTF     | ACGTCAGGGGCCCAGAAACT        |
| <i>Y17D7B.4</i> RTR     | TCCGATCCATCGTCGAGTGCT       |

|                      |                                |
|----------------------|--------------------------------|
| <i>his-24</i> RTF    | AAGCAGCTCAAGGACCGCAA           |
| <i>his-24</i> RTR    | GACGGAGATGAGCATTGATCTGG        |
| <i>T24H10.5</i> RTF  | TGCAGCAAAACGAATCGTGGG          |
| <i>T24H10.5</i> RTR  | TAAGTTGCTCCGGTCCAGACAC         |
| <i>C25H3.12</i> RTF  | CCGAATATGGCAAGGATTTCCGC        |
| <i>C25H3.12</i> RTR  | AACGCCCGCACCTTCGTTTA           |
| <i>Y56A3A.18</i> RTF | CAAGCTTCTCCAGCAAGAGATCG        |
| <i>Y56A3A.18</i> RTR | TGCGATGAAGCTGTCTGGGTT          |
| <i>F10E7.2</i> RTF   | GTCCGCACATTGCAACAACG           |
| <i>F10E7.2</i> RTR   | TTGGTCGCAAGCCGCTTTAT           |
| <i>zk1067.3</i> RTF  | CGAAGAAGGCTGATAGAAAAAAGATCAATC |
| <i>zk1067.3</i> RTR  | GCAAAGTGTTCGATAGAACTGTTTGAA    |
| <i>klp-18</i> RTF    | GTTGCATTGCAAAAAGAAGTTTCC       |
| <i>klp-18</i> RTR    | CGTAATACAAACGTTGTTTCCTCCAA     |
| <i>prg-1</i> RTF     | GGAAGGTGAACATTCCGCTTAAAAAC     |
| <i>prg-1</i> RTR     | GTAATACTGCTTCAAGGCTTTTCGAACA   |
| <i>set-2</i> RTF     | GATAAATCAGCTCAAATTCCGCAA       |
| <i>set-2</i> RTR     | ACCAGAGATCGGATCGTCTGTC         |
| <i>cls-2</i> RTF     | GCTCATTTTGAATGAGGAGAAAG        |
| <i>cls-2</i> RTR     | ATGGGGAATCGTAAGACTTGATCA       |
| <i>Y48G1BM.1</i> RTF | TGGATCCGTCGATCACAATC           |
| <i>Y48G1BM.1</i> RTR | GTGGGATTCATCTCTCAGGC           |
| <i>csr-1</i> RTF     | CAGAGTGCCATTAGAAGCGAAAGA       |
| <i>csr-1</i> RTR     | GTAAGTGTTCGATTGAGGATCGAG       |
| <i>K07A12.2</i> RTF  | ACAATGCTCTTTATGCACTCCCGT       |
| <i>K07A12.2</i> RTR  | TGGACAATGTTGTTGTTCTGAACA       |
| <i>CD4.8</i> RTF     | TGCCTACCACAGGAGATTTCAAAG       |
| <i>CD4.8</i> RTR     | TGCCAGTCGATTTGATCAATGTCA       |
| <i>bath-45</i> RTF   | CTATGCTATTGACGACGACAACG        |
| <i>bath-45</i> RTR   | TGAGAGACAGTGCTTCTTCAAGT        |
